# Supplementary material
Source: publisher site journal article supplement (https://www.degruyterbrill.com/publication/isbn/9783110411157/downloadAsset/9783110411157_Materialien.zip)
Supplement: Supplementary file 1 [file Aufgaben.pdf › Aufgaben.pdf]

# Vorwort

Die Regelungs- und Steuerungstechnik stellt sich für viele Studierende als gewöhnungsbedürftig, um nicht schwierig zu sagen, dar. Für Ingenieure ist sie trotzdem eine wichtige Fachdisziplin. Sie findet bei vielen Geräten und Maschinen ihre Anwendung.

Um so wichtiger ist es, ihre Grundzüge und prinzipielle Vorgehensweise zu erlernen. Wie kann man diese besser, als durch Übung, erwerben?

Im Lehrbuch Steuerungs- und Regelungstechnik für Ingenieure ist zu Beginn jedes Abschnitts neben der kurzen Nennung der Lernziele eine Lernaufgabe zu formulieren. An ihr kann sich der Leser vor der Aneignung der nachfolgenden Darlegungen selbst versuchen. Der Wissensinhalt des Abschnitts müsste ihn nach der Lektüre in die Lage versetzen, die Aufgabe selbstständig zu lösen. Die Bearbeitung der Lernaufgabe wird zusätzlich am Ende jeden Kapitels vorgestellt. Zur weiteren Selbstkontrolle sind dort auch Fragen zu jedem Abschnitt gestellt, die der aufmerksame Leser "aus dem Stand" beantworten können sollte.

Hier sind nun zu jedem Kapitel Aufgaben zusammen gestellt.

# Inhaltsverzeichnis

## Vorwort

|          |                                             |           |
|----------|---------------------------------------------|-----------|
| <b>1</b> | <b>Einführung</b>                           | <b>1</b>  |
| <b>2</b> | <b>Signale und Systeme</b>                  | <b>3</b>  |
| 2.1      | Grundbegriffe der Signal- und Systemtheorie | 3         |
| 2.2      | Beschreibung von Signalen                   | 4         |
| 2.3      | Beschreibungsmethoden für Systeme           | 6         |
| <b>3</b> | <b>Regelungstechnik</b>                     | <b>9</b>  |
| 3.1      | Grundbegriffe und Aufgaben von Regelungen   | 9         |
| 3.2      | Regelstrecken und Regeleinrichtungen        | 13        |
| 3.3      | Der Standard-Regelkreis                     | 15        |
| 3.4      | Stabilität von Regelkreisen                 | 17        |
| 3.5      | Regelkreisentwurf                           | 19        |
| <b>4</b> | <b>Steuerungstechnik</b>                    | <b>21</b> |
| 4.1      | Grundbegriffe der Steuerungstechnik         | 21        |
| 4.2      | Steuerungsarten                             | 21        |
| 4.3      | Methoden und Verfahren                      | 22        |
| 4.4      | Speicherprogrammierbare Steuerungen - SPS   | 23        |

# 1 Einführung

- Aufgabe 1-1: Konstruieren Sie die Raumheizung der Lernaufgabe so um, dass eine Steuerung für die Raumtemperatur entsteht!  
Skizzieren Sie dazu das Technologieschema!  
Zeichnen Sie den Wirkungszusammenhang zwischen den Systemkomponenten der Steuerungskette!
- Aufgabe 1-2: Analysieren Sie den Vorgang des Fahrradfahrens bzgl. des Gleichgewichthaltens!  
Liegt eine Steuerung oder eine Regelung vor?  
Skizzieren Sie den Wirkungsablauf!
- Aufgabe 1-3: Versuchen sie den Aufbau heutiger Thermo-Mischbatterien für Duschen zu skizzieren!  
Benennen Sie die einzelnen Komponenten und wiesen Sie ihnen ihre Wirkung im Regelkreis zu!  
Zeichnen Sie ihren Wirkungszusammenhang!
- Aufgabe 1-4: Für Fahrzeuglenkungen älteren Datums hatte man sehr viel Kraft aufzuwenden. Der Radwinkel wurde über Schnecken direkt umgesetzt. Heutige Pkw's besitzen leichtgängige Servolenkungen.  
Skizzieren Sie grob den Aufbau beider Lenkungstypen Lenkungen!  
Ordnen Sie die beide Lenkungsarten als Automatisierungssysteme ein!



## 2 Signale und Systeme

### 2.1 Grundbegriffe der Signal- und Systemtheorie

- Aufgabe 2.1-1: Entwickeln Sie einen Wirkungsplan des Autofahrens. Beschränken Sie sich auf die Lenkung und die Geschwindigkeitskontrolle bei der Fahrzeugsteuerung. Versuchen Sie dann abschließend eine Einordnung des Systems Fahrer – Fahrzeug zu geben!
- Aufgabe 2.1-2: Versuchen Sie den Wirkungsplan des Antiblockersystems eines Kraftfahrzeugs darzustellen!
- Aufgabe 2.1-3: Stellen Sie für den abgebildeten Riemenantrieb das mathematische Modell und den Wirkungsplan auf. Die Nachgiebigkeit des Riemens wird durch die Parallelschaltung eines Feder- und Dämpferelements erreicht. Die Eingangsgrößen in das System sind das Antriebs- und Lastmoment. Die Ausgangsgröße die Drehzahl  $N$ .

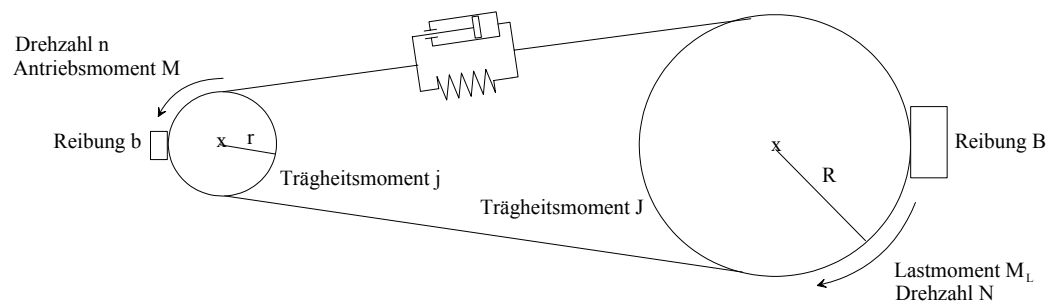

Abbildung 2.1-1: Riemenantrieb

- Aufgabe 2.1-4: Es sei folgendes hydraulisch-mechanisches Positioniersystem gegeben:

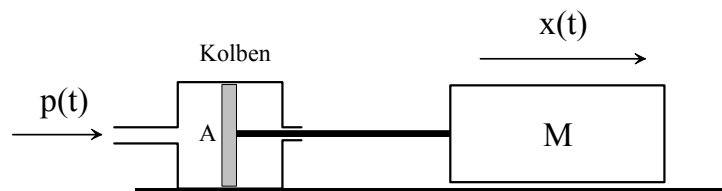

Abbildung 2.1-2: Positioniersystem

Der Druck  $p(t)$  stellt die Eingangsgröße und der Weg  $x(t)$  die Ausgangsgröße des Systems dar. Die Masse des Kolbenzylinders mit der Fläche  $A$  und die Verbindungsstange sind gegenüber der Masse  $M$  zu vernachlässigen. Die Reibungskraft zwischen der Masse und der Auflage besitzt den Reibungskoeffizienten  $b \text{ [N·s/m]}$ .

Stellen Sie den Wirkungsplan für das Positioniersystem auf!

## 2.2 Beschreibung von Signalen

Aufgabe 2.2-1: Bestimmen Sie mit Hilfe der Korrespondenztabelle für Laplace-Transformierte die Bildfunktionen der Originalsignale:

a)  $x(t) = \varepsilon(t) \cdot (2 \cdot t - 2 + e^{-t})$

b)  $x(t) = 4e^{-7t} \cos(2t) + 2e^{-t} \sin(2t)$

c)  $\ddot{x}(t) + \dot{x}(t) + x(t) = \varepsilon(t) \cdot e^{-2t}$  mit  $x(0) = 0$  und  $\dot{x}(0) = 0$ .

Aufgabe 2.2-2: Ermitteln Sie mit Hilfe der Korrespondenztabelle für Laplace-Transformierte die Originalsignale der folgenden Bildfunktionen:

a)  $X(s) = \frac{8}{s+2}$

b)  $X(s) = \frac{2 \cdot s}{s^2 + \frac{1}{4}}$

c)  $X(s) = \frac{1}{s(1+s)}$ .

Aufgabe 2.2-3: Geben Sie das Pol-Nullstellen-Schema des in nachfolgender Abbildung gezeichneten Signals an!

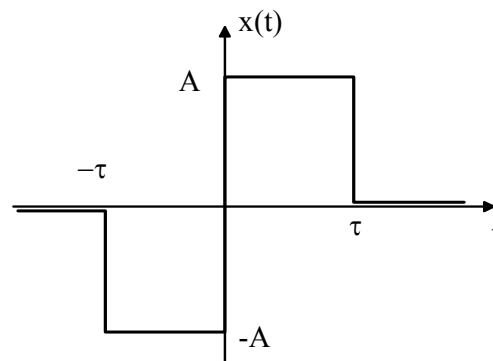

Aufgabe 2.2-4: Berechnen Sie das Spektrum des abgebildeten Rechtecksignals an!

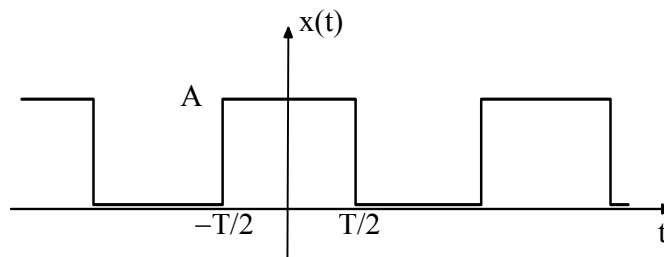

Aufgabe 2.2-5: Geben Sie das Spektrum des abgebildeten Impulses an!

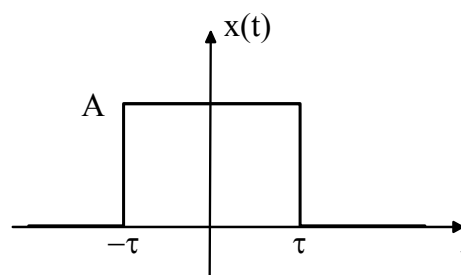

Aufgabe 2.2-6: Bestimmen Sie das Signal aus dem abgebildeten Pol-Nullstellenschema!

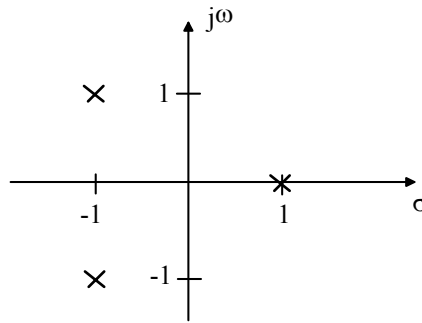

Aufgabe 2.2-7: Berechnen Sie die Bildfunktion des Signals  $x(t) = \varepsilon(t) \cdot \sin(\omega \cdot t + \varphi)$ !

Aufgabe 2.2-8: Vorausgesetzt sei, dass nur die Korrespondenz des Sprungsignals zu seiner Bildfunktion vorhanden ist:  
 $\varepsilon(t) \longleftrightarrow \frac{1}{s}$ .

Verwenden Sie die Gesetzmäßigkeiten der Laplace-Transformation, um die Bildfunktion folgender Signale abzuleiten:

- a)  $\delta(t)$
- b)  $\rho(t)$
- c)  $\varepsilon(t) \cdot t^2$ .

Aufgabe 2.2-9: Wie lautet die Bildfunktion des dargestellten Signals?

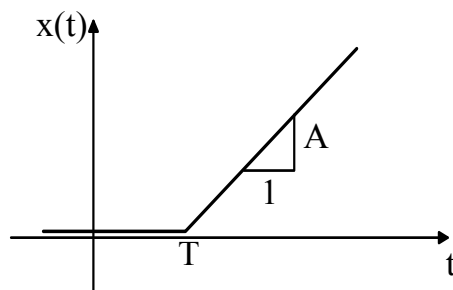

Geben Sie das PN-Schema dieses verzögerten Rampensignals an!

Aufgabe 2.2-10: Die Funktion  $x(t)$  ist folgendermaßen definiert:

$$x(t) = \sum_{n=-\infty}^{\infty} \delta(t - nT)$$

Stellen Sie diese Funktion graphisch dar!

Bestimmen Sie die Fourier-Transformierte  $X(j\omega)$ !

## 2.3 Beschreibungsmethoden für Systeme

Aufgabe 2.3-1: Berechnen Sie die Gesamtübertragungsfunktion des abgebildeten Systems!

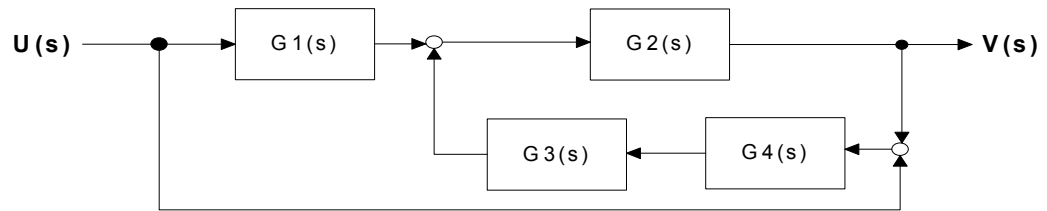

Abbildung 2.3-1: Wirkungsplan

Aufgabe 2.3-2: Ein System besitzt die Übertragungsfunktion  $G(s) = \frac{1}{1+s}$ .

- Wie lautet seine Gewichtsfunktion?
- Skizzieren Sie die Impulsantwort des Systems!
- Welcher Systemtyp liegt vor?

Aufgabe 2.3-3: Entwickeln Sie die Wirkschaltpläne für die abgebildeten RC-Filter!

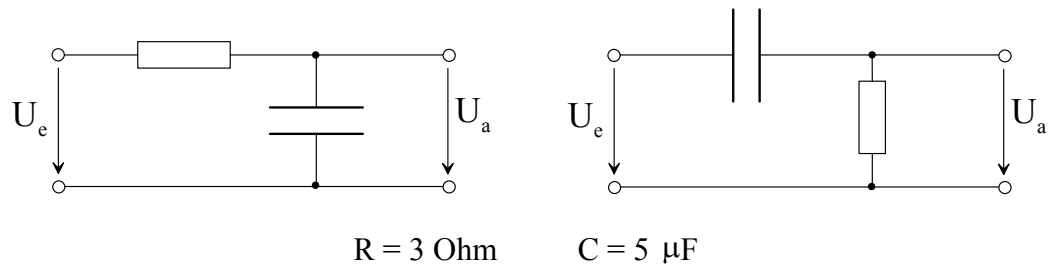

Abbildung 2.3-2: RC-Filter

Aufgabe 2.3-4: Der elektropneumatische Wandler dient der Umformung von Drucksignalen auf eine elektrische Spannung. Sein Prinzip wird in der nachfolgenden Abbildung verdeutlicht.

Zeichnen Sie sein Wirkschaltbild!

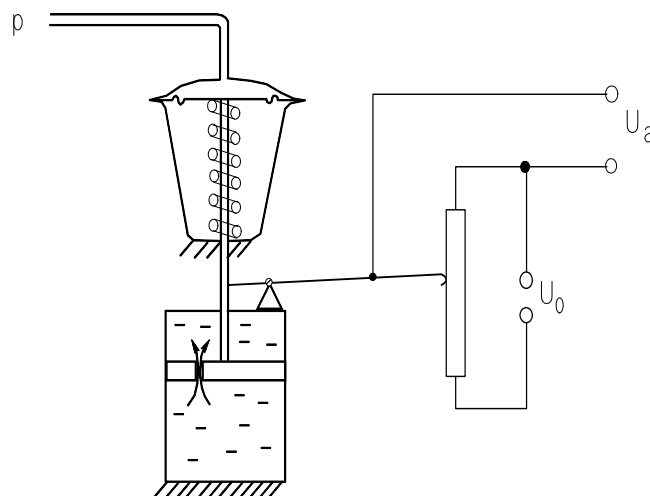

Abbildung 2.3-3: Elektropneumatischer Wandler



Aufgabe 2.3-5: Erstellen Sie ein Blockschaltbild des abgebildeten Pendels. Als Eingangsgröße dient die horizontale Kraft  $F(t)$ , als Ausgangsgröße der Winkel  $\alpha(t)$ . Bezeichnen Sie die Übertragungsglieder mit ihren mathematischen Funktionen (auch wenn sie nichtlinear sind). Der Stab sei dabei masselos, jede Reibung ausgeschlossen und keine Corioliskraft vorhanden.

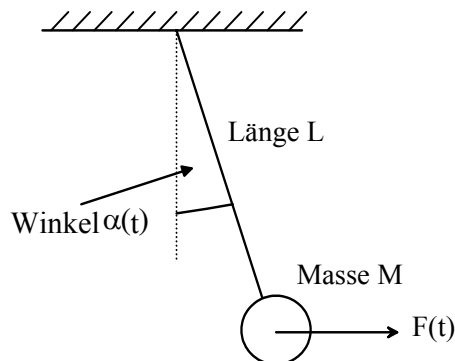

Abbildung 2.3-4:  
Pendel

Aufgabe 2.3-6: Stellen Sie den Wirkschaltplan des abgebildeten mechanischen Systems eines auf einer Seite unterstützten Hebels auf. Als Eingangsgröße wirke die Kraft  $F(t)$ . Die Ausgangsgröße sei die Geschwindigkeit  $v(t)$ . Der Hebel wird als starr und masselos angenommen.

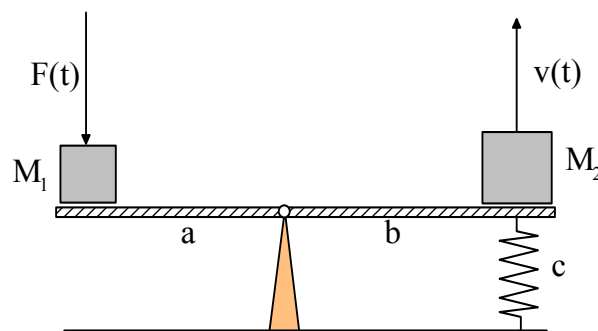

Abbildung 2.3-5:  
Masse-Feder-  
Hebelsystem

Aufgabe 2.3-7: Die Abbildung zeigt einen Behälter für Flüssigkeiten. Durch eine zusätzliche Regelung soll das Flüssigkeitsniveau  $N$  konstant gehalten werden. Durch den Ventilhub  $h$  wird die Zuflussmenge  $Q_{zu}$  eingestellt. Die Zuflussmenge  $Q_{zu}$  soll proportionales Verhalten zum Ventilhub aufweisen. Die abfließende Flüssigkeitsmenge  $Q_{ab}$  ist unabhängig vom Niveau  $N$ .

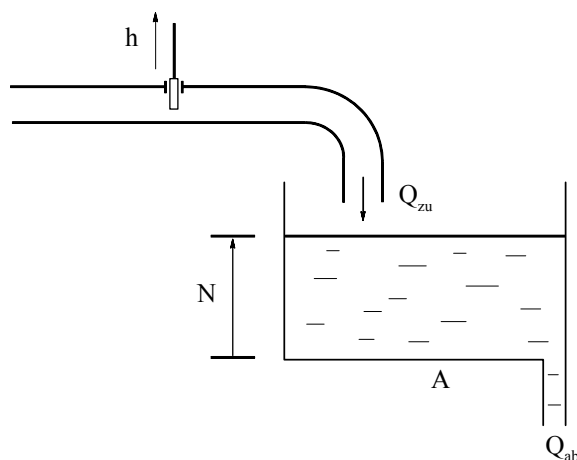

Abbildung 2.3-6:  
Behältersystem

(a) Stellen Sie die Systemgleichung zwischen Eingangsgröße  $h$  und Ausgangsgröße  $N$  auf. Welcher Typ von System liegt vor?

(b) Für die Systemgrößen sei ein Betriebspunkt oder Arbeitspunkt vorgegeben:

$$N = N_0 + \Delta N, \quad h = h_0, \quad Q_{zu} = Q_{zu}^0 \quad \text{und} \quad Q_{ab} = Q_{ab}^0.$$

Schreiben Sie die Systemgleichung aus (a) um, so dass die modifizierte Gleichung für die Größen  $\Delta N$ ,  $\Delta h$ ,  $\Delta Q_{zu}$  und  $\Delta Q_{ab}$  um den Betriebspunkt gilt!

- (c) Der Abfluss  $Q_{ab} = Q_{ab}^0 + \Delta Q_{ab}$  wirkt als zweite Eingangsgröße auf das System. Geben Sie die Systemgleichung für  $\Delta Q_{ab}$  als Eingangsgröße und  $\Delta N$  als Ausgangsgröße an. Dazu sei  $\Delta h = 0$  angenommen.
- (d) Zeichnen Sie einen Blockschaltplan des Systems!

Aufgabe 2.3-8: Gegeben sei ein Druckluftspeicher. Dieser wird über ein Zuflussventil mit der typischen Kennlinie  $\dot{m}(t) = k_v \cdot \sqrt{\Delta p(t)}$  versorgt.

- (a) Stellen Sie die Systemgleichungen mit  $p_e$  als Eingangssignal und  $p_B$  als Ausgangssignal auf!
- (b) Linearisieren Sie die Systemgleichung aus (a) um die Betriebsdrücke  $p_e^0$  und  $p_B^0$ !
- (c) Zeichnen Sie den Wirkschaltplan!

Aufgabe 2.3-9: In nachfolgendem Diagramm sind die Pol- und Nullstellen eines Systems eingetragen:

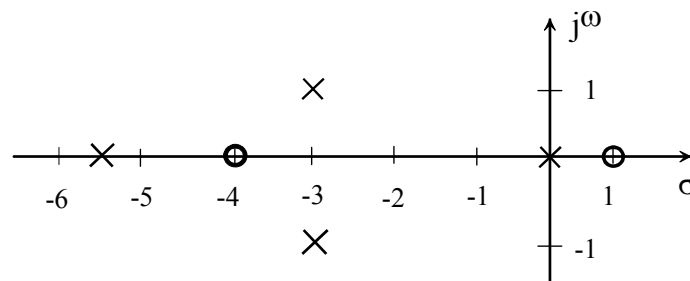

Abbildung 2.3-7:  
PN-Schema

Ermitteln Sie aus dem Diagramm die Übertragungsfunktion  $G(s)$  der Regelstrecke!

Aufgabe 2.3-10: Ein System hat die Übertragungsfunktion:  $G(s) = \frac{20(1-s)}{s(s+2)(s+10)}$ .

- a) Zeichnen Sie den Pol-Nullstellenplan des Systems!
- b) Liegt ein stabiles System vor?

# 3 Regelungstechnik

## 3.1 Grundbegriffe und Aufgaben von Regelungen

Aufgabe 3.1-1: Ein Eisenbahnzug soll eine bestimmte Strecke mit einer vorgegebenen Geschwindigkeit durchfahren, die unabhängig von Störungen konstant eingehalten werden muss, damit der Fahrplan nicht durcheinander gerät. Der Zug und der Lokomotivführer bilden zusammen einen Regelkreis.

- Stellen Sie den Wirkungsplan für den Geschwindigkeitsregelkreis auf.
- Beschreiben Sie die Stelleinrichtung, mit welcher der Lokführer die Geschwindigkeit beeinflusst und die Messeinrichtung, mit der die Geschwindigkeit gemessen und angezeigt wird!
- Benennen Sie die Störgrößen!
- Auf welche Weise wirken die Störgrößen auf die Regelstrecke ein?
- Versuchen Sie die Regelstrecke so in einzelne Blöcke aufzuteilen, dass man sowohl den Einfluss der Stellgröße als auch den der Störgrößen im Wirkungsplan verfolgen kann!

Aufgabe 3.1-2: In der Umgangssprache spricht man normalerweise vom "Steuern" eines Boots. Die Systemtheorie spricht bei dieser Tätigkeit jedoch von einem Regelungs- und keinem Steuerungsvorgang.

- Begründen Sie diese Aussage!
- Skizzieren Sie die Kursregelung eines Boots in einem Wirkungsplan anhand der folgenden Bootsdarstellung!

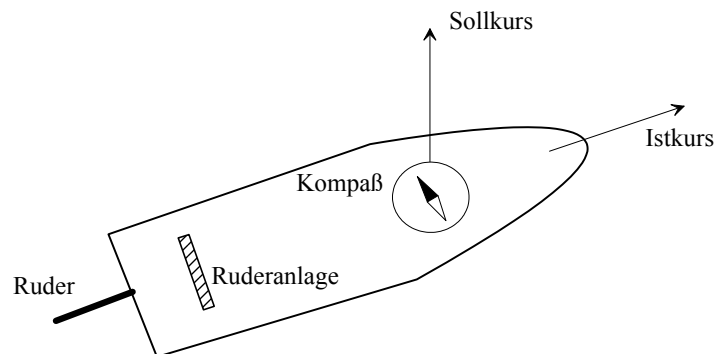

- Benennen Sie alle regelungstechnischen Systemkomponenten und Signale dieses Regelkreises!

Aufgabe 3.1-3: Zur Regelung des Druckes in einem Behälter dient die nachfolgend abgebildete Geräteanordnung:

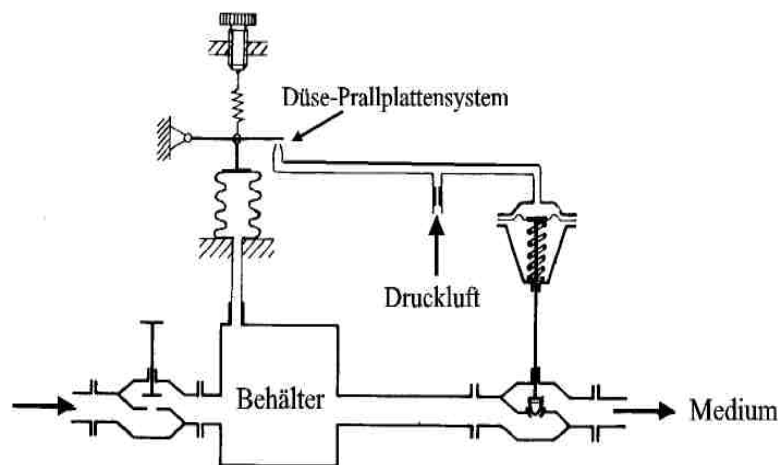

Abbildung 3.1-1: Druckregelung

Der Druckbehälter wird durch eine Druckleitung versorgt. Die Konstanzhaltung des Drucks im Druckbehälter soll über die Abflussleitung mit Hilfe der übrigen Geräteeinheiten erreicht werden.

- Beschreiben Sie kurz die Wirkungsweise der Anlage aus regelungstechnischer Sicht!
- Benennen Sie alle regelungstechnischen Einheiten und Signale des abgebildeten Regelkreises!

Aufgabe 3.1-4: Die angegebene gerätetechnische Skizze zeigt die Arbeitsweise einer Dampfmaschine zum Antrieb einer Arbeitsmaschine.

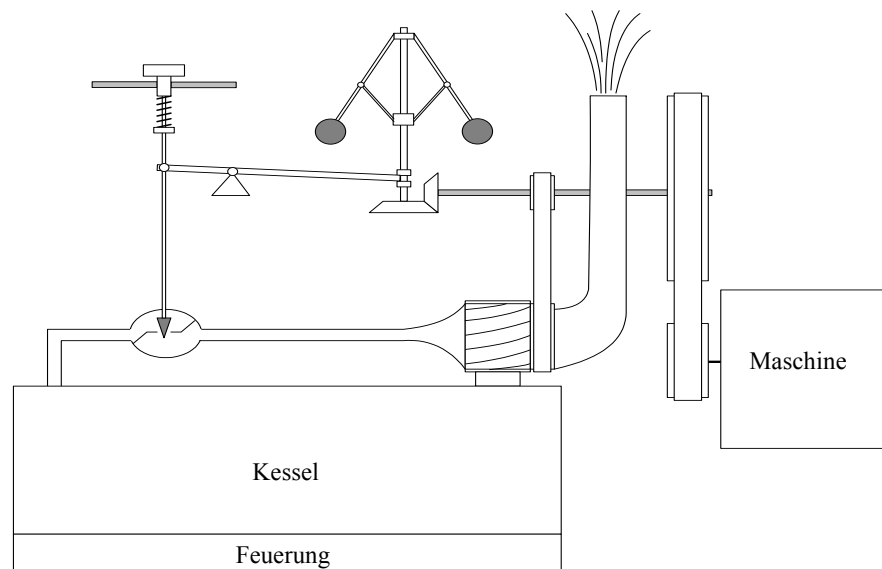

Abbildung 3.1-2: Dampfmaschine

Geben Sie an, welche Bauelemente und physikalischen Größen den allgemeinen regelungstechnischen Grundbegriffen entsprechen!

Aufgabe 3.1-5: Die abgebildete Anlage stellt eine Warmwasseraufbereitungsanlage dar.

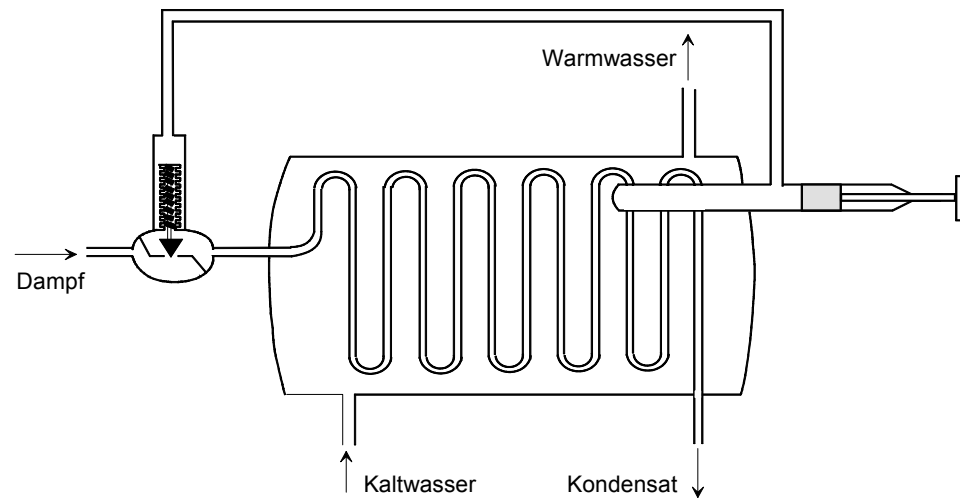

Abbildung 3.1-3: Warmwasseranlage

- Beschreiben Sie stichwortartig die Wirkungsweise der Anlage!
- Liegt ein Regelkreis vor? (mit Begründung)
- Leiten Sie aus dem Anlagenschema das Wirkschaltbild ab, aus dem alle Komponenten des Regelkreises hervorgehen!
- Benennen Sie die Signale und Komponenten des Regelkreises !
- Schätzen Sie das Zeitverhalten der Teilsysteme des Regelkreises ab (mit Begründung)!

Aufgabe 3.1-6: Die nachfolgende Abbildung zeigt einen Drehzahlregelkreis.

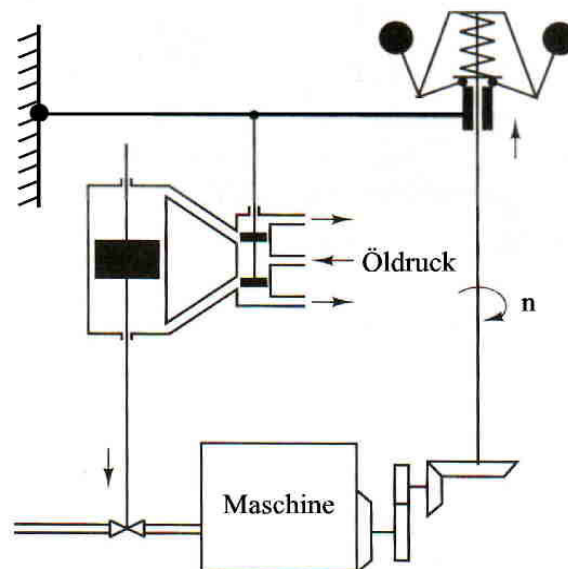

- Beschreiben Sie kurz die Wirkungsweise der Anlage aus regelungstechnischer Sicht!

- b) Zeichnen Sie den Wirkungsplan und benennen Sie alle Komponenten und Signale des Drehzahlregelkreises!

|                  |  |
|------------------|--|
| Aufgabengröße    |  |
| Regelgröße       |  |
| Sollgröße        |  |
| Führungsgröße    |  |
| Stellgröße       |  |
| Eingriffsgröße   |  |
| Störgrößen       |  |
| Regelstrecke     |  |
| Messeinrichtung  |  |
| Stelleinrichtung |  |
| Regeleinrichtung |  |

- c) Geben Sie die dynamischen Eigenschaften der einzelnen Regelkreiskomponenten an !

|                  | Dynamik |
|------------------|---------|
| Regelstrecke     |         |
| Messeinrichtung  |         |
| Stelleinrichtung |         |
| Regeleinrichtung |         |

Aufgabe 3.1-7: In der Textilindustrie erleiden Stoffbahnen beim Aufbereiten Längenänderungen. Daher führt man Stoffbahnen über Walzen und lässt sie zwischen den Walzen durchhängen. So vermeidet man eine Faltenbildung und ein Reißen der Stoffbahn, weil der Durchhang die Längenänderung aufnimmt. Der Durchhang verändert sich, wenn die zuführenden und abführenden Walzen verschiedene Drehzahlen aufweisen. Über eine Lichtmessanordnung kann der Durchhang bestimmt werden.

- a) Vervollständigen Sie das Technologieschema so, dass ein Regelkreis zur Regelung der Drehzahl der abführenden Walze entsteht!

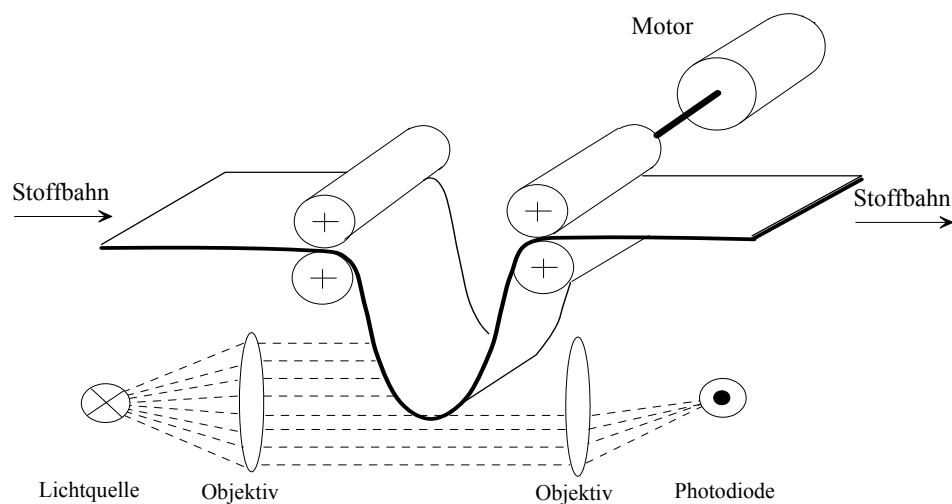

- b) Benennen Sie alle regelungstechnischen Systemkomponenten und Signale des Regelkreises!  
 c) Schätzen Sie das dynamische Verhalten der Regelstrecke ab!

## 3.2 Regelstrecken und Regeleinrichtungen

Aufgabe 3.2-1: Auf einen einschleifigen Regelkreis wirkt eine sprungförmige Störung.

- Skizzieren Sie das ideale Zeitverhalten der Ausgangsgröße des Regelkreises in ein Zeitdiagramm!
- Wie sieht das reale Zeitverhalten des Regelkreises aus, wenn ein möglichst optimaler Regler vorhanden ist?

Aufgabe 3.2-2: Ein Regler erzeugt bei sprungförmiger Erregung die abgebildete Antwort.

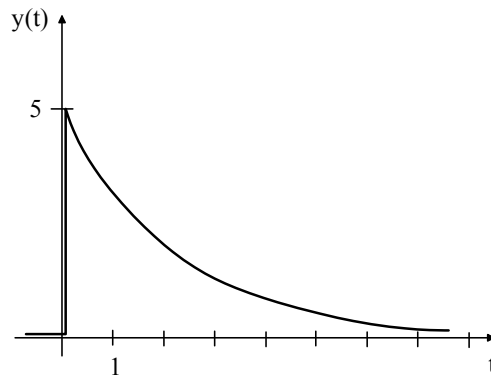

- Welches Verhalten besitzt der Regler?
- Welche Kennwerte besitzt das System? Ermitteln Sie deren Werte aus dem Diagramm!

Berechnen Sie dazu das Ausgangssignal des Systems im Bildbereich mit anschließender Transformation in den Zeitbereich. Aus dem Signalverlauf können Sie dann auf die Größe der Kennwerte schließen.

Aufgabe 3.2-3: Ein Regler reagiert auf das vorgegebene Eingangssignal  $e(t)$  mit dem Ausgangssignal  $y(t)$ .

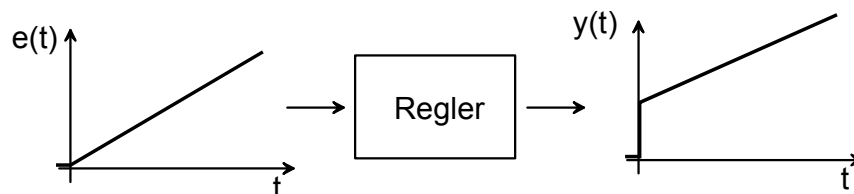

Welcher Reglertyp liegt vor?

Begründen Sie Ihre Angaben!

Aufgabe 3.2-4: Mit einem Schreiber wurde die folgende Sprungantwort einer Regelstrecke aufgenommen:

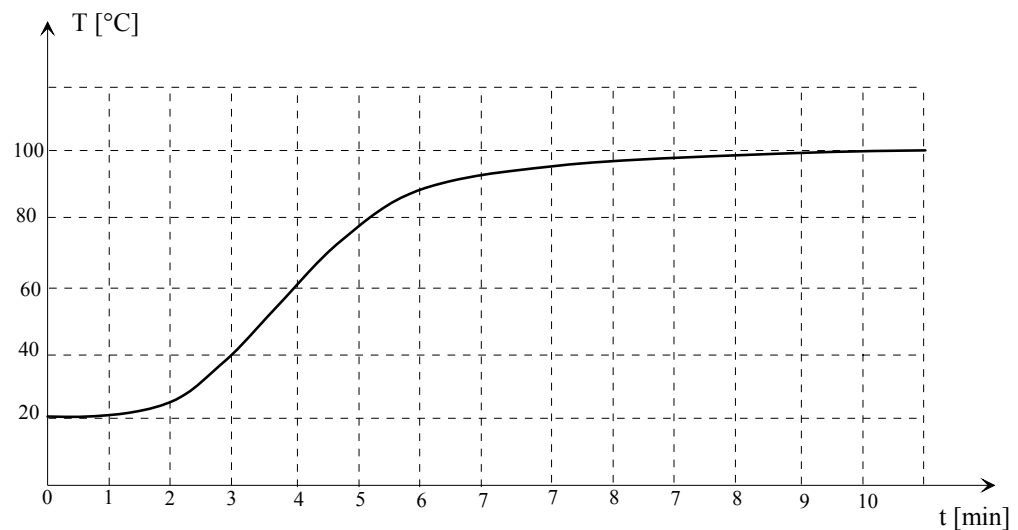

- Bestimmen Sie die Verzugs- und Ausgleichszeit!
- Wie beurteilen Sie die Regelbarkeit dieser Regelstrecke?  
Begründen Sie Ihre Einschätzung!

Aufgabe 3.2-5: Warum sollen die Mess- und Stelleinrichtung eines Regelkreises sehr schnell reagieren?

Aufgabe 3.2-6: Bei welchem Regler ändert sich die Stellgröße proportional zur Änderungsgeschwindigkeit der Regeldifferenz?

Aufgabe 3.2-7: Erläutern Sie, warum ein Proportionalregler bei einem Führungssprung eine bleibende Regeldifferenz hinterlässt, wenn die Regelstrecke selbst keine integrierende Wirkung besitzt!

Aufgabe 3.2-8: Eine unbekannte Regelstrecke wird mit einem P-Regler geregelt. Dabei wird die Verstärkung des Reglers so eingestellt, dass der Regelkreis stabil ist.

Es stellt sich heraus, dass beim Betrieb des Regelkreises eine stationäre Regeldifferenz gleich Null auf einen Führungssprung resultiert.

Welche Eigenschaften muss die Regelstrecke demzufolge aufweisen?

Begründen Sie Ihre Angaben!

Aufgabe 3.2-9: Geben Sie zwei Beispiele von Regelstrecken ohne Ausgleich an!

Aufgabe 3.2-10: Eine Regelstrecke wird mit einem Zweipunktregler geregelt. Es wird dabei beobachtet, dass die Regelgröße  $x(t)$  geradlinig um die Führungsgröße hin- und herschwingt.

Für welche Art von Regelstrecke trifft diese Beobachtung zu?

Aufgabe 3.2-11: Zur Regelung einer Temperaturstrecke wird ein PI-Regler verwendet. Das Ventil der Gaszufuhr des Ofens besitzt einen Stellbereich von  $Y_h = 30 \text{ mm}$ . Der Proportionalbereich ist auf  $X_p = 400^{\circ}\text{C}$  festgelegt. Der I-Regler besitzt den Integrierbeiwert

$$K_{\text{IR}} = 0,1 \frac{\text{mm}}{\text{min} \cdot ^{\circ}\text{C}}.$$

Berechnen Sie die Nachstellzeit des PI-Reglers!



Aufgabe 3.2-12: In nachfolgender Abbildung sind Zeitverläufe von Regelstrecken dargestellt.

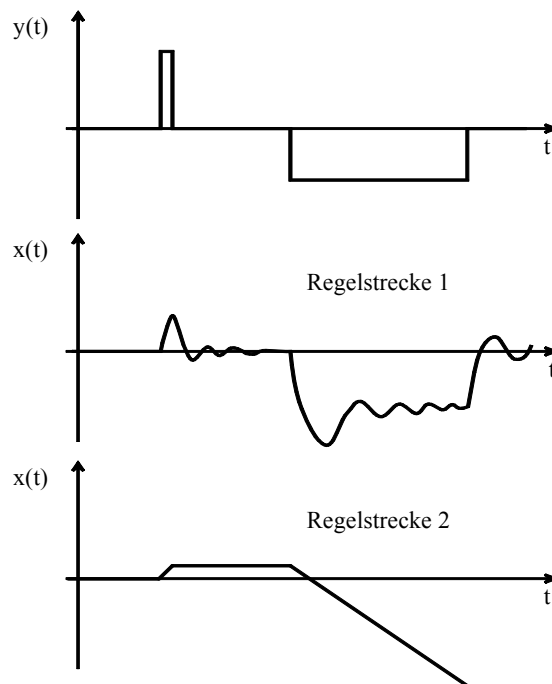

Das erste Signal zeigt das Stellsignal  $y(t)$  der erweiterten Regelstrecke. Die anderen geben die Antwortsignale  $x(t)$  zweier Strecken wieder.

Welche Art von Regelstrecken liegen vor?

Geben Sie den Typ ihrer Zeitverhalten an!

Aufgabe 3.2-13: Beschreiben Sie die exakten Begrenzungen zwischen der Regeleinrichtung und der Regelstrecke eines Regelkreises!

### 3.3 Der Standard-Regelkreis

Aufgabe 3.3-1: Gegeben sei eine  $P-T_n$ -Regelstrecke, die von einem P-Regler geregelt wird.

- Wie groß muss die Kreisverstärkung  $V_0$  dieses Regelkreises sein, damit die bleibende Regelabweichung  $e_s$  kleiner gleich 10 % vom Sollwert ist?
- Wie wirkt sich eine hohe Kreisverstärkung  $V_0$  auf die Größe des statischen Regelfaktors  $r$  aus?

Aufgabe 3.3-2: Bei welchem Regelstreckentyp ist ein PD-Regler aus Genauigkeitsgründen ausreichend und warum?

Aufgabe 3.3-3: Welcher Kennwert bewertet die Genauigkeit eines Regelkreises im stationären Zustand?

Aufgabe 3.3-4: Erläutern Sie, warum ein Proportionalregler bei einem Führungssprung eine bleibende Regeldifferenz hinterlässt, wenn die Regelstrecke selbst keine integrierende Wirkung besitzt!

Aufgabe 3.3-5: Eine unbekannte Regelstrecke wird mit einem P-Regler geregelt. Dabei wird die Verstärkung des Reglers so eingestellt, dass der Regelkreis stabil ist. Es stellt sich dann heraus, dass beim Betrieb des Regelkreises eine verschwindende stationäre Regeldifferenz auf einen Führungssprung resultiert.

Welche Eigenschaften weist die Regelstrecke auf?

Begründen Sie Ihre Angaben!

Aufgabe 3.3-6: Was bezweckt man mit einem D-Anteil in einem Regler?  
Geben Sie Beispiele für dessen Verwendung an!

Aufgabe 3.3-7: Welcher Kennwert bewertet die Genauigkeit einer Festwertregelung im stationären Zustand?

Aufgabe 3.3-8: Ein temperaturgeregelter Ofen ist eine Regelstrecke 1. Ordnung. Ohne Reglereingriff stellt sich in Ofenraum eine Beharrungstemperatur von 450 °C ein. Durch den Eingriff eines P-Reglers wird bei der Sollwerteinstellung von 350°C ein neuer Beharrungswert von 316°C nach kurzem Überschwingen erreicht.

- Wie groß ist der statische Regelfaktor  $r$  bei dieser Einstellung?
- Wie groß ist die Kreisverstärkung?

Aufgabe 3.3-9: In der Textilindustrie erleiden Stoffbahnen beim Aufbereiten Längenänderungen. Daher führt man Stoffbahnen über Walzen und lässt sie zwischen den Walzen durchhängen. So vermeidet man die Faltenbildung und das Reißen der Stoffbahn, weil der Durchhang die Längenänderung aufnimmt. Der Durchhang verändert sich, wenn die zuführenden und abführenden Walzen verschiedene Drehzahlen aufweisen. Über eine Lichtmessanordnung kann der Durchhang bestimmt werden.

- Vervollständigen Sie das Geräteschaltbild so, dass ein Regelkreis zur Regelung der Drehzahl der abführenden Walze entsteht!

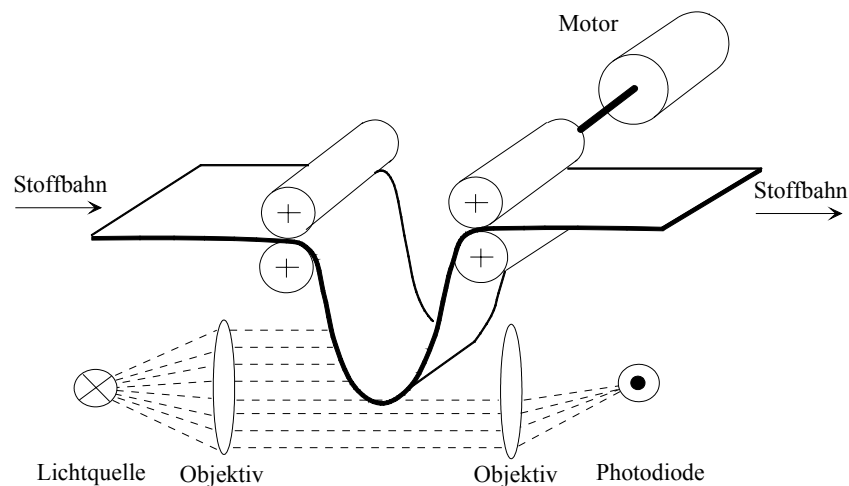

- Beschreiben Sie kurz die Funktionsweise Ihres Regelkreises!
- Welche Art von Regelstrecke liegt hier vor?
- Welchen Reglertyp schlagen Sie zur Regelung vor? Begründen Sie Ihre Auswahl!

Aufgabe 3.3-10: Eine Regelstrecke verhält sich wie ein Totzeit-System mit  $T_t = 1$  sec. Sie wird mit einem P-Regler geregelt:

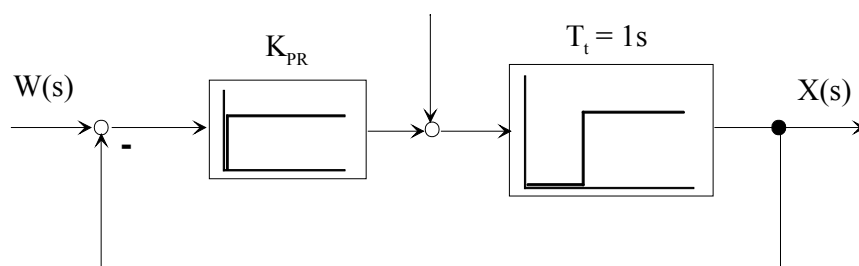

- Skizzieren Sie das Antwortsignal auf einen Führungssprung  $w(t)$  mit der Amplitude Eins!
- Wie lautet die Übertragungsfunktion des offenen Regelkreises?

Aufgabe 3.3-11: Gegeben sei ein Regelkreis mit I-T<sub>1</sub>-Regelstrecke und P-Regler nach folgendem Wirkungsplan:

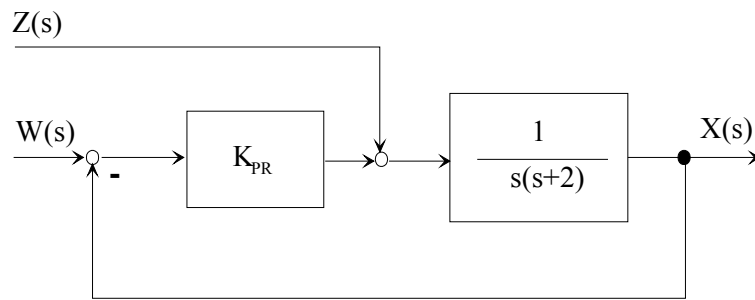

Bestimmen Sie den Proportionalbeiwert  $K_{PR}$  des Reglers so, dass der Dämpfungsgrad des Regelkreises  $D = \frac{1}{2}$  beträgt!

**Anmerkung:** Stellen Sie die Führungsübertragungsfunktion des Regelkreises auf und vergleichen Sie diese mit der Übertragungsfunktion eines P-T<sub>2</sub>-Systems!

### 3.4 Stabilität von Regelkreisen

Aufgabe 3.4-1: Es ist eine Regelstrecke mit folgender Übertragungsfunktion gegeben:

$$G_s(s) = \frac{s-1}{(1+s)(1+0,5 \cdot s)}$$

Für einen PI-Regler mit der Übertragungsfunktion

$$G_R(s) = K_{PR} \left( 1 + \frac{1}{s} \right)$$

soll der Wertebereich für die Reglerv Verstärkung  $K_{PR}$  angegeben werden, für den der Regelkreis stabil ist. Verwenden Sie zur Berechnung dieses Bereichs das WOK-Verfahren!

Aufgabe 3.4-2: Ein offener Regelkreis besitzt die Übertragungsfunktion:

$$G_0(s) = K_{PR} \frac{s-2}{s+12}$$

Für welche  $K_{PR}$  ist der geschlossene Regelkreis stabil?

Aufgabe 3.4-3: Mit welchen Kennwerten kann man die Schnelligkeit einer Regelung beschreiben?

Zeigen Sie insbesondere die Zusammenhänge zwischen den verschiedenen Kennwerten und den Regelkreisdarstellungen im Frequenz- und Bildbereich auf!

Aufgabe 3.4-4: Von einer Regelung kennt man die Nyquist-Kurve des offenen Kreises für eine Verstärkung im Regler  $K_{PR} = 0,6$ .

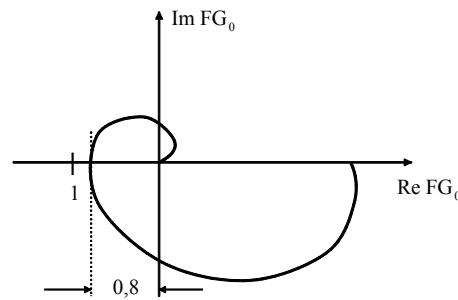

Bei welcher Reglerverstärkung  $K_{PR}$  wird die Regelung instabil?

Aufgabe 3.4-5: Es ist ein einschleifiger Standard-Regelkreis mit den beiden Übertragungsfunktionen

$$G_S(s) = \frac{s+1}{s^2+2s+5} \quad \text{und} \quad G_R(s) = \frac{K_{PR}}{s+1}$$

gegeben. Die Reglerverstärkung  $K_{PR}$  kann in diesem Fall positive und negative Werte annehmen.

a) Beurteilen Sie das Stabilitätsverhalten des Regelkreises mit dem WOK-Verfahren!

Geben Sie die Stabilitätsbedingung für  $K_{PR}$  der beiden Fälle

$$K_{PR} \geq 0 \quad \text{und} \quad K_{PR} < 0$$

an!

Zeichnen Sie dazu die WOK der beiden Fälle mit unterschiedlichen Farben in ein WOK-Diagramm ein!

b) Welche Art Rückkopplung liegt für die Fälle

$$K_{PR} \geq 0 \quad \text{und} \quad K_{PR} < 0$$

vor?

Aufgabe 3.4-6: Ein Regelkreis besteht aus einem P-Regler mit dem Verstärkungsfaktor  $K_{PR}$  und einer Regelstrecke mit der Übertragungsfunktion

$$G_S(s) = \frac{1}{s-1}$$

Der Frequenzgang des offenen Regelkreises lautet deshalb:

$$FG_0(j\omega) = \frac{K_{PR}}{j\omega - 1}$$

mit dem Nyquist-Diagramm

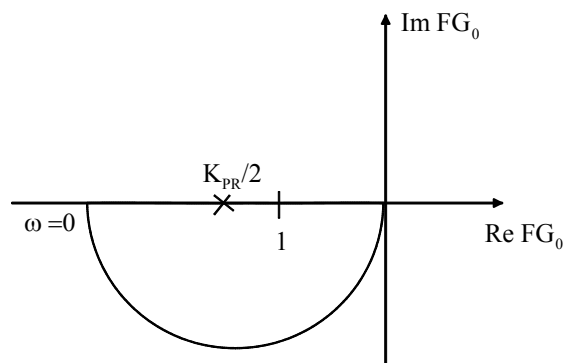

Die Nyquist-Kurve entspricht einem Halbkreis im 3. Quadranten mit Kreismittelpunkt bei  $-K_{PR}/2$ . Ihr Ausgangspunkt ( $\omega=0$ ) liegt auf der negativ reellen Achse.

- Liegt ein stabiler Regelkreis vor?  
Wenn ja, geben Sie den Wertebereich für  $K_{PR}$  an, für den Stabilität gegeben ist!  
Begründen Sie Ihre Angaben!
- Überprüfen Sie die Stabilität des angegebenen Regelkreises mit dem WOK-Verfahren!

Aufgabe 3.4-7: Ein Regelkreis besteht aus einem P-Regler mit dem Verstärkungsfaktor  $K_{PR}$  und einer Regelstrecke mit der Übertragungsfunktion

$$G_s(s) = \frac{8}{1 + 8 \cdot s^2}.$$

- Untersuchen Sie die Stabilität dieses Regelkreises mit Hilfe des Nyquist-Verfahrens. Zeichnen Sie dazu die Ortskurve des offenen Regelkreises auf.
- Bestimmen Sie die Wurzelortskurve (WOK) des Regelkreises!

Aufgabe 3.4-8: Ein Regelkreis setzt sich aus der Regelstrecke mit der Übertragungsfunktion

$$G_s(s) = \frac{4}{s(s+4)}$$

und einem P-Regler zusammen.

Geben Sie den Stabilitätsbereich für  $K_{PR}$  dieses Regelkreises mit Hilfe des WOK-Verfahrens an!

## 3.5 Regelkreisentwurf

Aufgabe 3.5-1: Von einer Regelstrecke ist ihre Übertragungsfunktion

$$G_s(s) = \frac{2}{s(s^2 + 6 \cdot s + 8)}$$

bekannt.

Lässt sich die Regelstrecke mit einem P-Regler stabilisieren?

Wenn ja, sind dann Einschränkungen für die Reglerverstärkung  $K_R$  notwendig?

Beantworten Sie die Fragen mit Hilfe der WOK des Regelkreises!

Aufgabe 3.5-2: Begründen Sie anhand der Ortskurve des offenen Regelkreises, dass eine Regelstrecke mit P-T<sub>2</sub>-Verhalten von einem P-Regler stabiler geregelt wird als von einem I-Regler!

Aufgabe 3.5-3: Von einer zu regelnder Anlage wurde der Amplitudengang messtechnisch erfasst. Er ist in nachfolgendem Diagramm als  $FG_s(j\omega)$  gekennzeichnet.

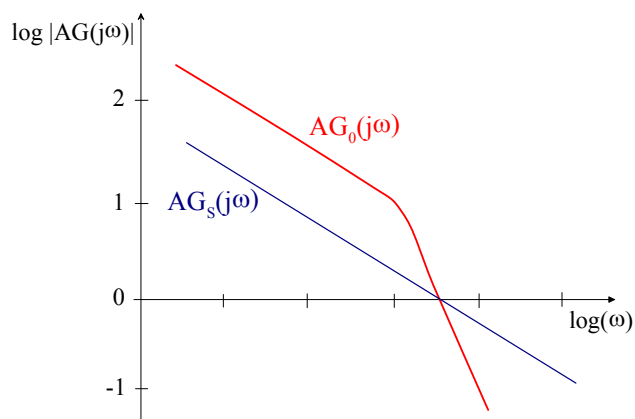

Der Regelkreis soll ein P-T<sub>1</sub>-Führungsverhalten besitzen. Der Frequenzgang des offenen Kreises muss dann ein I-T<sub>1</sub>-Verhalten aufweisen. Der Amplitudengang  $FG_0(j\omega)$  des offenen Regelkreises ist ebenfalls im obigen Frequenzdiagramm dargestellt.

Entwerfen Sie den Regler für das geforderte Regelkreis-Verhalten!

Welcher Regler erfüllt die Regelanforderungen?

Aufgabe 3.5-4: Von einer Regelstrecke sei deren Übertragungsfunktion gegeben:

$$G_s(s) = \frac{2}{(s+1,5 \cdot s)(s+0,6 \cdot s)(s+0,1 \cdot s)}.$$

Entwerfen Sie einen geeigneten Regler mit dem Verfahren der dynamischen Kompensation!

Aufgabe 3.5-5: Die Übertragungsfunktion einer Regelstrecke ist:

$$G_s(s) = \frac{1}{s(s^2 + 4 \cdot s + 5)}.$$

Zeichnen Sie die WOK des Regelkreises für einen einfachen P-Regler!

Liegt ein stabiler Regelkreis vor?

Aufgabe 3.5-6: Eine Temperaturstrecke besitzt folgende Sprungantwort:

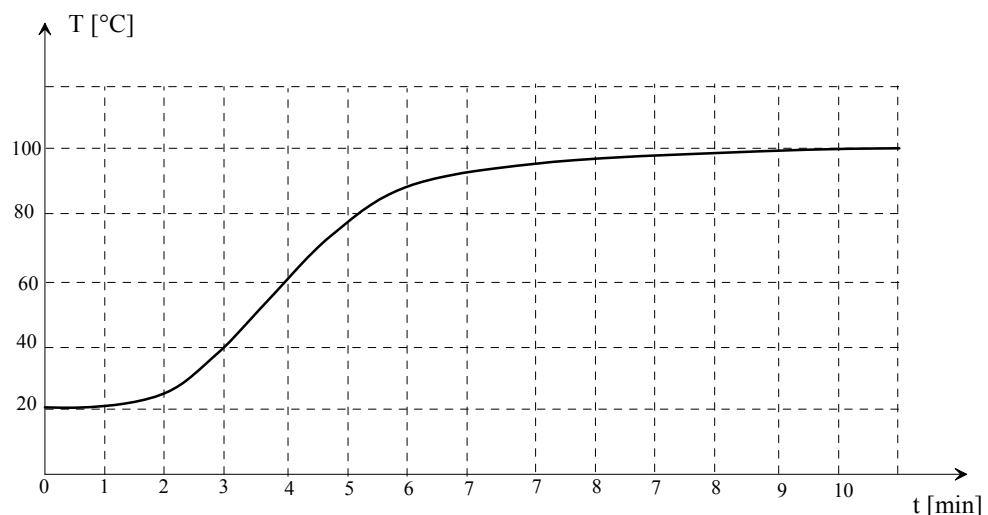

Entwerfen Sie einen PID-Regler zur Regelung der Temperaturstrecke!

## 4 Steuerungstechnik

### 4.1 Grundbegriffe der Steuerungstechnik

Aufgabe 4.1-1: Der Arbeitsablauf von Werkzeugmaschinen kann über Nocken und Kreuzschienenverteiler eingestellt werden. In der nachfolgenden Abbildung wird eine Fräsmaschine mit Nockensteuerung dargestellt:

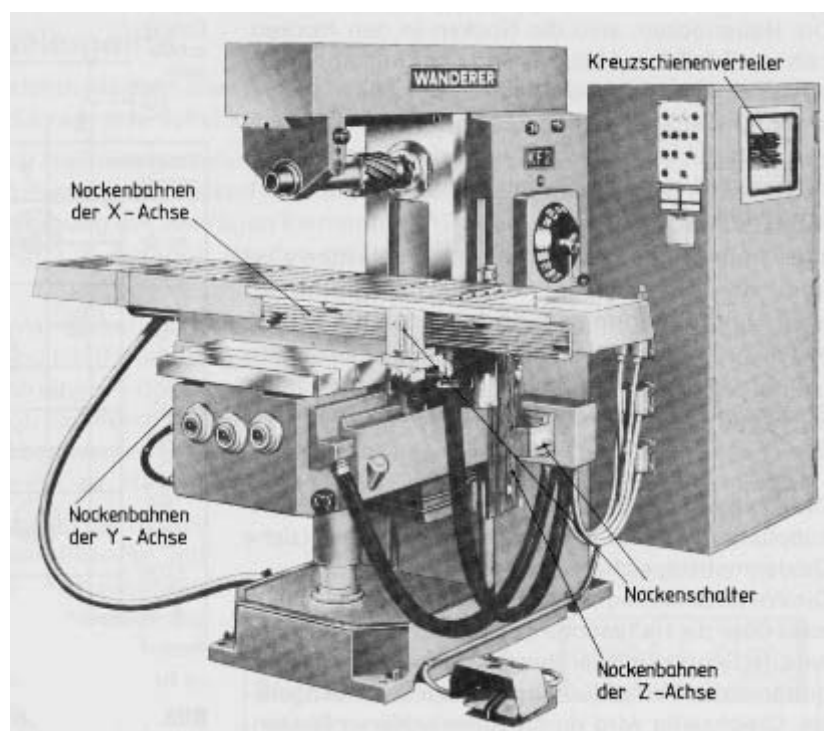

Versuchen Sie einen Wirkschaltplan der Maschinensteuerung zu skizzieren!

Welche Art von Steuerung liegt vor?

Aufgabe 4.1-2: Über ein Transportband werden unterschiedlich lange Werkstücke transportiert. Ein Lichtbandsensor erkennt die Werkstücklänge. Die Werkstücke sollen nach ihrer Länge sortiert werden. Der Einfachheit wegen werden zwei Kategorien gebildet. Eine Weiche separiert die Werkstücke. Zeichnen Sie den Wirkungsplan der Steuerung!

### 4.2 Steuerungsarten

Aufgabe 4.2-1: Mit welcher Art Steuerung lässt sich das Kopierfräsen realisieren?

Zeichnen Sie dazu ein Technologieschema!

Aufgabe 4.2-2: NC-Werkzeugmaschinen werden von Steuerungen (NC Numerical Controlled) geführt.

Welche Art von Steuerung verbirgt sich hinter diesem Begriff?

### 4.3 Methoden und Verfahren

Aufgabe 4.3-1: Eine Maschine wird durch einen Drehschalter ein- bzw. ausgeschaltet. Während des Betriebs kann eine Überhitzung auftreten. Ein Grenzschalter, verbunden mit einem Temperaturfühler, registriert diese Überhitzung. Tritt sie ein, soll ein Lüfter für 10 Minuten eingeschaltet werden. Entwickeln Sie einen Logikplan, der diese Anforderungen erfüllt!

Aufgabe 4.3-2: Zeichnen Sie den Logik- und Kontaktplan für eine Steuerung mit der Schaltfunktion:

$$A = E1 \wedge E2 \wedge (E3 \wedge \overline{E4} \vee \overline{E3} \wedge E4) \vee E4 \wedge E3 \wedge (E1 \wedge E2 \vee \overline{E1} \wedge \overline{E2}) !$$

Aufgabe 4.3-3: Für eine Steuerungsaufgabe ist folgende Schaltbelegungstabelle gegeben:

| Feld-Nr. | E4 | E3 | E2 | E1 | A |
|----------|----|----|----|----|---|
| 00       | 0  | 0  | 0  | 0  | 0 |
| 01       | 0  | 0  | 0  | 1  | 0 |
| 02       | 0  | 0  | 1  | 0  | 0 |
| 03       | 0  | 0  | 1  | 1  | 0 |
| 04       | 0  | 1  | 0  | 0  | 1 |
| 05       | 0  | 1  | 0  | 1  | 1 |
| 06       | 0  | 1  | 1  | 0  | 1 |
| 07       | 0  | 1  | 1  | 1  | 1 |
| 10       | 1  | 0  | 0  | 0  | 1 |
| 11       | 1  | 0  | 0  | 1  | 0 |
| 12       | 1  | 0  | 1  | 0  | 0 |
| 13       | 1  | 0  | 1  | 1  | 1 |
| 14       | 1  | 1  | 0  | 0  | 1 |
| 15       | 1  | 1  | 0  | 1  | 1 |
| 16       | 1  | 1  | 1  | 0  | 1 |
| 17       | 1  | 1  | 1  | 1  | 1 |

Stellen Sie die Schaltfunktion der Steuerung auf!

Minimieren Sie die Funktion mit Hilfe des KV-Verfahrens!

Aufgabe 4.3-4: Die Zweihandverriegelung verlangt bei Maschinen u. a., dass die Bedienperson innerhalb einer vorgegebenen Zeitdauer zwei Tastschalter S1 und S2 betätigt, wobei die Taster in ausreichendem Abstand voneinander entfernt sind. Die Maschine führt den Arbeitsgang nicht aus, wenn einer oder beide Tastschalter dauernd betätigt sind. Die Tasterbetätigungen darf während des Arbeitsvorgangs ebenfalls nicht unterbrochen werden. Der Maschinengang wird über einen Schütz K aktiviert.

Stellen Sie für die Zweihandverriegelung über die Schaltbelegungstabelle die Schaltfunktion auf!

Zeichnen Sie einen Funktionsplan!

Aufgabe 4.3-5: Eine SPS mit konstanter Zykluszeit besitzt eine Programmspeichergröße von 8 KByte und eine Taktzeit von 4 µs. Wie oft wird das SPS-Programm pro Sekunde durchlaufen und welche Reaktionszeit besitzt es?

Aufgabe 4.3-6: Ein Lüfter soll durch einen Taster ein- und beim nächsten Drücken des Tasters ausgeschaltet werden. Entwickeln Sie ein Steuerungsprogramm mit Hilfe der Programmiersprache FBS!



## 4.4 Speicherprogrammierbare Steuerungen - SPS

Aufgabe 4.4-1: Wischkontakte oder Kurzeinschaltglieder werden in der Steuerungstechnik dazu benötigt, aus einem Flankenwechsel eines "Dauersignals" einen Impuls zu bilden. Im nachfolgenden Zeitdiagramm wird dieser Vorgang für den positiven Flankenwechsel (0 → 1) veranschaulicht:

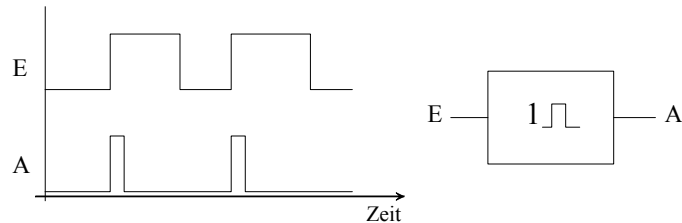

Im rechten Teil der Abbildung ist das Blocksymbol dieser Wischfunktion für das Erkennen einer aufsteigenden Flanke dargestellt.

- Stellen Sie die Wischfunktion mit Hilfe eines Programmablaufplans dar!
- Programmieren Sie für diese Wischfunktion einen Funktionsbaustein mit den SPS-Sprachen AWL und ST!

Aufgabe 4.4-2: Es liegt folgendes SPS-Programm vor:

| PB1 |      | PB2 |      |
|-----|------|-----|------|
| L   | E1.0 | UN  | A1.0 |
| UN  | M1.0 | =   | A1.0 |
| SPB | PB2  |     |      |
| U   | E1.0 |     |      |
| =   | M1.0 |     |      |

Zeichnen Sie für das vorgegebene Programm und Eingangssignal den Zeitverlauf des Ausgangszustands A1.0 in das nachfolgende Zeitdiagramm ein!

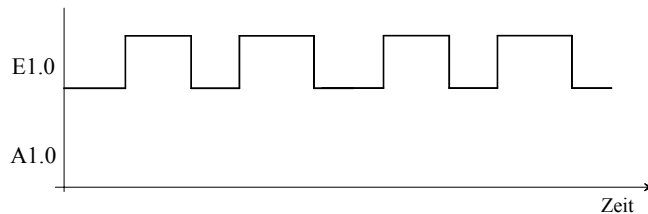

Aufgabe 4.4-3: Erstellen Sie den Ablaufplan einer Fußgängerampel!

Der Fußgänger initiiert durch einen kurzen Tastimpuls die jedermann bekannte Signalfolge Grün-Gelb-Rot-Rot/Gelb-Grün für die Fahrbahn und Rot-Grün-Rot für den Fußgängerüberweg. Übertragen Sie den Ablaufplan in die SPS-Sprache AS!
