# Supplementary material
Source: publisher site journal article supplement (https://www.degruyterbrill.com/publication/isbn/9783110411157/downloadAsset/9783110411157_Materialien.zip)
Supplement: Supplementary file 2 [file Kompendium.pdf › Kompendium.pdf]

# Vorwort

Das Lehrbuch "Steuerungs- und Regelungstechnik für Ingenieure" wendet sich an Leser technischer Fachdisziplinen, die sich das Grundlagenwissen der Steuerungs- und Regelungstechnik aneignen möchten. Obwohl dieses Fachgebiet für alle Ingenieurdisziplinen von Interesse ist, erscheint es in einer Reihe von Lehrbüchern für Maschinenbauer. Seine Zielsetzung ist aber, Leser aus allen Ingenieurdisziplinen anzusprechen.

Die Automatisierungstechnik ist seit geraumer Zeit eine sehr wichtige Ingenieursdisziplin und aus dem industriellen Umfeld nicht mehr wegzudenken. Selbst im häuslichen Bereich möchten wir ohne ihren Einfluss nicht mehr auskommen. Sie besitzt ein weites Anwendungsfeld. Die Steuerungs- und Regelungstechnik ist ein wichtiger Teil der Automatisierungstechnik.

Die Regelungstechnik basiert auf der Analyse dynamischer Systeme, weshalb im ersten Teil des Lehrbuchs ihre Analyse und Modellbildung im Mittelpunkt stehen. Dort werden die Grundlagen zur Beschreibung dynamischer Größen, repräsentiert durch Signale, und die Beschreibungsmethoden dynamischer Systeme behandelt. Sie beinhalten die klassischen Verfahren ihrer graphischen und mathematischen Darstellungsformen, weshalb sie auch völlig unabhängig von der Analyse und dem Entwurf von Regelungen und Steuerungen Anwendung finden können.

In die Grundlagen der Regelungstechnik wird im zweiten Teil eingeführt, bevor deren exakte mathematische Beschreibung mit Hilfe der Signal- und Systemtheorie vorgenommen wird.

Es wird damit verdeutlicht, dass die Regelungstechnik nicht nur das ingenieurmäßige Entwickeln neuer Systeme durch Intuition benötigt, sondern die nüchterne exakte Mathematik als Voraussetzung zur Einrichtung von Regelungen geboten ist.

Im letzten Kapitel wird in die Grundlagen der Steuerungstechnik eingeführt. Bei modernen Maschinen und Anlagen lassen sich die Regelungs- und Steuerungstechnik nicht trennen.

Die Steuerungstechnik basiert ebenfalls auf der Signal- und Systemtheorie. Ihre Ausprägung richtet sich aber nicht auf die Kontrolle gestörter Prozesse, sondern möchte umfassende Funktionsabläufe von Maschinen bzw. Anlagen gestalten. Dazu stehen Rechner vielfältiger Ausbaustufen zur Verfügung, die der modernen Steuerungstechnik dienen. Somit reiht sich die Steuerungstechnik immer mehr in die Informationstechnik ein.

In diesem Kompendium zum Lehrbuch sind in kurzer Form alle wesentlichen Begriffe und Sachverhalte zur Anwendung in der Steuerungs- und Regelungstechnik zusammengefasst. Es kann zum einen als Nachschlagewerk dienen, es ist aber auch zum anderen für Studierende zur konzentrierten Vorbereitung auf Klausuren geeignet.

# Inhaltsverzeichnis

## Vorwort

|          |                                                         |           |
|----------|---------------------------------------------------------|-----------|
| <b>1</b> | <b>Einführung .....</b>                                 | <b>1</b>  |
| <b>2</b> | <b>Signale und Systeme .....</b>                        | <b>5</b>  |
| 2.1      | Grundbegriffe der Signal- und Systemtheorie .....       | 5         |
| 2.2      | Beschreibung von Signalen .....                         | 9         |
| 2.3      | Beschreibungsmethoden für Systeme .....                 | 14        |
| <b>3</b> | <b>Regelungstechnik .....</b>                           | <b>25</b> |
| 3.1      | Grundbegriffe und Aufgaben von Regelungen .....         | 25        |
| 3.2      | Regelstrecken und Regeleinrichtungen .....              | 29        |
| 3.3      | Der Standard-Regelkreis .....                           | 37        |
| 3.4      | Stabilität von Regelkreisen .....                       | 42        |
| 3.5      | Regelkreisentwurf .....                                 | 48        |
| <b>4</b> | <b>Steuerungstechnik .....</b>                          | <b>55</b> |
| 4.1      | Grundbegriffe der Steuerungstechnik .....               | 55        |
| 4.2      | Steuerungsarten .....                                   | 56        |
| 4.3      | Methoden und Verfahren .....                            | 58        |
| 4.4      | Speicherprogrammierbare Steuerungen - SPS .....         | 64        |
| <b>5</b> | <b>Anhang .....</b>                                     | <b>77</b> |
| 5.A      | Der Dirac-Impuls $\delta(t)$ .....                      | 77        |
| 5.B      | Fourier- und Laplace-Transformation .....               | 78        |
| 5.C      | Korrespondenztabelle von Laplace-Transformationen ..... | 80        |
| 5.D      | Partialbruchzerlegung .....                             | 81        |

# 1 Einführung

Die Automatisierung stellt einen wichtigen Entwicklungsschritt in der Technik dar. Sie nimmt dem Mensch immer wiederkehrende Kontrollfunktionen ab. Durch die heutigen Möglichkeiten der Informationstechnik erschließt sich die Automatisierungstechnik immer weitere Anwendungsgebiete. Der Schritt zu "intelligenten" Geräten und Maschinen steht bevor.

## Definition: Automation

Die **Automation** ist die Technik, Überlegungen und überlegte Handlungen, die bisher vom Menschen ausgeführt wurden, von einer Maschine, dem Automaten, durchführen zu lassen.

## Ziele der Automation

1. Beherrschung von für den Menschen schwierig zu erledigenden Aufgaben.
2. Erzielung besserer Ergebnisse bei Produktionsprozessen durch Steigerung der Qualität, Einsparung von Zeit, Energie und Material und vieles mehr.
3. Erhöhung der Zuverlässigkeit durch automatisches Beseitigen von Störeinflüssen.
4. Verbesserung von Arbeits- und Lebensbedingungen durch die Ablösung geistig anspruchsloser, monotonen, anstrengender, gefährlicher oder gesundheitsschädlicher Prozesse.

## Allgemeines Automatisierungssystem:

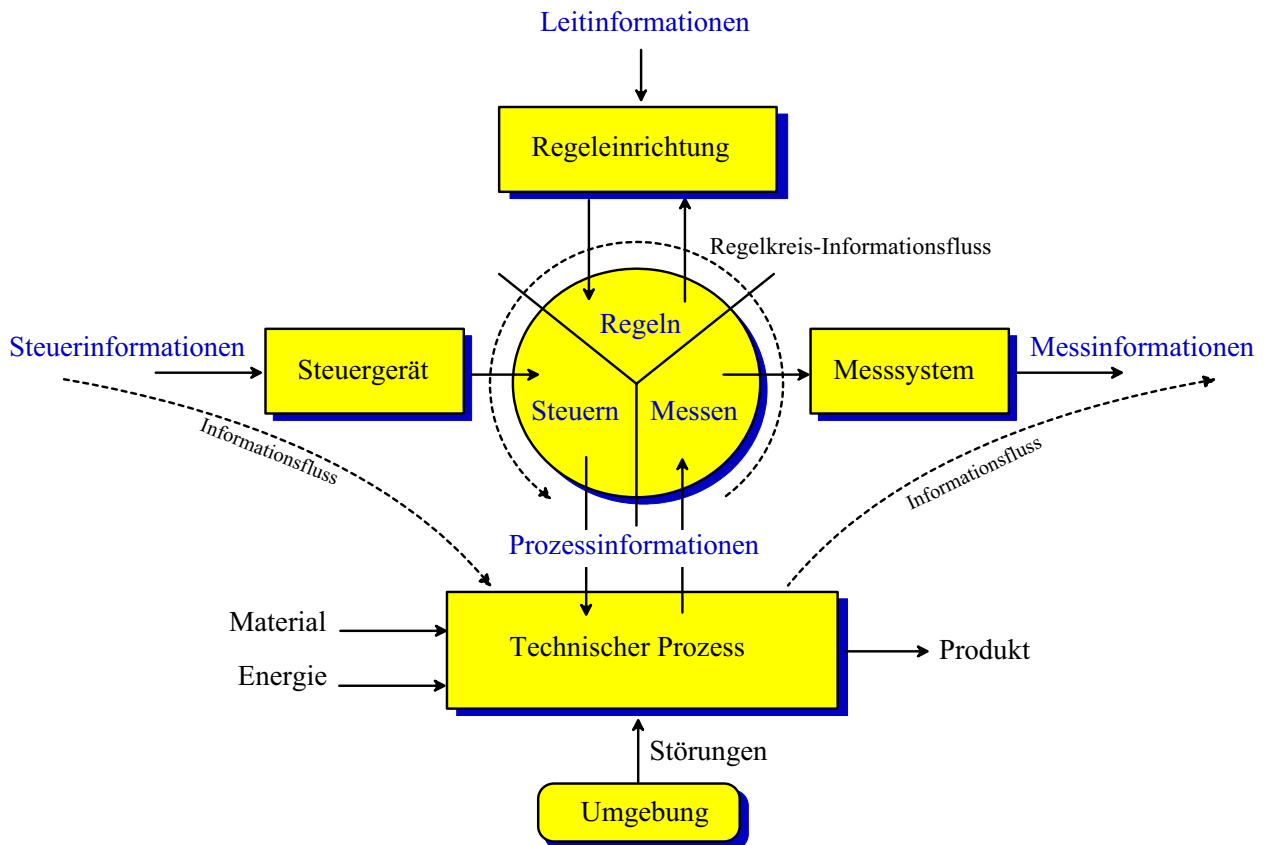

### Definition: MSR-Technik

Die Automation setzt sich i. a. aus drei Aufgabenfeldern zusammen: Messen, Steuern und Regeln. Die Automatisierungstechnik bezeichnet man deshalb auch als **MSR-Technik**.

### Messen

Die Informationen über den Zustand eines Produktionsprozesses gewinnt man mit Hilfe der Messtechnik. Die gewonnenen Informationen werden Messgrößen genannt.

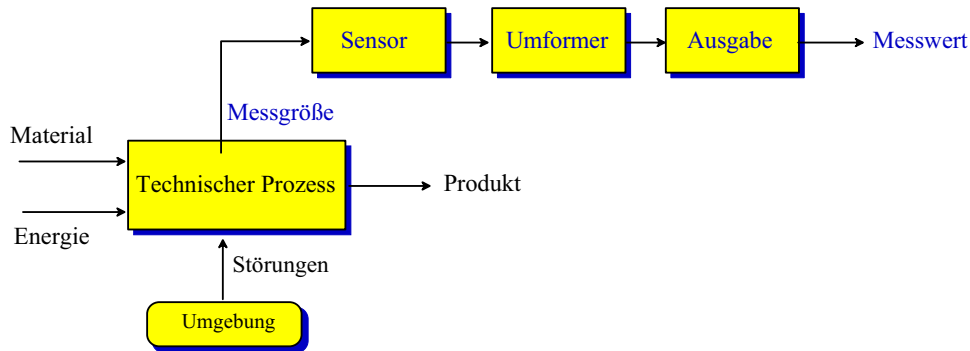

### Steuern

Die Beeinflussung von Prozessen nach Vorgabe bezeichnet man als Steuern bzw. Stellen. Bei Verwendung externer Informationen, spricht man von einem Steuerungssystem, das mit den Methoden der Steuerungstechnik konzipiert wird.

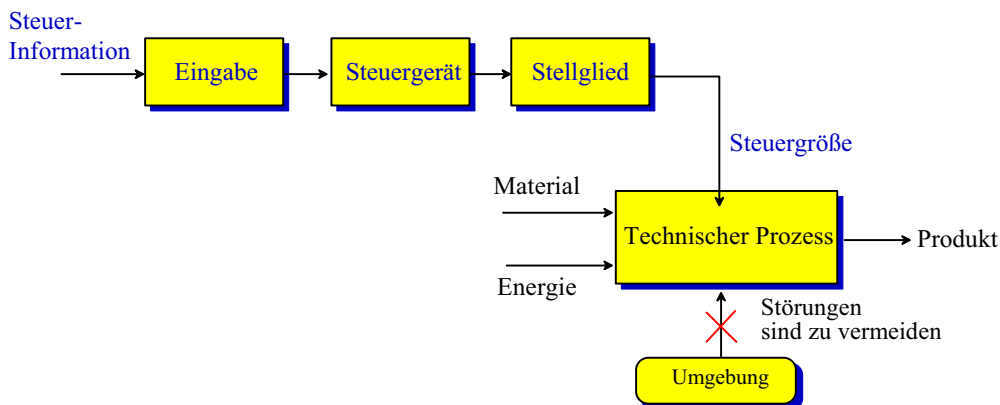

### Regeln

Der Automat erhält durch Messung Informationen aus dem Prozess, vergleicht diese Werte mit von außen vorgegebenen Leitinformationen, generiert daraus (entsprechend einer Regelvorgabe) neue Einflussgrößen auf den Prozess, die über das Stellglied weitergeleitet werden. Der Informationsfluss wird geschlossen. Man spricht aus diesem Grund vom Regelkreis.

### Regelungen basieren auf dem Rückkopplungsprinzip:

Es sagt aus, dass eine Ausgangsgröße des Prozesses, hier die Messgröße, auf eine Eingangsgröße des Systems zurückwirkt.

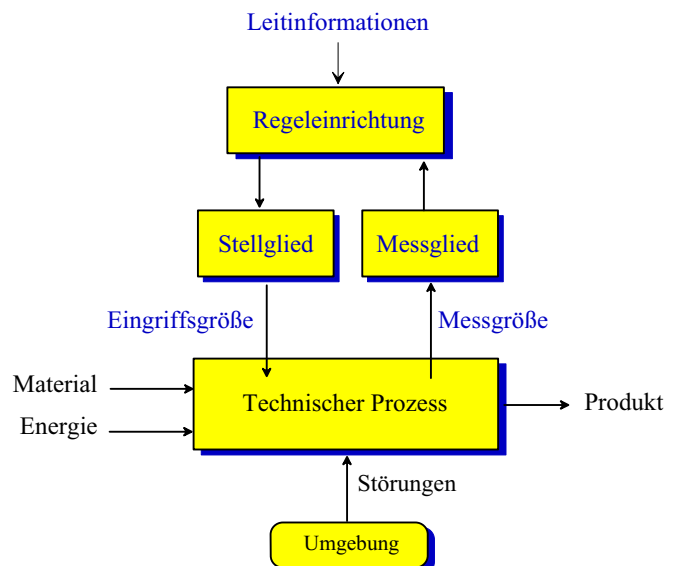

**Wirkung: Rückkopplung**

Tritt in einem rückgekoppelten System ein Ungleichgewicht auf, so fährt die Rückmeldung automatisch zu einer ausgleichenden Aktivität. Sie kann sich je nach Situation auf Vorgänge abschwächend oder verstärkend auswirken.

Die Rückkopplung stellt ein universelles Prinzip dar. Man findet es in allen Naturwissenschaften, der Medizin, der Ökonomie, im menschlichen Umgang, in der Technik und ...

Als Meilenstein in der Geschichte der Automatisierungstechnik gilt die Erfindung des Zentrifugalregulators für Dampfmaschinen von J. Watt aus dem Jahre 1788. Diese Erfindung ist Ausgangspunkt für das Maschinenzeitalter:

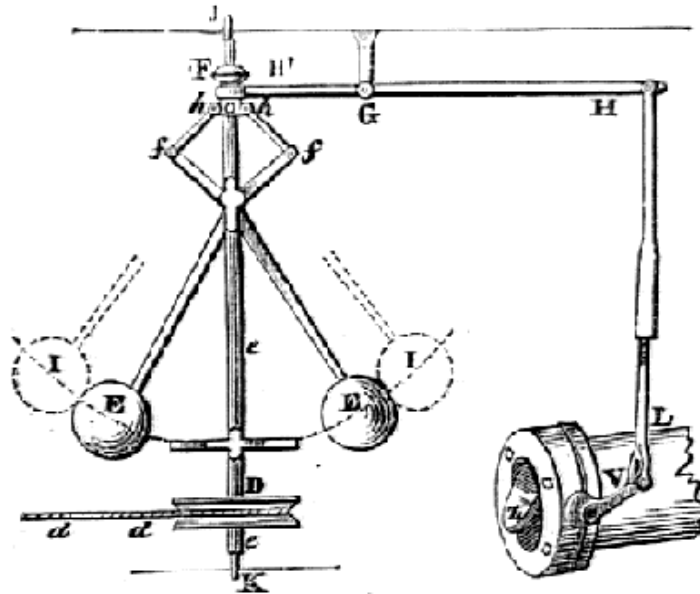



## 2 Signale und Systeme

Zur Beschreibung von Regelungen und Steuerungen verwendet man grundlegende Begriffe und Gesetzmäßigkeiten der Signal- und Systemtheorie.

### 2.1 Grundbegriffe der Signal- und Systemtheorie

Die Basisbegriffe zur Beschreibung von Systemen sind:

**Definition: System**

Ein **System** ist eine in einem betrachteten Zusammenhang gegebene Anordnung von Gebilden, die miteinander in gesetzmäßiger Beziehung stehen.

**Definition: Struktur**

Die **Struktur eines Systems** ist die Gesamtheit der wechselseitigen Beziehungen zwischen den Systemgebilden.

**Definition: Prozess**

Ein **Prozess** ist die Gesamtheit aufeinander einwirkender Vorgänge in einem System, durch den Materie, Energie und Information umgeformt, transportiert oder auch gespeichert wird.

**Definition: Größe**

**Größen** repräsentieren Eigenschaften eines Vorgangs oder Körpers, die einer qualitativen Identifizierung und einer quantitativen Bestimmung zugänglich sind.

**Definition: Eingangsgröße**

Unter **Eingangsgrößen** versteht man Größen, die auf ein System einwirken, ohne dass sie selbst vom System beeinflusst werden.

**Definition: Ausgangsgröße**

Unter **Ausgangsgrößen** werden Größen verstanden, die vom betrachteten System beeinflusst werden und es als Wirkung nach außen verlassen.

**Definition: Innere Größe bzw. Zustandsgröße**

**Zustandsgrößen** bzw. **innere Größen** sind diejenigen zeitveränderlichen Größen eines Systems, mit deren Kenntnis zu einem Zeitpunkt das weitere Systemverhalten bei gegebenen Eingangsgrößen eindeutig bestimmbar ist. Sie wirken nur im Innern eines Systems.

**Definition: Systemparameter**

Die **Systemparameter** sind Kenngrößen, deren Werte das Verhalten des Systems prinzipiell beschreiben.

**Definition: Verteilte/konzentrierte Systemparameter**

Systeme mit räumlicher Verteilung weisen **verteilte Parameter** auf. Sie werden von partiellen Differentialgleichungen mathematisch modelliert. Systeme ohne räumliche Ausdehnung besitzen dagegen **konzentrierte Parameter**. Gewöhnliche Differentialgleichungen reichen zu deren Modellierung aus.

**Definition: Signal**

Ein **Signal** stellt den zeitlichen Verlauf einer Größe dar und ist damit Träger ihrer Information (Wert einer Größe).

**Definition: Systemblock**

Der **Block** stellt ein System oder Gebilde mit einer oder mehreren verursachenden und einer/oder mehreren beeinflussten Größen dar. Er hat die Form eines Rechtecks. Innerhalb des Rechtecks soll die wirkungsmäßige Abhängigkeit zwischen Ein- und Ausgangsgrößen angegeben werden.

**Definition: Wirkung**

Eine **Wirkung** ist die Einflussnahme einer oder mehrerer Eingangsgrößen auf eine Ausgangsgröße durch den Prozess eines Systems.

**Definition: Wirkungsrichtung**

Die **Wirkungsrichtung** gibt die Richtung der Einflussnahme einer Wirkung an, nämlich von der Ursache zu ihrer Auswirkung.

**Definition: Wirkungslinie**

**Wirkungslinien** verdeutlichen Prozessgrößen bzw. Signale, die Änderungen des Beharrungszustands zwischen Systemblöcken weitergeben. Die Wirkungsrichtung wird durch einen Pfeil unmittelbar am Eintritt in einen Block bzw. eine Summationsstelle gekennzeichnet.

**Definition: Systemstruktur**

Die **Systemstruktur** ist die wirkungsmäßige Zuordnung aller Teilprozesse zu einem Gesamtsystem.

**Definition: Wirkschaltplan**

Der Wirkschaltplan (Wirkungsplan) dokumentiert die Systemstruktur. Er versinnbildlicht die wirkungsmäßigen Zusammenhänge zwischen den Größen eines technischen Systems.

**Definition: Wirkungsweg**

Unter dem **Wirkungsweg** versteht man den Weg, längs dessen die Wirkungen von Teilprozessen eines Systems verlaufen.

**Definition: Wirkungsstrecke**

Die **Wirkungsstrecke** ist ein Teil eines gesamten Wirkungswegs.

**Definition: Offener Wirkungsweg**

Es liegt ein **offener Wirkungsweg** in einem System vor, wenn von einer beeinflussten Wirkungslinie kein Wirkungsweg zurück auf eine verursachende Größe führt.

**Definition: Geschlossener Wirkungsweg**

Ein **geschlossener Wirkungsweg** in einem System hat mindestens eine Wirkungslinie zurück von einer beeinflussten Wirkungslinie zu einer verursachenden Größe.

**Definition: Wirkungsablauf**

Ein **Wirkungsablauf** kennzeichnet die Abfolge der Einflussnahme von Prozessgrößen auf einem Wirkungsweg.

**Definition: Offener Wirkungsablauf**

Ein System besitzt dann einen **offenen Wirkungsablauf**, wenn seine Systemstruktur offene Wirkungswege ausweist. Tritt ein geschlossener Wirkungsweg auf, so dürfen die beeinflussten Größen (Ausgangsgrößen) nicht fortlaufend auf die beeinflussenden Größen (Eingangsgrößen) zurück wirken.



**Definition: Geschlossener Wirkungsablauf**

Ein System besitzt dann einen **geschlossenen Wirkungsablauf**, wenn mindestens eine Wirkungslinie von einer beeinflussten zurück zu einer verursachenden Systemgröße auftritt.

**Definition: Steuerung**

Eine **Steuerung** ist ein System mit offenem Wirkungsablauf.

**Definition: Regelung**

Eine **Regelung** besteht aus einem System mit geschlossenem Wirkungsablauf.

**Eigenschaften von Steuerungen und Regelungen:**

Durch Steuerungen können nur bekannte Störeinflüsse auf Systeme eliminiert werden, während Regelungen auch nicht fassbare (gesetzmäßig beschreibbare) Umgebungseinflüsse beseitigen können.

Der Wirkungsplan eines Systems weist folgende Elemente auf:

**Symbol: Block oder Übertragungsglied**

Das **Übertragungsglied (Block)** beschreibt die wirkungsmäßige Abhängigkeit der Ausgangsgrößen  $v$  von den Eingangsgrößen  $u$ : Es wird durch einen Block symbolisiert.

**Symbol: Wirkungslinie**

Die **Wirkungslinien** repräsentieren diejenigen Größen, die dynamische Zustandsänderungen von Block zu Block weiterleiten. Sie werden durch Linien mit Benennungen und Pfeilen symbolisiert.

**Symbol: Verzweigungsstelle**

Eine **Verzweigungsstelle** verdoppelt eine Wirkungslinie. Sie wird durch einen ausgefüllten Punkt dargestellt.

**Symbol: Summationspunkt**

Die **Summation** verbindet mindestens zwei Wirkungslinien auf additive Art. Sie wird durch einen unausgefüllten Kreis symbolisiert. Die ankommenden Wirkungslinien enden mit Pfeilen im Summenpunkt und verdeutlichen durch das Vorzeichen die Art der Addition. Bei Nichtinvertierung wird in der Regel das Pluszeichen weggelassen.

**Symbol: Wirkungsumkehr**

Die **Wirkungsumkehr** negiert das ankommende Signal. Es ist vom Summationssymbol abgeleitet.

**Symbol: Multiplikationsstelle**

Die **Multiplikationsstelle** verbindet mindestens zwei Wirkungslinien und berechnet das Produkt beider Größen. Sie wird durch einen Doppelrechteck mit Multiplikationszeichen ( $\times$ ) symbolisiert.

**Symbol: Verkettung**

Die **Verkettung** verbindet die Eingangswirkungslinie  $u$  mit der Ausgangswirkungslinie  $v$  eines Blocks.

**Leitlinie zur Modellerstellung:**

- Zerlegung von Systemen in Teilsysteme, die in sich rückwirkungsfrei sind und aus Basiselementen bestehen.
- Zurückführung auf lineare Systeme.

Zum Aufbau komplexer Systeme reichen drei elementare Kopplungstypen aus:

**Kopplung: Serienschaltung**

Wenn die Übertragungsglieder hintereinander platziert sind, spricht man von einer Serienschaltung. Der Ausgang des einen Teilsystems dient als Eingang des nachfolgenden.

**Kopplung: Parallelschaltung**

Bei der Parallelkopplung teilt sich der Signalweg durch eine Verzweigungsstelle in verschiedene Übertragungsstrecken auf, um am Ende der Strecken in einem Summationspunkt oder über einen weiteren Systemblock wieder zusammengefasst zu werden.

**Kopplung: Kreisschaltung**

Eine Kreisstruktur liegt vor, wenn der Ausgang eines Übertragungsglieds auf den Eingang eines anderen wirkt und dessen Ausgang direkt oder über eine Additionsstelle auf den Eingang des ersten Blocks zurückwirkt. Ist die Rückkopplung positiv, so liegt eine Mitkopplung vor, bei negativer Rückkopplung eine Gegenkopplung.

Wirk Schaltpläne werden durch Modellbildung auf axiomatische und empirische Art gewonnen:

**Definition: Modell**

Ein **Modell** ist die Abbildung eines Systems in ein anderes begriffliches oder gegenständliches System, das den Prozess im betrachteten System bzgl. ausgewählter Fragestellungen hinreichend genau beschreibt.

**Definition: Dynamisches Modell**

**Dynamische Modelle** von Systemen beschreiben die zeitliche Entwicklung von Prozessgrößen.

**Definition: Mathematisches Modell**

Ein **mathematisches Modell** beschreibt das zeitliche Verhalten eines technischen Systems durch mathematische Beziehungen.

**Vorgehensweise: Empirische Modellgewinnung**

Beim empirischen Vorgehen ermittelt man anhand von Messungen am realen System oder Versuchsmodell mit Hilfe von Identifikationsverfahren die mathematische Modellvorstellung.

**Vorgehensweise: Axiomatische Modellgewinnung**

Der theoretische oder axiomatische Zugang der Modellbildung geschieht durch die Anwendung der bekannten mathematisch formulierten Naturgesetze.

**Arbeitsprinzipien zur Modellerstellung:**

- Aufspüren der Ein- und Ausgangsgrößen eines Systems und im Wirkungsplan eintragen.
- Bilanzgleichungen (Erhaltungsgesetze) als Summationsstelle festlegen.
- Den Wirkschaltplan beginnend von der Ausgangsgröße her entwickeln.
- Bei vorhandenen Zeitableitungen in den Bewegungsgesetzen die entsprechende Integrationskette einzeichnen, von der aus die Einzelgesetze abgezweigt werden können.
- Einzelgesetze durch Systemblöcke formulieren.

## 2.2 Beschreibung von Signalen

Nach DIN 44300 wird ein Signal als Darstellung einer Nachricht durch eine physikalische Größe erklärt.

### Festlegung: Amplitudenproportionales Signal

Für unsere Zwecke gehen wir von **amplitudenproportionalen Signalen** aus, bei welchen die Signalamplitude (Signalwert) proportional der repräsentierten Systemgröße ist.

Signale werden eingeteilt in:

### Definition: Analogsignal

Ein **analoges Signal** kann jeden beliebigen Wert seines Wertebereichs annehmen, d. h. das Signal kann in einem beliebigen Informationsintervall jeden Zwischenwert einnehmen.

### Definition: Digitalsignal

Ein **Digitalsignal** hat einen diskretisierten Informationsbereich, d. h. das Signal kann nur endlich viele Werte in einem Informationsintervall annehmen. Beschränkt sich diese Anzahl auf zwei Werte, liegt ein Binärsignal vor.

### Definition: Kontinuierliches Signal

Kann ein Signal seinen Informationswert zu jeder Zeit ändern, liegt ein **kontinuierliches Signal** vor.

### Definition: Diskontinuierliches Signal

Ein **diskontinuierliches Signal** ändert seinen Wert nur zu bestimmten Zeitpunkten.

Kombinierte Signale sind:

- Analog-kontinuierliche bzw. Analog-diskontinuierliche Signale und
- Digital-kontinuierliche bzw. Digital-diskontinuierliche Signale.

### Definition: Deterministisches Signal

Ein **deterministisches Signal** lässt sich in seinem zeitlichen Verlauf mathematisch beschreiben und ist daher exakt bestimmbar.

### Definition: Periodisches Signal

Ein **periodisches Signal** wiederholt sich in gleichbleibenden Zeitintervallen  $t_0$ :  $x(t) = x(t + k \cdot t_0)$  mit  $k=0, 1, \dots$ .

### Definition: Aperiodisches Signal

Kann über das gesamte Zeitintervall (von Beginn eines Vorgangs an bis zu seinem Ende) keine Signalwiederholung festgestellt werden, liegt ein **aperiodisches Signal** vor.

### Definition: Stochastisches Signal

Ein **stochastisches Signal** hängt in seinem zeitlichen Verlauf vom Zufall ab.

### Festlegung: Technisches Signal

Signale in technischen Anlagen sind i.a. deterministischer Art. Darunter sind periodische wie aperiodische Signale zu finden. Zusätzlich sind diese von Störsignalen stochastischer Natur überlagert. Mit entsprechenden Maßnahmen können die Signalamplituden gegenüber den Nutzsignalamplituden stark unterdrückt werden, welche wir dann als **technische Signale** bezeichnen.

### Definition: Elementarsignal

Signale, die eine besonders einfache mathematische Beschreibung gestatten und technisch leicht erzeugt werden können, nennen wir **Elementarsignale**.

Wichtige Elementarsignale für Systemuntersuchungen sind:

- a) Sprungsignal
- b) Ideales Impulssignal (Dirac)
- c) Rampensignal
- d) Harmonische Schwingung.

Zeitverschiebung von Signalen durch die Operation:  $T_{t_0} : x(t) \rightarrow T_{t_0} \{x(t)\} = x(t - t_0)$ .

Ein beliebiges Signal kann mit Dirac-Impulsen aufgebaut werden:

$$x(t) = \lim_{\Delta t \rightarrow 0} \sum_i x(t_i) \cdot \Delta_{\Delta t}(t - t_i) = \int_{-\infty}^{\infty} x(t') \cdot \delta(t - t') dt'.$$

**Signaldarstellung in der Gauß'schen Zahlenebene durch rotierende Vektoren.**

Beispiel: Cosinus-Signal

$$x(t) = x_0 \cdot \cos(\omega_0 \cdot t) \xrightarrow[\text{Ebene}]{\text{Komplexe}} x(t) = \frac{1}{2} x_0 (e^{j\omega_0 t} + e^{-j\omega_0 t})$$

$$= \sum_{n=-1}^1 C_n e^{j \cdot n \cdot \omega_0 \cdot t} \quad \text{mit : } C_0 = 0 \text{ und } C_{\pm 1} = \frac{1}{2} x_0.$$

### Definition: Frequenzebene

Jedes in der realen Welt mögliche Signal kann durch eine Fourier-Transformation in eine Summe von Sinussignalen unterschiedlicher Frequenz zerlegt werden. Sie werden in der **Frequenzebene** beschrieben.

### Definition: Spektrum

Die Darstellung der zum Aufbau eines Signals notwendigen harmonischen Signale über der Frequenz nennt man **Frequenzdarstellung** bzw. **Spektrum**. Die einzelnen Linien bezeichnet man als Spektralkomponenten eines Signals.

### Spektrum: Periodische Signale

Aus den komplexen Fourier-Koeffizienten

$$C_n = \frac{1}{T_0} \int_{-\frac{T_0}{2}}^{\frac{T_0}{2}} x(t) \cdot e^{-j \cdot n \cdot \omega_0 \cdot t} dt$$

lässt sich das Amplituden- Phasenspektrum bestimmen:

$$\text{Amplitudenspektrum:} \quad |C_n| = \sqrt{(\operatorname{Re} C_n)^2 + (\operatorname{Im} C_n)^2},$$

$$\text{Phasenspektrum:} \quad \varphi_n = \arctan\left(\frac{\operatorname{Im} C_n}{\operatorname{Re} C_n}\right).$$

### Spektrum: Aperiodische Signale

Die Fourier-Transformierte eines Signals  $x(t)$ , gegeben durch

$$X(j\omega) \equiv \text{FT}\{x(t)\} = \int_{-\infty}^{\infty} x(t) \cdot e^{-j\omega t} dt,$$

legt das Amplituden- und Phasenspektrum eines aperiodischen Signals über dessen Polardarstellung

$$X(j\omega) = |X(j\omega)| \cdot e^{j\varphi(\omega)}$$

fest:

$$|X(j\omega)| = \sqrt{R(\omega)^2 + I(\omega)^2} \quad (\text{Amplitudenspektrum})$$

$$\varphi(\omega) = \arctan\left(\frac{I(\omega)}{R(\omega)}\right) \quad (\text{Phasenspektrum}).$$

**Definition: Korrespondenz zwischen Signalbereichen**

Zwischen den Signaldarstellungen im Zeit- und Frequenzbereich besteht eine eindeutige **Korrespondenz**. Diese wird, wo möglich, durch die Schreibweise mit Klein- und Großbuchstaben ausgedrückt:

$$x(t) \longleftrightarrow X(j\omega).$$

**Feststellung:**

**Periodische Signale besitzen diskrete Spektren.**  
**Aperiodische Signale weisen kontinuierliche Spektren auf.**

**Darstellung: Spektraldiagramme**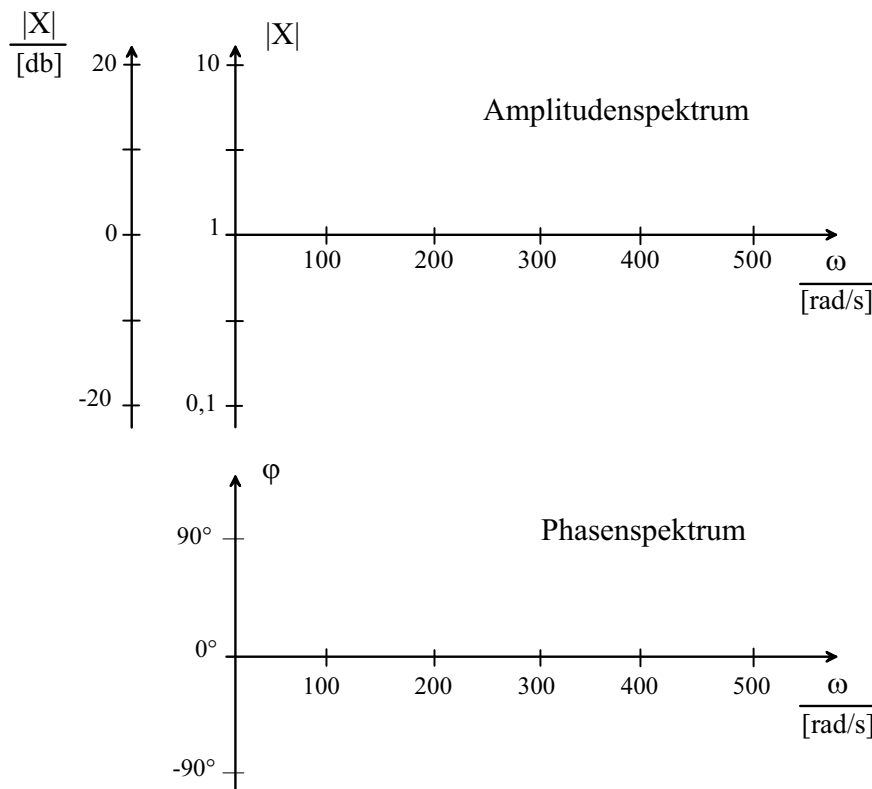**Definition: Dezibel**

Das **Dezibel** wird durch das logarithmierte Leistungs- oder Amplitudenverhältnis zweier Signale durch die Vorschriften

$$S_p = 10 \cdot \text{Log}(\text{Leistungsverhältnis}) \quad [\text{db}]$$

$$\text{oder: } S_A = 20 \cdot \text{Log}(\text{Amplitudenverhältnis}) \quad [\text{db}]$$

berechnet. Im Fall des Amplitudenspektrums wird als Amplitudenbezug der Wert 1 eingesetzt, so dass für das Dezibel gilt:

$$|X(j\omega)| = 20 \cdot \text{Log}(|X(j\omega)|) \quad [\text{db}].$$

**Eigenschaften von Spektren:**

1. Die Spektren vermitteln durch ihre kompakte Form eine globale Übersicht über den frequenzmäßigen Aufbau eines Signals.
2. Die imaginäre Größe  $j\omega$  lässt sich als physikalische Kreisfrequenz interpretieren. Der Ingenieur kann mit Hilfe der Spektren Rückschlüsse auf das Verhalten seines Untersuchungsobjekts ziehen.
3. Die Berechnung der Spektren stellt sich i. a. mathematisch als sehr aufwendig heraus. Der Frequenzbereich verkörpert deshalb ein nicht ganz einfaches Werkzeug zur Signaldarstellung.

4. Es gibt Signale mit und ohne Unendlichkeitsstellen in ihren Amplitudenspektren. Sie lassen auf keine besondere physikalische Interpretation schließen. Aus ihnen kann nur vage gefolgert werden, dass evtl. abklingende Signale keine Unendlichkeitsstellen aufweisen.

#### Definition: Polstelle

**Polstellen** von Signalen liegen dann vor, wenn ihre Amplitudendichte im Frequenzbereich unendlich hohe Werte annimmt. Sie werden durch die Nullstellen ihrer Nennerfunktionen festgelegt.

#### Definition: Nullstelle

**Nullstellen** von Signalen bzw. ihren Funktionen werden im Frequenzbereich durch die Nullstellen der Zählerfunktion ihrer Signalfunktionen definiert.

#### Definition: Komplexe Frequenz

**Komplexe Frequenzen** werden durch die Variable  $s \equiv \sigma + j \cdot \omega$  definiert.

#### Interpretation: Komplexe Frequenz

Der reelle Parameter  $\sigma$  beschreibt das zeitliche Abklingen bzw. Anwachsen von Signalen, während der Imaginärteil  $j\omega$  die Kreisfrequenz der Signalschwingung abbildet.

#### Definition: Bildbereich

Die Ebene der komplexen Frequenzen  $s$  wird als **Bildbereich** bezeichnet.

Die Einführung der komplexen Frequenz  $s$  erlaubt die Feststellung:

**Alle Signale besitzen Pol- bzw. Unendlichkeitsstellen im Bildbereich.**

#### Definition: Pol-Nullstellen-Schema (PN-Schema)

Das **Pol-Nullstellen-Schema** beschreibt die Lagen der Pol- und Nullstellen von Signalen im Bildbereich. Pole werden im Pol-Nullstellen-Schema mit Kreuzen, Nullstellen mit Kreisen gekennzeichnet.

**Aus dem PN-Schema kann auf den Zeitverlauf eines Signals geschlossen werden.**

Für die Pole gilt:

1. Polstellen treten bei vorhandenem  $j\omega$ -Anteil immer paarweise auf.
2. Polstellen mit negativem  $\sigma$ -Anteil beschreiben abklingende (gedämpfte) Signale.
3. Polstellen mit positivem  $\sigma$ -Anteil zeigen exponentiell anwachsende Signale an.
4. Pole auf der Frequenzachse ( $\sigma = 0$ ) verkörpern zeitlich amplitudenkonstante Signale.

**Aus den Lagen der Polstellen im PN-Schema kann auf die Stabilität (Beschränktheit) von Signalen (und Systemen) geschlossen werden.**

#### Definition: Laplace-Transformation

Ist  $x(t)$  ein Signal mit der Eigenschaft  $x(t) = 0$  für  $t < 0$ , so lautet die einseitige **Laplace-Transformierte** dieses Signals:

$$X(s) \equiv \text{LT}\{x(t)\} = \int_{0-}^{\infty} x(t) \cdot e^{-s \cdot t} dt.$$

Die Variable  $s$  stellt den Laplace-Operator  $s \equiv \sigma + j\omega$  (Komplexe Frequenz) dar. Allgemein spricht man von der Laplace-Transformation der Funktion  $x(t)$ .

**Korrespondenztabelle von Laplace-Transformierten:**

| Nr. | Zeitfunktion $x(t)$<br>(Originalfunktion)                                                                                          | Laplace-Transformierte $X(s)$<br>(Bildfunktion)       |
|-----|------------------------------------------------------------------------------------------------------------------------------------|-------------------------------------------------------|
| 1   | Nadel-Impuls: $\delta(t)$                                                                                                          | 1                                                     |
| 2   | Verschobener Nadelimpuls: $\delta(t-T)$                                                                                            | $e^{-T \cdot s}$                                      |
| 3   | Sprungsignal: $\varepsilon(t)$                                                                                                     | $\frac{1}{s}$                                         |
| 4   | Rampensignal: $\rho(t) = \varepsilon(t) \cdot t$                                                                                   | $\frac{1}{s^2}$                                       |
| 5   | $\varepsilon(t) \cdot \frac{t^n}{n!} \quad n = 0, 1, 2, \dots$                                                                     | $\frac{1}{s^{n+1}}$                                   |
| 6   | Rechteckimpuls: $\varepsilon(t) - \varepsilon(t-T)$                                                                                | $\frac{1 - e^{-T \cdot s}}{s}$                        |
| 7   | $\varepsilon(t) \cdot e^{-\alpha \cdot t}$                                                                                         | $\frac{1}{s + \alpha}$                                |
| 8   | $\varepsilon(t) \cdot \frac{t^n}{n!} \cdot e^{-\alpha \cdot t} \quad n = 0, 1, 2, \dots$                                           | $\frac{1}{(s + \alpha)^{n+1}}$                        |
| 9   | $\varepsilon(t) \cdot (1 - e^{-\alpha \cdot t})$                                                                                   | $\frac{\alpha}{s(s + \alpha)}$                        |
| 10  | $\varepsilon(t) \cdot \sin(\omega_0 t)$                                                                                            | $\frac{\omega_0}{s^2 + \omega_0^2}$                   |
| 11  | $\varepsilon(t) \cdot \cos(\omega_0 t)$                                                                                            | $\frac{s}{s^2 + \omega_0^2}$                          |
| 12  | $\varepsilon(t) \cdot (1 - (1 + \alpha \cdot t) e^{-\alpha \cdot t})$                                                              | $\frac{\alpha^2}{s(s + \alpha)^2}$                    |
| 13  | $\varepsilon(t) \cdot \left( 1 + \frac{\beta \cdot e^{-\alpha \cdot t} - \alpha \cdot e^{-\beta \cdot t}}{\alpha - \beta} \right)$ | $\frac{\alpha \cdot \beta}{s(s + \alpha)(s + \beta)}$ |
| 14  | $\varepsilon(t) \cdot (e^{-\alpha \cdot t} \sin(\omega_0 t))$                                                                      | $\frac{\omega_0}{(s + \alpha)^2 + \omega_0^2}$        |
| 15  | $\varepsilon(t) \cdot (e^{-\alpha \cdot t} \cos(\omega_0 t))$                                                                      | $\frac{s + \alpha}{(s + \alpha)^2 + \omega_0^2}$      |
| 16  | $\varepsilon(t) \cdot t \cdot \sin(\omega_0 t)$                                                                                    | $\frac{2s \cdot \omega_0}{(s^2 + \omega_0^2)^2}$      |
| 17  | $\varepsilon(t) \cdot t \cdot \cos(\omega_0 t)$                                                                                    | $\frac{s^2 - \omega_0^2}{(s^2 + \omega_0^2)^2}$       |

**Korrespondenzen:**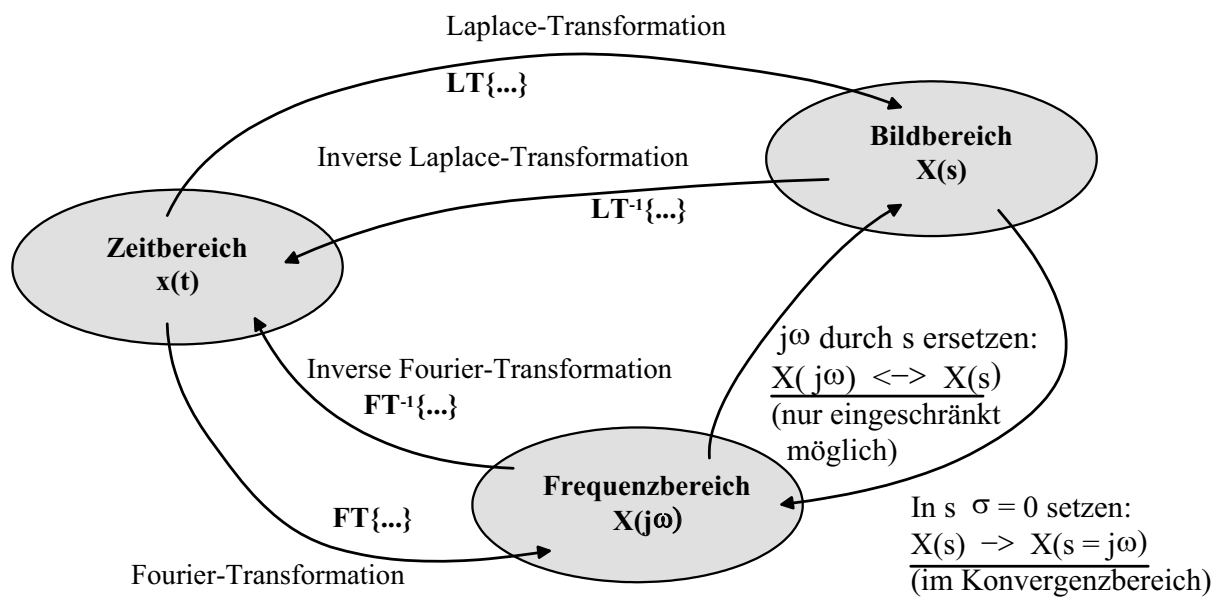

Die Laplace-Transformierten von Signalen besitzen i. a. die Form einer gebrochen rationalen Funktion:

$$X(s) = \left( \sum_{i=0}^n a_i \cdot s^i \right) / \left( \sum_{i=0}^m b_i \cdot s^i \right).$$

Die Zähler- und Nennerpolynome besitzen entsprechend ihrer Ordnung  $n$  bzw.  $m$  Lösungen. Sie legen die Pol- bzw. Nullstellen der Signale für das PN-Schema fest.

## 2.3 Beschreibungsmethoden für Systeme

Die Basisbegriffe zur Beschreibung von Systemen sind:

### Definition: System

Ein **System** ist eine Menge miteinander in gesetzmäßiger Beziehung stehender Gebilde mit ihren Größen.

### Definition: Deterministisches System

Ein **deterministisches System** erlaubt eine exakte Beschreibung der Ausgangsgrößen in Abhängigkeit der Eingangsgrößen.

### Definition: Stochastisches System

**Stochastische Systeme** besitzen statistische Eigenschaften; dadurch werden deren Ausgangsgrößen nur mit einer bestimmten Wahrscheinlichkeit berechenbar.

### Definition: Analoges System

Die Systemgrößen **analoger Systeme** können innerhalb gewisser Grenzen jeden beliebigen Wert annehmen. Man bezeichnet sie auch als kontinuierliche Systeme

### Definition: Digitales System

**Digitale Systeme** besitzen quantisierte Systemgrößen. Können Systemgrößen nur zwei Werte annehmen, spricht man von Binärsystemen.



Als schwierige Aufgabe der Automatisierungstechnik gilt die Aufstellung von Systemmodellen (mathematische Modelle) für die technischen Systeme. Für deren Entwicklung gilt:

So einfach wie möglich, so detailgetreu wie erforderlich!

### Definition: Systemanalyse

Die Modellbildung dynamischer Systeme gründet sich zuerst auf eine gründliche **Systemanalyse** experimenteller oder theoretischer Art. Für das axiomatische Vorgehen benötigt man die Grundprinzipien der Erhaltung von Energie, Masse, Impuls, Kraft und weiterer physikalischer Größen zusammen mit den Gesetzmäßigkeiten der Systembauteile. Der experimentelle Weg untersucht ein System auf messtechnischem Weg und formuliert aus den Ein-/Ausgangsbeziehungen die entsprechenden Modellgleichungen.

### Definition: Systementwurf

Die Aufgabe des **Systementwurfs** geht von der Systemanalyse aus und dient dazu, eine Auswahl und Anordnung von Systemkomponenten zu finden, um ein gewünschtes Gesamtsystem-Verhalten zu erzielen.

### Systemeigenschaften

#### Definition: Statisches Verhalten

Das **statische Verhalten** eines Systems beschreibt den zeitunabhängigen Zusammenhang zwischen seinen Ein- und Ausgangsgrößen. Es wird graphisch als Kennlinie dargestellt.

#### Definition: Dynamisches Verhalten

Das **dynamische Verhalten** eines Systems gibt den zeitlichen Verlauf der Ausgangsgrößen als Reaktion auf Veränderungen der Eingangsgrößen an. Es dauert so lange, bis die Ausgangsgrößen einen neuen stationären Zustand einnehmen (keine zeitliche Änderung der Signalkennwerte mehr auftritt), vorausgesetzt, die Eingangsgrößen ändern sich nicht mehr.

#### Definition: Ausgleichs- bzw. Einschwingverhalten

Das dynamische Übergangsverhalten eines Systems wird auch als Ausgleichsverhalten bzw. **Einschwingverhalten** bezeichnet.

#### Definition: Beharrungsverhalten

Das statische Verhalten tritt nach dem Ausgleichsverhalten (für  $t \rightarrow \infty$ ) ein und wird auch **Beharrungsverhalten** genannt.

#### Definition: Lineares System

Ein System besitzt ein **lineares Übertragungsverhalten**, wenn es additiv und homogen auf Eingangssignale reagiert. Mathematisch kommen beide Eigenschaften durch die Beziehung

$$T \left\{ \sum_{i=1}^n k_i \cdot u_i(t) \right\} = \sum_{i=1}^n k_i \cdot T \{ u_i(t) \} = \sum_{i=1}^n k_i \cdot v_i(t)$$

zum Ausdruck.

#### Definition: Kausales System

Die **Kausalität eines Systems** besagt, dass die Reaktion  $v(t)$  des Systems erst eintreffen kann, wenn die Ursache  $u(t)$  vorhanden war. Mathematisch bedeutet dies:

$$\text{Aus } u(t) = 0 \text{ für } t < t_0 \text{ folgt } v(t) = T \{ u(t) \} = 0 \text{ für } t < t_0.$$

#### Definition: Zeitinvariantes System

Ein System verhält sich **zeitinvariant**, wenn ein zeitverschobenes Eingangssignal  $u(t - t_0)$  das zeitverschobene Ausgangssignal  $v(t - t_0)$  erzeugt. Der Zeitpunkt  $t_0$  stellt eine beliebige Zeitverschiebung,  $u(t)$  ein beliebiges Eingangssignal und  $v(t)$  das dazugehörige Ausgangssignal dar:

$$T \{ u(t - t_0) \} = v(t - t_0)$$

**Definition: E/A-Stabilität eines Systems**

Ein System gilt als stabil, wenn jede beschränkte Eingangsgröße  $u(t)$  zu einer beschränkten Ausgangsgröße  $v(t)$  führt, also gilt:

$$\text{Für alle Zeiten } t \text{ gilt: } |u(t)| < S_1 < \infty \Rightarrow |v(t)| < S_2 < \infty.$$

Diese Stabilitätsdefinition bezeichnet man auch als **E/A-Stabilität** (Ein-Ausgangsstabilität) oder BIBO-Stabilität (BIBO = Bounded Input Bounded Output).

**Definition: Zustandsstabilität eines Systems (Ljapunow-Stabilität)**

Ein System ist **asymptotisch stabil**, wenn es in seiner Ruhelage bleibt, solange es nicht von außen angeregt wird und in seine Ruhelage zurückkehrt, wenn alle äußeren Wirkungen von ihm weggenommen werden.

Beide Definitionen sind zueinander äquivalent, denn es kann gezeigt werden:

Ist ein System Ljapunow-stabil, so ist es auch E/A-stabil.

**Systembeschreibung**

Die physikalischen und technischen Gesetze der Natur werden in aller Regel durch Differentialgleichungen beschrieben. Ein System mit einem Eingangssignal  $u(t)$  und einem Ausgangssignal  $v(t)$  (d. h.  $n = 1$  und  $m = 1$ ) beschreibt die für uns wichtige lineare Systemgleichung:

$$a_p \cdot v^{(p)}(t) + a_{p-1} \cdot v^{(p-1)}(t) + \dots + a_1 \cdot \dot{v}(t) + a_0 \cdot v(t) = b_0 \cdot u(t) + b_1 \cdot \dot{u}(t) + \dots + b_{q-1} \cdot u^{(q-1)}(t) + b_q \cdot u^{(q)}(t).$$

Da für die Untersuchung linearer Systeme eine in sich geschlossene Theorie zur Verfügung steht, versucht man die Menge der nichtlinearen Systeme auf lineare zurückzuführen.

**Linearisierung des statischen Verhaltens:**

$$v = f(u) \quad \rightarrow \quad v = f(u_0) + \left. \frac{df}{du} \right|_{u=u_0} (u - u_0) + \cancel{\frac{1}{2!} \left. \frac{d^2 f}{du^2} \right|_{u=u_0} (u - u_0)^2 + \dots}$$

**Linearisierung des dynamischen Verhaltens:**

$$\begin{aligned} & \text{DGL} \{ u^{(i)} \ i = 1, \dots, q; v^{(j)} \ j = 0, \dots, p; t \} = 0 \\ & \quad \downarrow \\ & \text{DGL}(\dots) \Big|_{AP} + \frac{\partial \text{DGL}(\dots)}{\partial \Delta u} \Big|_{AP} \cdot \Delta u + \frac{\partial \text{DGL}(\dots)}{\partial \dot{\Delta u}} \Big|_{AP} \cdot \dot{\Delta u} + \frac{\partial \text{DGL}(\dots)}{\partial \ddot{\Delta u}} \Big|_{AP} \cdot \ddot{\Delta u} + \dots \\ & \quad + \frac{\partial \text{DGL}(\dots)}{\partial \Delta v} \Big|_{AP} \cdot \Delta v + \frac{\partial \text{DGL}(\dots)}{\partial \dot{\Delta v}} \Big|_{AP} \cdot \dot{\Delta v} + \frac{\partial \text{DGL}(\dots)}{\partial \ddot{\Delta v}} \Big|_{AP} \cdot \ddot{\Delta v} + \dots \\ & \quad \cancel{+ \text{Terme höherer Ordnung}} = 0 \end{aligned}$$

**Definition: P-Verhalten**

Bei Systemen mit **proportionalem Verhalten** ist der Wert des Ausgangssignals im Beharrungszustand proportional zum Eingangssignal. Den Zeitgrenzwert des Quotienten aus Aus- und Eingangsgröße bezeichnet man als Proportionalbeiwert  $K_p$ . Er ist gegeben durch:

$$K_p = \lim_{t \rightarrow \infty} \frac{y(t)}{x(t)}.$$

**Definition: P-System**

Das elementarste System mit P-Verhalten wird durch die Systemgleichung

$$v(t) = K_p \cdot u(t).$$

gegeben. Es wird als **P-System** bezeichnet. Bei ihm wird das Eingangssignal zeitlich unverfälscht an den Systemausgang weitergegeben.

**Definition: I-Verhalten**

Bei Systemen mit integrierendem Verhalten verhält sich das Ausgangssignal proportional zum Zeitintegral des Eingangssignals:

$$v(t) = K_I \int_0^t u(\tau) d\tau \quad \text{oder} \quad \dot{v}(t) = K_I \cdot u(t).$$

Diese Definitionsgleichung stellt die **Integralform** der Systemgleichung dar, was einer anderen Form einer Differentialgleichung entspricht. Ihre Umformung in die bekannte **Differentialform** gewinnt man durch eine Zeitableitung:

$$\dot{v}(t) = K_I \cdot u(t).$$

Die Proportionalitätskonstante wird als Integrierbeiwert  $K_I$  bezeichnet.

**Definition: D-Verhalten**

Bei Systemen mit **differenzierendem Verhalten** ist das Ausgangssignal proportional der zeitlichen Ableitung seines Eingangssignals:

$$v(t) = K_D \cdot \frac{d}{dt} u(t).$$

Den Proportionalitätsfaktor bezeichnet man als Differenzierbeiwert  $K_D$ .

**Definition: Totzeit-Verhalten**

Bei **Totzeit-Verhalten** eines Systems tritt der zeitliche Verlauf der Eingangsgröße um die Totzeit  $T_t$  verspätet am Ausgang auf:

$$v(t) = K_p \cdot u(t - T_t).$$

**Definition: Verzögertes Verhalten n. Ordnung**

Ein **verzögertes Zeitverhalten** erster Ordnung besitzen Systeme mit den Differentialgleichungen:

$$T_1 \cdot \dot{v}(t) + v(t) = \begin{cases} K_p \cdot u(t) & \text{P-T}_1 \text{ System} \\ K_I \int_0^t u(t') dt' & \text{I-T}_1 \text{ System} \\ K_D \cdot \dot{u}(t) & \text{D-T}_1 \text{ System.} \end{cases}$$

Das  $T_2$ -Verhalten (Verzögerung 2. Ordnung) besitzt in der Fachliteratur eine bestimmte Darstellungsform:

$$T_0^2 \cdot \ddot{v}(t) + 2 \cdot D \cdot T_0 \cdot \dot{v}(t) + v(t) = \begin{cases} K_p \cdot u(t) & \text{P-T}_2 \text{ System} \\ K_I \int_0^t u(t') dt' & \text{I-T}_2 \text{ System} \\ K_D \cdot \dot{u}(t) & \text{D-T}_2 \text{ System.} \end{cases}$$

**Allgemeine Namensgebung für Systeme:**

**Systemname  $\equiv$  Eingangsverhalten - Ausgangsverzögerung – Sonderverhalten.**

Der Systemname beginnt mit der Beschreibung des Systemverhaltens bzgl. der Eingangssignalwirkung, also P, I, D, PI, PD, PID. Treten in der Systemgleichung eingeangseitig Verzögerungen höherer Ordnungen auf, werden diese durch Indexierung der Namen mit der maximalen Ordnungszahl gekennzeichnet.

Nach dem Eingangsverhalten wird, durch einen Bindestrich eventuell getrennt, das Verzögerungsverhalten mit Angabe der Ordnung als  $T_n$  notiert.

Ein vorliegendes Sonderverhalten schließt den Systemnamen ab. Hier kann z. B. ein zusätzlich auftretendes Totzeit-Verhalten angegeben werden.

Wichtig bei der Ermittlung der Systemnamen ist die Aufstellung der sogenannten MSR-Form der Systemgleichung:

**Definition: MSR-Form der Systemgleichung**

Die **MSR-Form** der Systemgleichung liegt dann vor, wenn die Ausgangsgröße  $v(t)$  in der Differentialgleichung vorkommt und den Vorfaktor 1 ausweist:

$$\dots + a_1 \cdot \dot{v}(t) + \underline{1 \cdot v(t)} = b_0 \cdot u(t) + \dots$$

Der alternative Weg der Systembeschreibung stellt das Experiment dar!

**Definition: Antwortsignal**

Die Ausgangssignale auf eingangsseitig mit Testsignalen erregte Systeme bezeichnet man als **Antwortsignale**.

Die Antwortsignale der wichtigen Testsignale sind:

**Definition: Sprungantwort**

Die **Sprungantwort** eines Systems ist der zeitliche Verlauf seines Ausgangssignals als Reaktion auf eine Sprungfunktion  $u(t) = u_0 \cdot \varepsilon(t)$  am Eingang.

**Definition: Übergangsfunktion**

Wird der Signalverlauf des Ausgangssignals durch Normierung auf die Sprunghöhe  $u_0$  des Eingangssignals bezogen, dann spricht man von der **Übergangsfunktion  $h(t)$** .

**Definition: Impulsantwort**

Die **Impulsantwort** ist der zeitliche Verlauf des Ausgangssignals als Reaktion auf ein am Eingang angelegtes Impulssignal der Form  $u(t) = u_0 \cdot \Delta(t)$ , mit  $\Delta(t) = (\varepsilon(t) - \varepsilon(t - t_0))$ .

**Definition: Gewichtsfunktion**

Die **Gewichtsfunktion  $g(t)$**  entsteht durch Normierung der Impulsantwort mit Hilfe der Zeitfläche des Eingangssignals  $A = \int_{-\infty}^{\infty} u(t) dt$ .

**Definition: Rampenantwort bzw. Bezogene Rampenantwort**

Die **Rampenantwort** ist der zeitliche Verlauf des Ausgangssignals auf ein Rampensignal der Anstiegsgeschwindigkeit  $u_0$  am Systemeingang.

Die **bezogene Anstiegantwort  $\gamma(t)$**  entsteht durch Normierung auf die Anstiegsgeschwindigkeit  $u_0$  des Eingangssignals.

**Berechnung: Beliebige Signale**

Das Ausgangssignal berechnet sich als Integral des Produkts zeitverschobener (gefalteter) Gewichtsfunktionen mit dem Eingangssignal. Man bezeichnet diese Integralmultiplikation als Faltungsoperation und kürzt sie mit einem \* (Stern) ab:

$$v(t) = g(t) * u(t) = \int_{-\infty}^{\infty} g(t - t') \cdot u(t') dt' = \int_{-\infty}^{\infty} g(t') \cdot u(t - t') dt'$$

Es kann dazu festgestellt werden:

Die Reaktion von Systemen auf beliebige Eingangssignale lässt sich mit Hilfe von Antwortfunktionen berechnen. Deshalb beschreiben sie Systeme vollständig. Der Gewichtsfunktion kommt dabei eine herausragende Bedeutung zu.

### Beschreibung von Signalen im Frequenzbereich

Physikalisch beschreibt die Frequenzkennlinie, wie ein dynamisches System eine sinusförmige Eingangsgröße überträgt, wobei nur sein stationäres Verhalten berücksichtigt wird.

### Definition: Frequenzgang

Der **Frequenzgang  $FG(j\omega)$**  eines Systems bestimmt sich aus dem Quotienten der Fourier-Transformierten seiner Ein- und Ausgangssignale:

$$FG(j\omega) \equiv \frac{FT\{v(t)\}}{FT\{u(t)\}} = \frac{V(j\omega)}{U(j\omega)}.$$

Die Fourier-Transformierten der Ein- und Ausgangssignale sind mit  $U(j\omega)$  und  $V(j\omega)$  abgekürzt.

Der Frequenzgang  $FG(j\omega)$  korrespondiert mit der Gewichtsfunktion  $g(t)$  über die Fourier-Transformation:

$$g(t) \rightarrow G(j\omega)$$

### Darstellungsformen des Frequenzgangs $FG(j\omega)$ :

Kartesische Darstellung:  $FG(j\omega) = FG_R(\omega) + j \cdot FG_I(\omega)$

Polare Darstellung:  $FG(j\omega) = |FG(j\omega)| e^{j\varphi_G(\omega)} \equiv AG(\omega) \cdot e^{j\varphi_G(\omega)}.$

### Definition: Ortskurve, Nyquist-Diagramm

Wird der Frequenzgang  $FG(j\omega)$  als Kurve in der komplexen Ebene in Abhängigkeit des Frequenzparameters  $\omega$  dargestellt, spricht man von der **Ortskurve** oder dem **Nyquist-Diagramm** eines Systems:

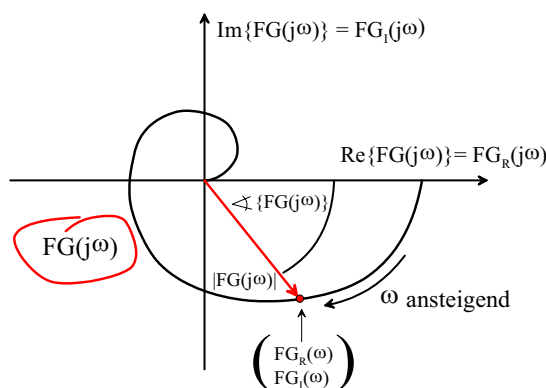

### Definition: Amplitudengang

Der **Amplitudengang  $AG(\omega)$**  eines Systems beschreibt das Verhältnis der Signalamplituden von Eingangs- und Ausgangsgrößen als Funktion der Frequenz:

$$AG(\omega) = |FG(j\omega)|.$$

Er veranschaulicht, welche Frequenzen die Ausgangssignale maßgebend beeinflussen bzw. welche Frequenzanteile beim Durchgang eines Signals durch das System unterdrückt werden.

**Definition: Phasengang**

Der **Phasengang**  $\varphi G(\omega)$  eines Systems zeigt die Phasenverschiebungen der Frequenzkomponenten im Ausgangssignal an, die sie auf dem Weg durch das Übertragungsglied in Bezug zu den Frequenzkomponenten des Eingangssignals erfahren:

$$\varphi G(\omega) = \angle \{FG(j\omega)\}.$$

**Definition: Bode-Diagramm**

Das **Bode-Diagramm** stellt den Frequenzgang als Amplituden- und Phasengang in zwei getrennten Diagrammen der Frequenz dar. Die Frequenzachse ist dabei logarithmisch skaliert, ebenso die Amplituden-Ordinate. Die Phase wird linear in Winkelgrad  $[\circ]$  eingeteilt.

**Berechnung: Frequenzgang  $F(j\omega)$  linearer Systeme**

$$\begin{aligned} FG(j\omega) &= \frac{FT\{v(t)\}}{FT\{u(t)\}} = \frac{b_0 \cdot (j\omega)^0 + b_1 \cdot (j\omega)^1 + \dots + b_{q-1} \cdot (j\omega)^{q-1} + b_q \cdot (j\omega)^q}{a_0 \cdot (j\omega)^0 + a_1 \cdot (j\omega)^1 + \dots + a_{p-1} \cdot (j\omega)^{p-1} + a_p \cdot (j\omega)^p} \\ &\triangleq \frac{(\text{Frequenzdynamik Eingangssignal})}{(\text{Frequenzdynamik Ausgangssignal})}. \end{aligned}$$

**Definition: Grenzfrequenz**

Die **Grenzfrequenz**  $\omega_G$  eines Systems wird dadurch ausgezeichnet, dass bei dieser Frequenz der Amplitudengang auf  $\frac{1}{\sqrt{2}}$  seines Werts bei der Frequenz  $\omega = 0$  abgefallen ist. Dies entspricht einem Rückgang um 3 db, weshalb man auch vom **3 db Punkt** spricht.

**Beschreibung von Signalen im Bildbereich**

Im Bildbereich kann die Dynamik von stationären und instationären Signalen richtig beschrieben werden. Bei ihm bezeichnet man das Äquivalent zum Frequenzgang als Übertragungsfunktion:

**Definition: Übertragungsfunktion**

Die **Übertragungsfunktion**  $G(s)$  eines Systems bestimmt sich über das Verhältnis der Laplace-Transformierten seiner Ein- und Ausgangssignale:

$$G(s) \equiv \frac{LT\{v(t)\}}{LT\{u(t)\}} = \frac{V(s)}{U(s)}.$$

$V(s)$  und  $U(s)$  symbolisieren die Bildbereich-Signale der Ein- und Ausgangsgrößen eines Systems.

**Berechnung: Übertragungsfunktion  $G(s)$  linearer Systeme**

$$\begin{aligned} G(s) &= \frac{LT\{v(t)\}}{LT\{u(t)\}} = \frac{b_0 + b_1 \cdot s^1 + \dots + b_{q-1} \cdot s^{q-1} + b_q \cdot s^q}{a_0 + a_1 \cdot s^1 + \dots + a_{p-1} \cdot s^{p-1} + a_p \cdot s^p} \\ &\triangleq \frac{(\text{Laplace-Dynamik Eingangssignal})}{(\text{Laplace-Dynamik Ausgangssignal})}. \end{aligned}$$

**Wichtige Feststellungen:**

1. Die Übertragungsfunktion  $G(s)$  lässt sich über die Gewichtsfunktion  $g(t)$  durch die Laplace-Transformation bestimmen:

$$G(s) = \text{LT}\{g(t)\} = \int_0^{\infty} g(t) \cdot e^{-s \cdot t} dt$$

2. Die Systemreaktion kann durch algebraische Multiplikation der Übertragungsfunktion  $G(s)$  und der Bildfunktion der Eingangsgröße  $U(s)$  berechnet werden:

$$V(s) = G(s) \cdot U(s)$$

**Die Laplace-Transformation zur Berechnung von Systemreaktionen:**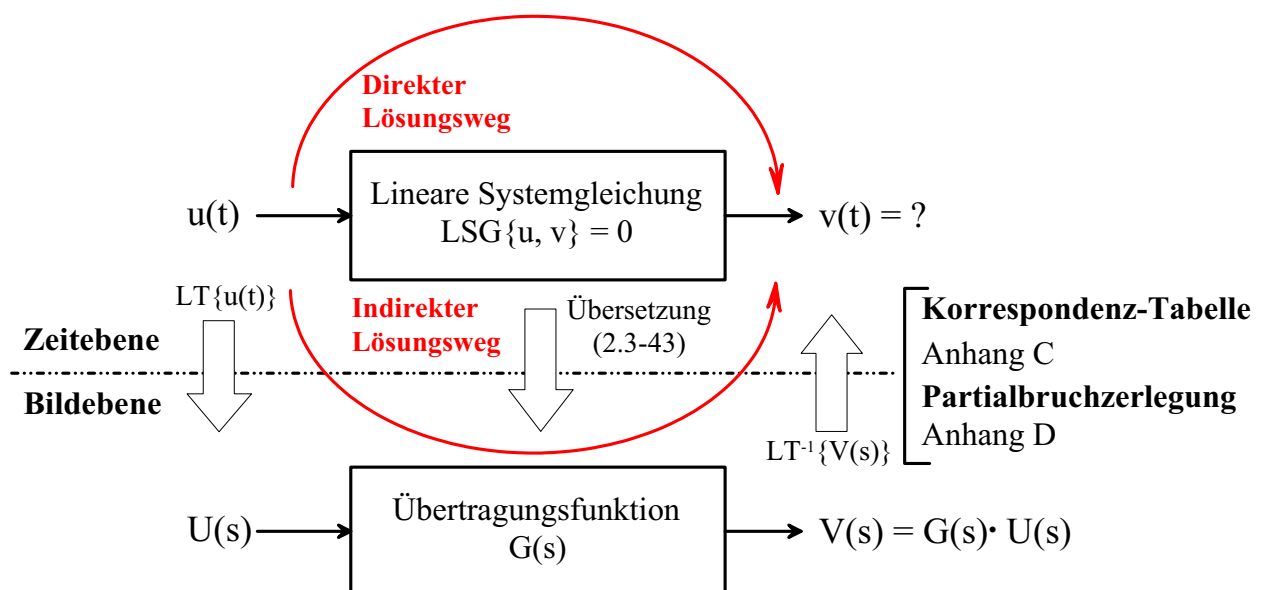**Physikalische Interpretation der Übertragungsfunktion:**

Die Übertragungsfunktion  $G(s)$  beschreibt die Eigendynamik eines Systems.

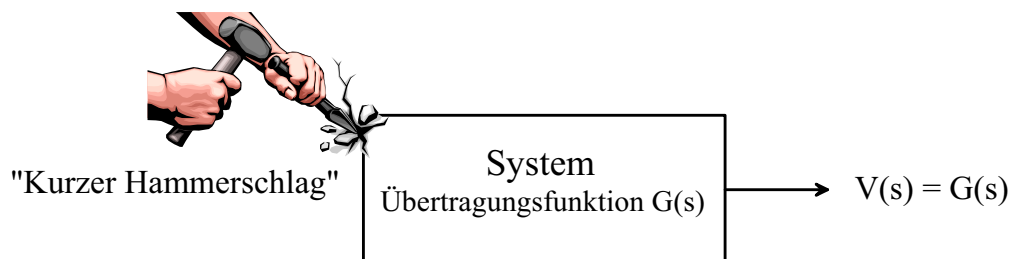

### Darstellungsformen: Übertragungsfunktion

Die rationale Übertragungsfunktion  $G(s)$  schreibt sich ohne Einschränkung der Allgemeinheit als Quotient eines Zähler- und Nennerpolynoms:

$$G(s) = \frac{b_0 + b_1 \cdot s^1 + \dots + b_q \cdot s^q}{a_0 + a_1 \cdot s^1 + \dots + a_p \cdot s^p} = \frac{ZP(s)}{NP(s)} \quad (\text{Polynomform})$$

$$G(s) = \frac{ZP(s)}{NP(s)} = \frac{b_q}{a_p} \cdot \frac{\prod_{k=1}^q (s - s_{Nk})}{\prod_{k=1}^p (s - s_{Pk})} \quad (\text{Pol-Nullstellen-Form})$$

$$G(s) = \frac{b_q}{a_p} \cdot \frac{\prod_{k=1}^q \frac{1}{T_{Nk}} (1 + s \cdot T_{Nk})}{\prod_{k=1}^p \frac{1}{T_{Pk}} (1 + s \cdot T_{Pk})} \quad (\text{Zeitkonstanten-Form})$$

wobei für die Zeiten gilt: für Nullstellen:  $T_{Ni} = -\frac{1}{s_{Ni}}$ ,

für Polstellen:  $T_{Pi} = -\frac{1}{s_{Pi}}$ .

### Definition: Charakteristisches Polynom und Charakteristische Gleichung

Das Nennerpolynom der Übertragungsfunktion  $G(s)$  bezeichnet man als **charakteristisches Polynom**. Es ist in unserer Schreibweise durch

$$NP(s) = a_0 + a_1 \cdot s^1 + \dots + a_p \cdot s^p = a_p \prod_{k=1}^p (s - s_{Pk}) .$$

gegeben. Die Gleichung zur Bestimmung der Polstellen nennt man die charakteristische Gleichung:

$$NP(s) = a_0 + a_1 \cdot s^1 + \dots + a_p \cdot s^p = 0 .$$

Die Lösungen der charakteristischen Gleichungen werden als **Wurzeln** bezeichnet.

### Bedeutung: Pol- und Nullstellen für Systeme:

|           | Polstellen                                                                                                                                                                                                                                                                                                      | Nullstellen                                                                                                                                                                                                                                                                                                                   |
|-----------|-----------------------------------------------------------------------------------------------------------------------------------------------------------------------------------------------------------------------------------------------------------------------------------------------------------------|-------------------------------------------------------------------------------------------------------------------------------------------------------------------------------------------------------------------------------------------------------------------------------------------------------------------------------|
| Lage      | $s_{Pk} = \sigma_{Pk} + j\omega_{Pk} \quad k = 1, \dots, p$                                                                                                                                                                                                                                                     | $s_{Nk} = \sigma_{Nk} + j\omega_{Nk} \quad k = 1, \dots, q$                                                                                                                                                                                                                                                                   |
| Bedeutung | <p>a) Ein extern angelegtes Signal der komplexen Frequenz <math>s = s_{Pi}</math> wird unendlich "hoch" verstärkt</p> <p>b) Die Polstellen legen die Zeitfunktion der Eigendynamik durch <math>e^{s_{Pk}}</math> fest.</p> <p><b>Und:</b></p> <p>c) Die Polstellen legen die Stabilität eines Systems fest.</p> | <p>a) Ein extern angelegtes Signal der komplexen Frequenz <math>s = s_{Ni}</math> wird vollständig unterdrückt.</p> <p>b) Die Nullstellen beeinflussen die prinzipielle Eigendynamik nicht.</p> <p><b>Aber:</b></p> <p>c) Nullstellen besitzen einen entscheidenden Einfluss auf den Amplitudenverlauf der Eigenbewegung.</p> |

### Behauptung: Stabiles System

Ein System ist genau dann **stabil**, wenn alle seine Pole, bestimmt durch die charakteristische Gleichung, vollständig im negativ reellen Bildbereich liegen:

$$\operatorname{Re}\{s_{Pk}\} < 0 \quad \text{für alle } k .$$



**Behauptung: Instabiles System**

Ein System ist genau dann **instabil**, wenn mindestens ein Pol seiner Übertragungsfunktion  $G(s)$  im positiv reellen Bildbereich liegt, **oder ein mehrfacher Pol auf der Imaginärachse  $j\omega$  vorkommt**:

$$\operatorname{Re}\{s_{p_k}\} > 0 \quad \text{für mindestens ein } k \in \{1, \dots, p\}$$

oder:

$$s_{p_k} = s_{p_j} \quad \text{mit } \operatorname{Re}\{s_{p_k}\} = \operatorname{Re}\{s_{p_j}\} = 0 \quad \text{und } j \neq k \in \{1, \dots, p\}.$$

**Behauptung: Grenzstabiles System**

Ein System ist genau dann **grenzstabil**, wenn kein Pol seiner Übertragungsfunktion  $G(s)$  im positiv reellen Bildbereich liegt, keine mehrfachen Pole auf der Imaginärachse auftreten, aber auf dieser mindestens eine einfache Polstelle vorhanden ist.

**Anwendung auf Systeme:**

|                             | <b>Eigenschaften</b>                                                                                                                                                                                                                                                                                                                                                                                             |
|-----------------------------|------------------------------------------------------------------------------------------------------------------------------------------------------------------------------------------------------------------------------------------------------------------------------------------------------------------------------------------------------------------------------------------------------------------|
| <b>Polstellen</b>           | Ein System ist genau dann stabil, wenn seine Polstellen in der negativ reellen Halbebene des Bildbereichs lokalisiert sind.                                                                                                                                                                                                                                                                                      |
| <b>Nullstellen</b>          | Nullstellen üben bei entsprechender Lage einen großen Einfluss auf die transiente Eigendynamik von Systemen aus.                                                                                                                                                                                                                                                                                                 |
| <b>Pol- und Nullstellen</b> | <p>a) Je weiter eine Pol- bzw. eine Nullstelle eines Systems von der Imaginärachse <math>j\omega</math> des Bildbereichs entfernt liegt, desto schneller fällt sein zeitliches Übergangsverhalten bei einem Zustandswechsel aus.</p> <p>b) Diejenigen Pol- bzw. Nullstellen, die näher bei der imaginären Achse <math>j\omega</math> im Pol-Nullstellenplan liegen, bestimmen maßgebend das Systemverhalten.</p> |

Für zusammengesetzte Systeme gilt:

**Berechnung: Serienschaltung**

Die **Gesamtübertragungsfunktion von in Serie geschalteten Systemen** berechnet sich durch Multiplikation der Einzelübertragungsfunktionen:

$$\text{Serienschaltung:} \quad G(s) = G_1(s) \cdot G_2(s) \cdot \dots \cdot G_n(s).$$

**Berechnung: Parallelschaltung**

Die **Gesamtübertragungsfunktion parallel geschalteter Systeme** berechnet sich durch die Addition der Einzelübertragungsfunktionen:

$$\text{Parallelschaltung:} \quad G(s) = G_1(s) + G_2(s) + \dots + G_n(s).$$

**Berechnung: Kreisschaltung**

Die **Übertragungsfunktion einer Kreisschaltung** lautet:

$$\text{Kreisschaltung:} \quad G(s) = \frac{G_1(s)}{1 \mp G_1(s) \cdot G_2(s)}.$$

Von Wichtigkeit ist allein die Feststellung, dass im Zähler der Übertragungsfunktion auch komplexer Kreisschaltungen nur die "Vorwärtssysteme" auftauchen und der Nenner die Addition der Konstanten Eins mit dem Produkt aller Kreissysteme aufweist.

Man unterscheidet bei Kreisschaltungen zwischen Mit- und Gegenkopplung. Bei der Mitkopplung addiert sich das rückgekoppelte Ausgangssignal der Kreisschaltung zum Eingangssignal. Die Subtraktion beider Wirkungen legt die Gegenkopplungsschaltung fest:

| Kopplungsart  | Vorzeichen |
|---------------|------------|
| Mitkopplung   | +          |
| Gegenkopplung | -          |

**Fazit: Laplace-Bereich**

Mit den Mitteln der konventionellen Mathematik und der Korrespondenztabelle für Laplace-Transformierte lassen sich die Differentialgleichungen von Systemen für beliebige Eingangssignale lösen.

Der Bildbereich stellt demnach ein ausgezeichnetes Hilfsmittel zur Beschreibung von Systemen dar und ist somit ein wichtiges Hilfsmittel zur Untersuchung und zum Entwurf von Regelkreisen.

# 3 Regelungstechnik

Die Regelungstechnik besitzt als Ingenieursaufgabe die Zielsetzung, anlagen, Maschinen und Prozesse derart zu gestalten, dass der Mensch von lästigen Kontrollaufgaben entledigt wird.

## 3.1 Grundbegriffe und Aufgaben von Regelungen

Die Grundbegriffe zur Beschreibung von Regelungen bzw. Regelkreisen sind:

### Definition: Regeln

Das **Regeln - die Regelung** - ist ein Vorgang, bei dem eine Größe, die zu regelnde Größe (Regelgröße), fortlaufend erfasst, mit einer anderen Größe, der Führungsgröße, verglichen und im Sinne einer Angleichung an die Führungsgröße beeinflusst wird.

### Wirkungsplan: Allgemeiner einschleifiger Regelkreis

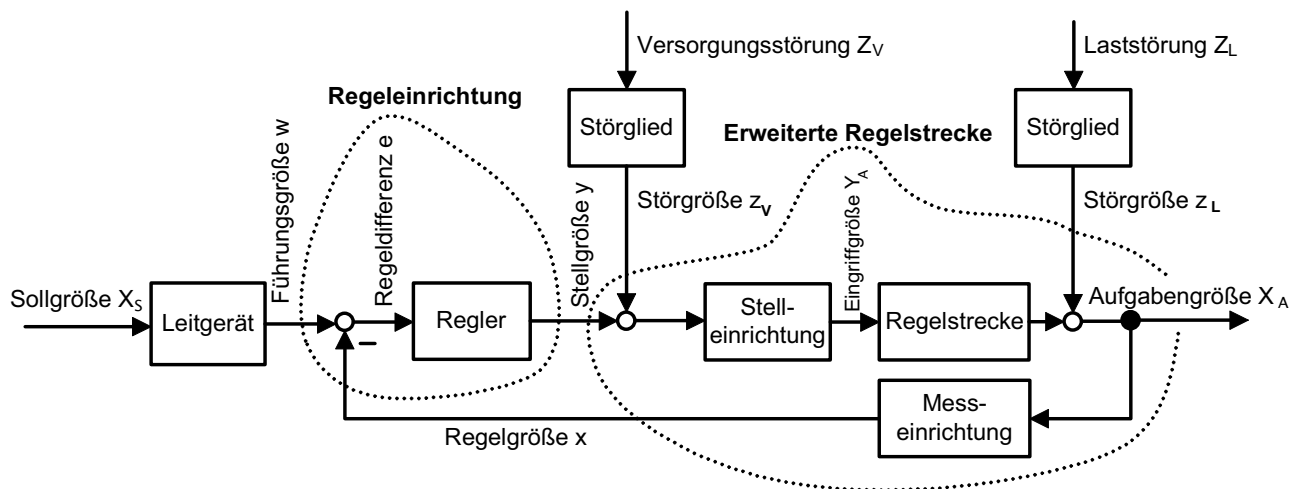

### Definition: Regelstrecke

Die **Regelstrecke** ist derjenige Teil des Wirkungswegs, welcher den aufgabengemäß zu beeinflussenden Bereich der Anlage bzw. des Prozesses darstellt.

### Definition: Stelleinrichtung

Die **Stelleinrichtung** besteht aus Stellantrieb und Stellglied. Sie verbindet den Reglerausgang mit dem Eingang der Regelstrecke.

### Definition: Messeinrichtung

Die **Messeinrichtung** wandelt die Aufgabengröße der Regelstrecke in ein weiter verwertbares Signal innerhalb des Regelkreises, die Regelgröße, um.

**Definition: Erweiterte Regelstrecke**

Die Regelstrecke bildet zusammen mit der Stell- und Messeinrichtung die **erweiterte Regelstrecke**.

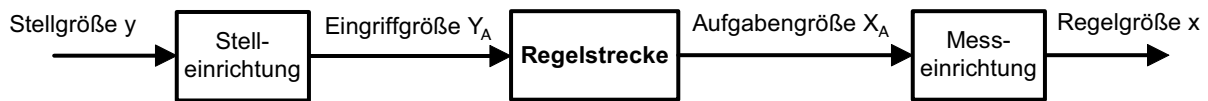**Definition: Regeleinrichtung**

Die **Regeleinrichtung** besteht aus demjenigen Teil des Wirkungswegs des Regelkreises, der die Beeinflussung der Regelstrecke zur Erfüllung der Regelungsaufgabe über die Stelleinrichtung bewirkt.

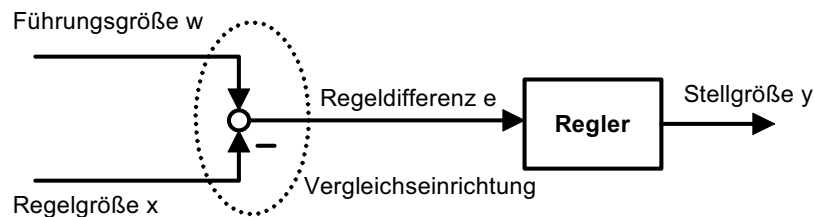**Definition: Vergleichseinrichtung**

Die **Vergleichseinrichtung** bestimmt die Abweichung der Führungsgröße von der Regelgröße, welche als Regeldifferenz  $e$  dem Regler zur Weiterverarbeitung dient.

**Definition: Regler**

Die prinzipielle Aufgabe eines **Reglers** besteht darin, eine ausgesuchte physikalische Größe (Aufgabengröße  $X_A$ ) auf einem vorgegebenen Sollwert (Sollgröße  $X_S$ ) zu bringen und dort zu halten.

**Definition: Leiteinrichtung bzw. Leitgerät**

Das **Leitgerät** gibt der Regelung ein technisch verarbeitbares Signal als Führungsgröße vor. Es wandelt dazu entweder eine eingangsseitige Sollgröße in die Führungsgröße um oder stellt selbst direkt die Führungsgröße zur Verfügung.

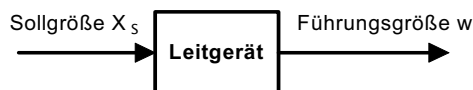**Definition: Störeinrichtung bzw. Störglied**

Ein **Störglied** beschreibt die Dynamik spezifischer externer Störeinflüsse auf den Regelkreis. Es wird vorwiegend bei der theoretischen Untersuchung von Regelungen benutzt.

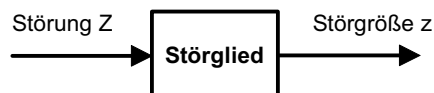

**Definition: Versorgungsstörungen**

Unterliegt der zu automatisierende Prozess Störungen bei der Versorgung mit Energie und/oder Material, liegt eine **Versorgungsstörung** vor.

**Definition: Laststörungen**

Wird die Aufgabengröße einer Regelung von nachfolgenden technischen Prozessen direkt beeinflusst, liegen **Laststörungen** auf den Regelkreis vor.

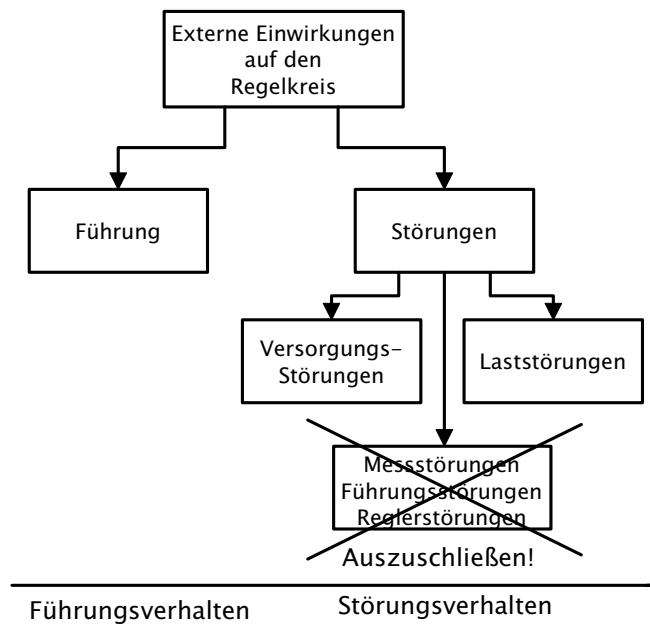**Wichtige Feststellung:**

Ein Regelkreis kann nur Störungen beseitigen, welche zwischen Ein- und Ausgang der Regelstrecke eingreifen. Damit müssen Messstörungen und Störungen auf die Führungsgröße bzw. auf die Regeleinrichtung unter allen Umständen vermieden werden.

Jede Regelung besitzt zwei Reaktionsarten auf äußere Einwirkungen:

**Definition: Führungsverhalten**

Das **Führungsverhalten** eines Regelkreises beschreibt die dynamische Auswirkung einer Veränderung der Führungsgröße auf die Aufgabengröße.

**Definition: Störverhalten**

Das **Störverhalten** eines Regelkreises gibt die dynamischen Auswirkungen von Versorgungs- und Laststörungen auf die Regelgröße an.

**Definition: Arbeitspunkt**

Der **Arbeitspunkt AP** repräsentiert den Wert einer Prozessgröße, in dessen unmittelbarer Umgebung der Prozess betrieben wird.

**Wirkungsplan: Standardisierter einschleifiger Regelkreis**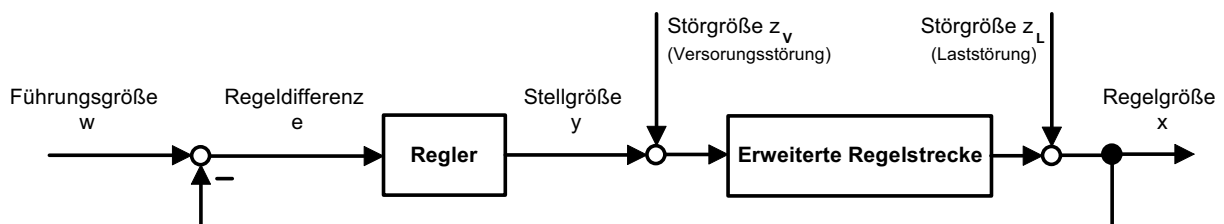

**Bezeichnung wichtiger Größen eines Regelkreises:**

| Bezeichnung           | Benennung                                                    | Beschreibung                                                                                                                                                      |
|-----------------------|--------------------------------------------------------------|-------------------------------------------------------------------------------------------------------------------------------------------------------------------|
| $X_A$                 | Aufgabengröße                                                | Die zu regelnde Größe eines Prozesses.                                                                                                                            |
| $x$                   | Regelgröße                                                   | Normiertes Signal der Aufgabengröße zur Weiterleitung bzw. Rückkopplung über die Regeleinrichtung (Abweichung vom Arbeitspunkt).                                  |
| $X_S$                 | Sollgröße                                                    | Vorgabewert, welche die Aufgabengröße annehmen soll.                                                                                                              |
| $w$                   | Führungsgröße                                                | Die Regelgröße $x$ soll der Führungsgröße $w$ unmittelbar folgen. Sie ist normiert und entspricht als Signalart der Regelgröße $x$ (Abweichung vom Arbeitspunkt). |
| $e = w - x$           | Regeldifferenz                                               | Ausgangsgröße des Vergleichs von Führungs- und Regelgröße. Sie wirkt auf den Regler als normiertes Signal.                                                        |
| $y$                   | Stellgröße                                                   | Normierte Ausgangswirkung des Reglers auf die Regelstrecke über das Stellglied der Anlage (Abweichung vom Arbeitspunkt).                                          |
| $Y_A$                 | Eingriffsgröße                                               | Unmittelbar einwirkende Größe auf den zu regelnden Vorgang, mit welcher die Stelleinrichtung den Prozess der Regelstrecke beeinflusst.                            |
| $Z$                   | Störung                                                      | Störungen sind alle von außen wirkende Größen, soweit sie die beabsichtigte Beeinflussung einer Regelung beeinträchtigen.                                         |
| $z$<br>$z_V$<br>$z_L$ | Störgröße allgemein<br>Versorgungsstörgröße<br>Laststörgröße | Normierte Störsignale zur Beurteilung von Regelungen beim Entwurf (Abweichung vom Arbeitspunkt).                                                                  |

**Definition: Festwertregelung oder Störgrößenregelung**

Bei der **Festwertregelung** oder **Störgrößenregelung** wird eine konstante Führungsgröße eingestellt. Der Regler hat die Aufgabe, die Regelgröße konstant auf dem Wert der Sollgröße zu halten.

**Definition: Zeitplanregelung (Programmregelung)**

Wird die Führungsgröße nach einem Zeitplan verändert, spricht man von einer **Zeitplan-** oder **Programmregelung**.

**Definition: Folgeregelung oder Nachlaufregelung**

Ändert sich die Sollgröße (Führungsgröße) fortlaufend, liegt eine **Folgeregelung** bzw. **Nachlaufregelung** vor. Die Regelgröße hat dieser Führungsänderung optimal zu folgen.

**Anforderungen an Regelungen:****Genauigkeit (Stationäre Regelgüte)**

Der Regler soll i. a. gewährleisten, dass die Regelgröße  $x(t)$  der Führungsgröße  $w(t)$  asymptotisch folgt. Die sog. bleibende Regeldifferenz hat zu verschwinden:

$$e(\infty) = \lim_{t \rightarrow \infty} (e(t)) = \lim_{t \rightarrow \infty} (w(t) - x(t)) = 0.$$

**Schnelligkeit (Dynamische Regelgüte)**

Bei einer Änderung der Führungsgröße  $w(t)$  wird erwartet, dass die Regelgröße  $x(t)$  unmittelbar folgt und nicht nur asymptotisch (nach langer Zeit). Die dynamische Regelgüte lässt sich geeignet mit Hilfe von Sprungsignalen darstellen:

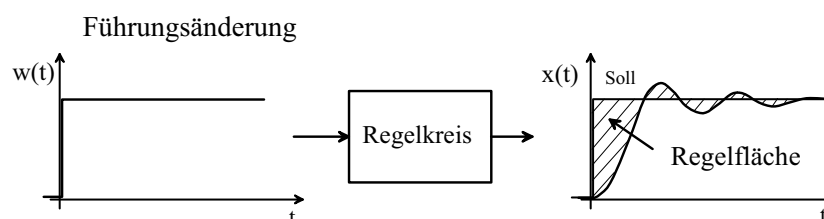

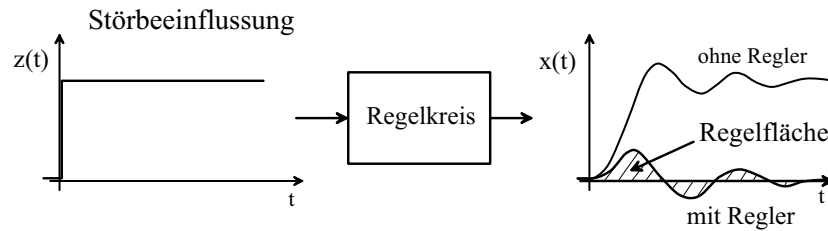

### Stabilität

Ein Regelkreis hat immer stabil zu sein.

### Robustheit

Ein Regelkreis hat robust zu sein, d. h., der Regler muss auch auf Veränderungen der Regelstrecke während des Betriebs richtig reagieren.

Erfüllt eine Regelung die beide letzten Forderungen, liegt ein Regelkreis mit robuster Stabilität vor.

## 3.2 Regelstrecken und Regeleinrichtungen

Zur Beurteilung von Regelstrecken sind folgende Begriffe nach DIN 19226 von Bedeutung:

### Definition: Stellort

Der **Stellort** ist die Stelle eines Regelkreises, bei der die Stelleinrichtung auf die Regelstrecke einwirkt.

### Definition: Messort

Die Aufgabengröße einer Regelung wird am **Messort** der Regelstrecke erfasst.

Die Separierung von Regelstrecke und Regeleinrichtung im Regelkreises geschieht zwischen Stell- und Messort.

### Definition: Ausgleichsverhalten

Eine Regelstrecke (System) verhält sich **ohne Ausgleich**, wenn nach einem begrenzten Eingangssignal das System auf keinen neuen Beharrungszustand zustrebt. Stellt sich ein neuer Beharrungszustand ein, liegt eine **Strecke mit Ausgleich** vor.

Für Regelstrecken mit Ausgleich gelten folgende Kennwerte:

### Definition: Verzugszeit $T_u$

Die **Verzugszeit  $T_u$**  ist der Zeitabschnitt, der von Beginn des Übergangs bis zu der Wendetangente einer Sprungantwort dauert.

### Definition: Ausgleichszeit $T_g$

Die **Ausgleichszeit  $T_g$**  ist die Zeit, die für den Übergang vom Ausgangszustand zum neuen Beharrungswert benötigt wird, als verlief dieser entlang der Wendetangente an die Sprungantwort.

### Definition: Überschwingweite

Die **Überschwingweite  $X_{\bar{U}}$**  kennzeichnet die maximale Amplitude, mit der das Ausgangssignal bei einem Zustandswechsel über den neuen Beharrungswert hinaus schwingt.

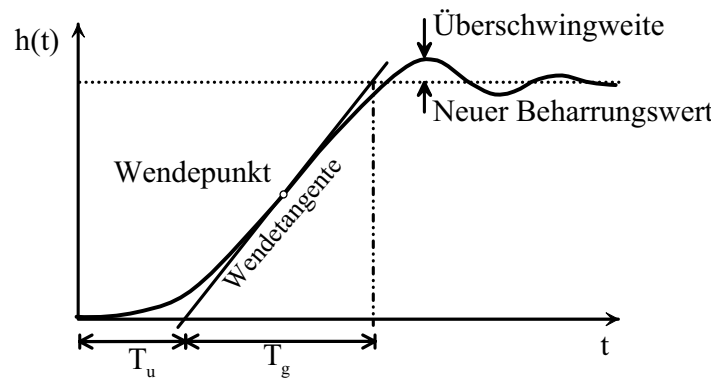

### Definition: Schwierigkeitsgrad einer Regelstrecke

Ein Kriterium für die Regelbarkeit von Strecken höherer Ordnung ist der **Schwierigkeitsgrad S**, welcher durch das Verhältnis

$$S = \frac{\text{Verzugszeit}}{\text{Ausgleichszeit}} = \frac{T_u}{T_g}$$

berechnet wird.

### Es gilt für Strecken mit Ausgleich:

Je kleiner der Schwierigkeitsgrad S ist, desto besser ist die Strecke regelbar.

### Regelbarkeit und Verzögerungsordnung einer Regelstrecke

Die Regelbarkeit lässt sich als Kehrwert des Schwierigkeitsgrads S angeben. Für stark verzögernde Strecken mit jeweils gleichen Verzögerungszeiten ergibt sich ein näherungsweise Zusammenhang zwischen Verzögerungsordnung und Regelbarkeit:

$$S^{-1} = \frac{T_g}{T_u} \approx \frac{10}{n-1}.$$

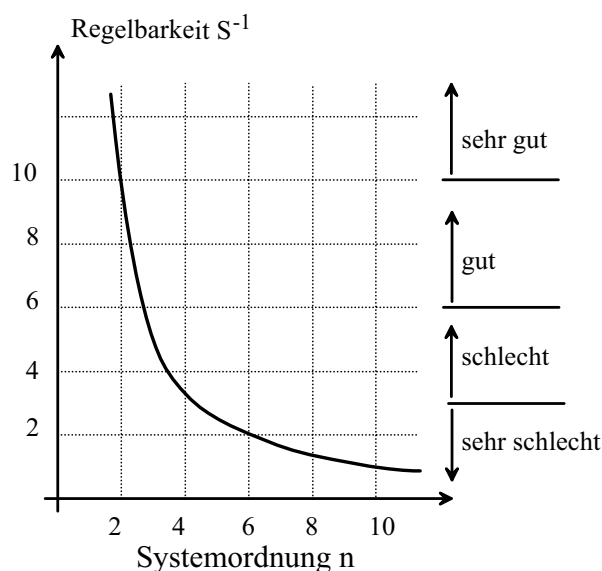

### Für Regelstrecken ohne Ausgleich gilt:

Strecken ohne Ausgleich sind i. a. schlecht regelbar.



**Einteilung von Regelstrecken:**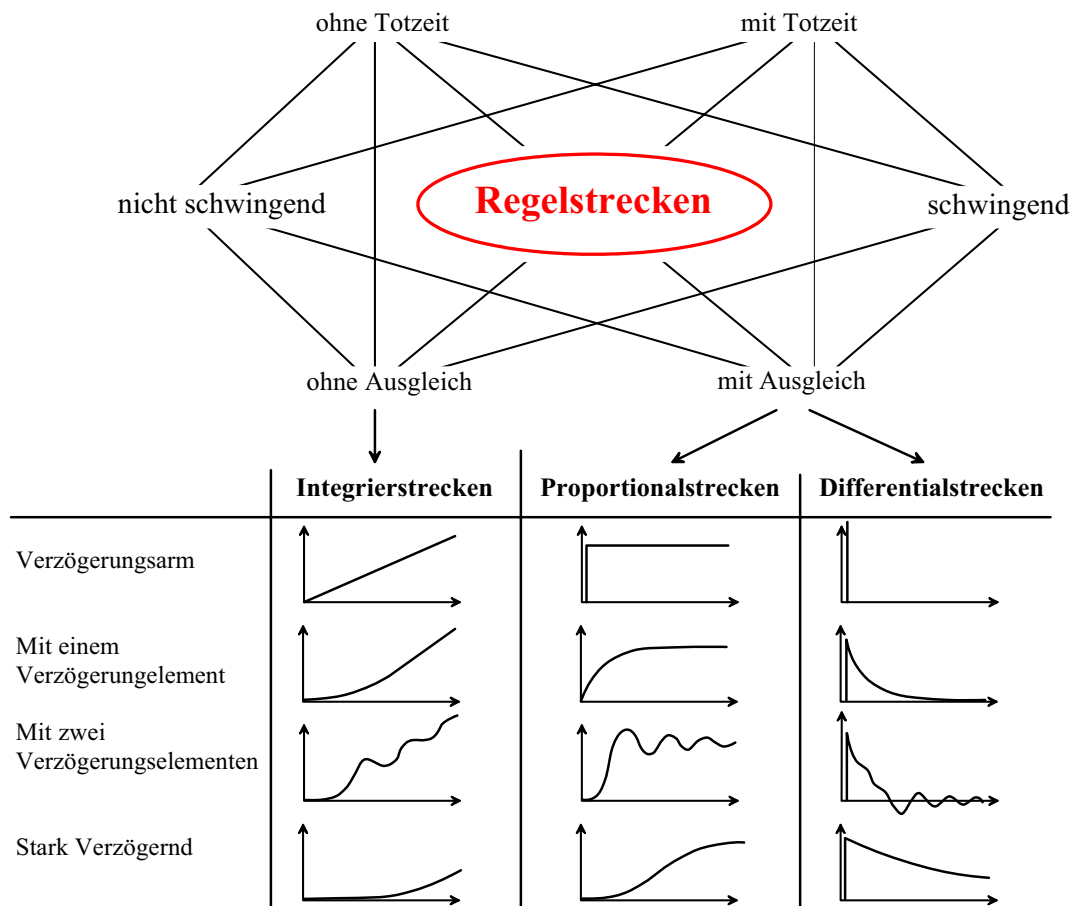**Aufgabe, Aufbau und Einteilung von Regeleinrichtungen:**

Die Regeleinrichtung ist derjenige Teil des Wirkungswegs, welcher die aufgabengemäße Beeinflussung der Regelstrecke über die Stelleinrichtung bewirkt.

Die Regeleinrichtung besteht aus:

- 1) Vergleichseinrichtung von Regelgröße mit Führungsgröße und
- 2) Regler zur Bildung der Stellgröße.

Die Vergleichseinrichtung überprüft als Eingangsglied der Regeleinrichtung die Regelgröße  $x$  mit der Führungsgröße  $w$  auf Abweichung. Das Ergebnis ist die Regeldifferenz  $e(t)$ . Sie dient als Regelmaß für den Regler.

Der Regler generiert aus der Regeldifferenz eine für die Regelstrecke geeignete dynamische Stellgröße, welche den Anforderungen der Regelaufgabe nachkommt. Bei Bedarf stellt er sie als leistungsstarkes Ausgangssignal zur Verfügung.

### Einteilung von Reglern:

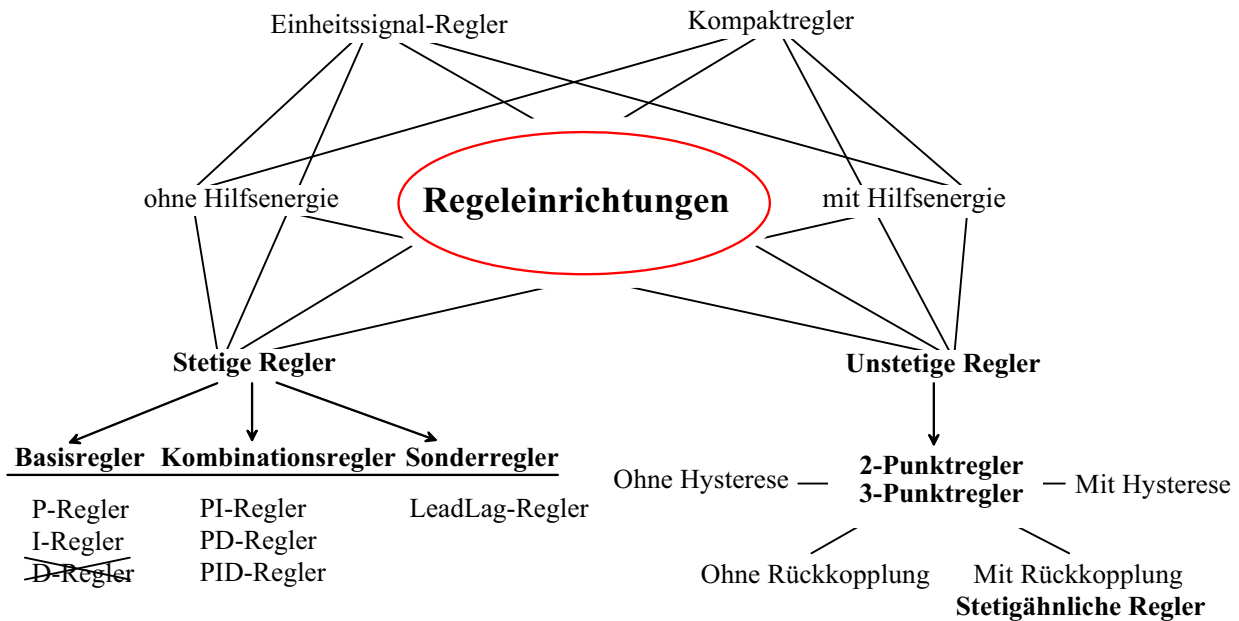

#### Definition: Regler ohne und mit Hilfsenergie

Muss dem Stellsignal eines Reglers Energie über einen Verstärker zugeführt werden, um für die Beeinflussung der erweiterten Regelstrecke genug Leistung zu besitzen, spricht man von einem **Regler mit Hilfsenergie**.

Liefert die Vergleichseinrichtung einer Regeleinrichtung zur Betätigung der Stelleinrichtung ausreichend viel Energie, liegt ein **Regler ohne Hilfsenergie** vor.

#### Definition: Einheitssignal-Regler

**Einheitssignal-Regler** arbeiten mit genormten Ein- und Ausgangssignalbereichen und lassen sich deshalb zum Aufbau unterschiedlicher Regelkreise verwenden.

#### Definition: Kompaktregler/Messwerkregler

Ein **Kompaktregler** oder **Messwerkregler** besteht aus Messeinrichtung, Sollwertsteller, Vergleichseinrichtung und Regler. Er ist für spezielle Aufgabengrößen ausgelegt.

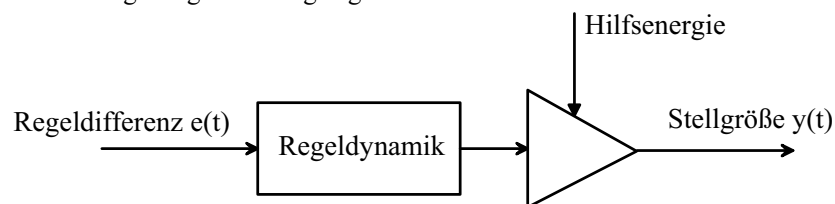

#### Definition: Stetiger Regler

Ein **stetiger Regler** generiert aus dem kontinuierlich-analogen Eingangssignal (der Regeldifferenz) ein kontinuierlich-analoges Stellsignal, das jeden Wert des Stellbereichs annehmen kann. Er greift über das Stellsignal stetig in die Streckenprozesse ein.

#### Definition: Unstetiger Regler

Ein **unstetiger Regler** erzeugt als Reaktion auf ein kontinuierlich-analoges Eingangssignal nur eine beschränkte Anzahl von Stellwerten für die Regelstrecke.

**Definition: Stellbereich  $Y_h$** 

Der **Stellbereich  $Y_h$**  eines Reglers ist der gesamte Signalbereich, in dem die Stellgröße Einfluss auf die Regelstrecke nehmen kann, um eine evtl. vorhandene Regeldifferenz zum Verschwinden zu bringen.

**Definition: Zweipunktregler**

Der **Zweipunktregler** weist als unstetiger Regler nur zwei Zustände der Stellgröße  $y(t)$  auf. Die Stellgröße  $y(t)$  mit den Werten  $y_0$  und  $y_1$  muss innerhalb des Stellbereichs  $Y_h$  liegen.

**Definition: Dreipunktregler**

Bei einem **Dreipunktregler** kann die Stellgröße  $y(t)$  nur drei Werte innerhalb des Stellbereichs  $Y_h$  annehmen.

**Definition: Unstetiger Regler mit Hysterese**

Bei **unstetigen Reglern mit Hysterese** differieren die Schaltpunkte zwischen zwei Schaltzuständen um einen einstellbaren Wert.

Unstetige Regler werden durch folgende Kennwerte beschrieben:

**Definition: Schwankungsbreite  $\Delta x$** 

Die **Schwankungsbreite  $\Delta X$**  einer unstetigen Regelung stellt den Bereich der Regelgröße  $x(t)$  dar, innerhalb dessen sie periodische Schwankungen bei konstant anliegender Führungsgröße ausführt.

**Definition: Schaltfrequenz und Schaltdauer**

Die **Schaltfrequenz  $f_s$**  einer unstetigen Regelung wird durch die Schaltdauer  $T_s$  der Regelschwingung bestimmt, die unter stationären Bedingungen auftreten.

**Definition: Mittlere Regelgröße**

Die **mittlere Regelgröße  $\bar{x}$**  bei unstetigen Reglern beschreibt die Lage der "gedachten" Regelgröße innerhalb der Schwankungsbreite, bei welcher die eingeschlossenen Flächen zur Regelgröße unterhalb und oberhalb gleich groß sind.

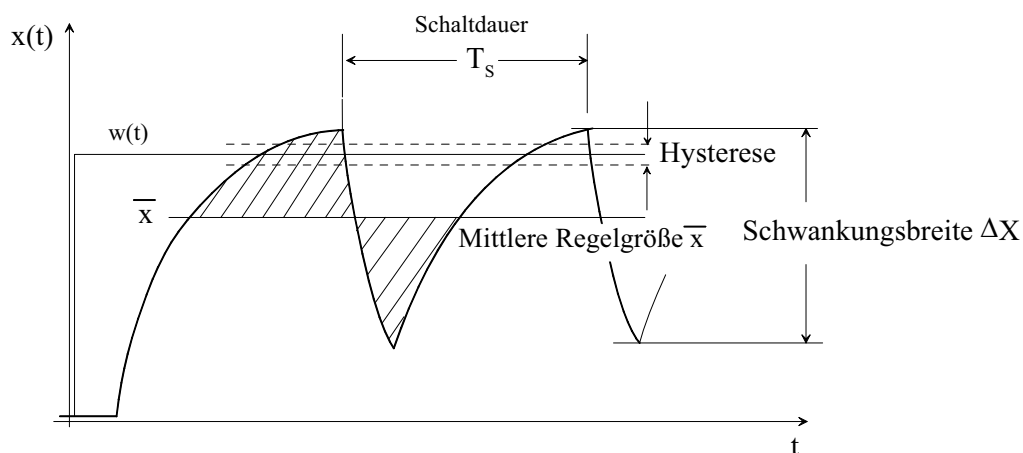**Definition: Grundlast**

Die **Grundlast** stellt einen fest eingestellten Wert der Stellgröße eines unstetigen Reglers dar, welche nicht geschaltet werden kann.

**Definition: Unstetige Regler mit Rückkopplung**

Bei **unstetigen Reglern mit Rückkopplung** wird die Stellgröße des Reglers über ein Zeitglied subtraktiv auf seinen Eingang zurückgeführt.

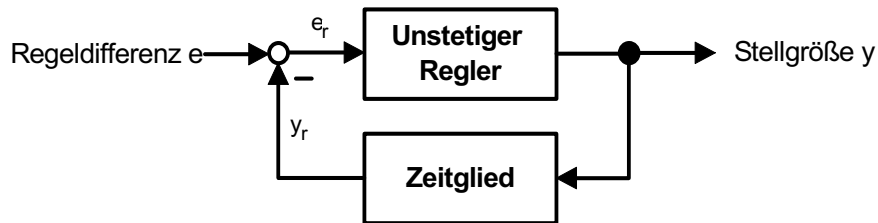

### Definition: Stetigähnlicher Regler

Unstetige Regler mit Rückkopplung bezeichnet man als **stetigähnliche Regler** oder **quasistetige Regler**, da sie ähnliche Regelverhalten wie die stetig wirkenden Regler aufweisen.

### Maßnahmen zur Reduzierung der Schwankungsbreite $\Delta X$ einer Regelgröße:

- (1) Verkleinerung der Verzugszeit der Regelstrecke.
- (2) Vergrößerung ihrer Ausgleichszeit.
- (3) Der Regelkreis wird mit dauernd eingeschalteter Grundlast betrieben und die Regelung auf den Arbeitspunkt in einem verkleinerten Arbeitsbereich  $X_h$  vorgenommen.
- (4) Die Verwendung stetigähnlicher Regler anstelle einfacher Schaltregler verbessert bei richtiger Parameterwahl die Schwankungsbreite der Regelgröße erheblich. Durch die geeignete Auswahl der Rückkopplungsdynamik erzielt man ein gutes Führungs- bzw. Störverhalten der Regelung.

Für stetige Regler gelten folgende Definitionen und Verhaltensweisen:

### Definition: Regelbereich

Der **Regelbereich**  $X_h$  eines Reglers beschreibt den maximalen Aussteuerbereich eines Reglers.

### Definition: Proportionalbereich

Der **Proportionalbereich**  $X_p$  gibt denjenigen Wertebereich der Regeldifferenz  $e$  an, innerhalb dessen ein P-Regler den Stellbereich  $Y_h$  einer Stelleinrichtung proportional ansteuern kann.

### Definition: P-Regler

Der **P-Regler** stellt ein System dar, welches eine zur Regeldifferenz  $e(t)$  proportionale Stellgröße  $y(t)$  generiert:

$$y(t) = K_{PR} \cdot e(t) .$$

Sein Proportionalbeiwert bzw. Verstärkungsfaktor  $K_{PR}$  wird durch den Stell- und Proportionalbereich festgelegt:

$$K_{PR} = \frac{\text{Stellbereich } Y_h}{\text{Proportionalbereich } X_p} .$$

Der P-Regler besitzt die Eigenschaft:

**Der P-Regler arbeitet ungenau!**

**Definition: I-Regler**

Der **I-Regler** stellt ein dynamisches System dar, das eine zum Zeitintegral der Regeldifferenz  $e(t)$  proportionale Stellgröße  $y(t)$  erzeugt:

$$y(t) = K_{\text{IR}} \int_0^t e(t) dt \quad \text{oder:} \quad \dot{y}(t) = K_{\text{IR}} \cdot e(t).$$

Der Integrierbeiwert  $K_{\text{IR}}$  gibt die Änderungsgeschwindigkeit der Stellgröße  $y(t)$  vor. Er wird bestimmt durch:

$$K_{\text{IR}} = \frac{\text{Maximale Stellgeschwindigkeit } \dot{y}_{\text{max}}}{\text{Proportionalbereich } X_p}$$

Der I-Regler wirkt verzögernd. Die Verzögerungszeit bezeichnet man als Integrierzeit  $T_{\text{IR}}$ . Sie berechnet sich zu:

$$T_{\text{IR}} = \frac{Y_h}{K_{\text{IR}} \cdot X_h}.$$

Kennzeichen eines I-Reglers ist:

**Ein Regelkreis kann nur Störungen beseitigen, welche zwischen Ein- und Ausgang der Regelstrecke eingreifen. Damit müssen Messstörungen und Störungen auf die Führungsgröße bzw. auf die Regeleinrichtung unter allen Umständen vermieden werden.**

**Definition: D-Regler**

Der **D-Regler** reagiert nur auf zeitliche Änderungen der Regeldifferenz  $e(t)$  durch ein der Änderungsgeschwindigkeit proportionales Stellsignal:

$$y(t) = K_{\text{DR}} \cdot \dot{e}(t).$$

Leider muss für den D-Regler festgestellt werden:

**Der D-Regler ist für sich alleine nicht zu gebrauchen!**

**Definition: PI-Regler**

Im **PI-Regler** überlagern sich die Wirkungen von P- und I-Reglern durch Parallelschaltung. Seine Systemgleichung lautet:

$$y(t) = K_{\text{PR}} \left( e(t) + \frac{1}{T_{\text{NR}}} \int_0^t e(t') dt' \right).$$

Seine beiden Kennwerte bestimmen das Reglerverhalten. Für die Nachlaufzeit gilt:

$$T_{\text{NR}} = \frac{K_{\text{PR}}}{K_{\text{IR}}} = K_{\text{PR}} \cdot T_{\text{IR}}.$$

Die Vorzüge des PI-Reglers sind:

**Der PI-Regler arbeitet schnell und präzise!**

**Definition: PD-Regler**

Der ideale PD-Regler addiert die Wirkungen von P- und D-Reglern. Seine Systemgleichung lautet:

$$y(t) = K_{\text{PR}} (e(t) + T_v \cdot \dot{e}(t)).$$

Der Proportionalbeiwert  $K_{\text{PR}}$  bzw. Proportionalbereich  $X_p$  und die Vorlaufzeit  $T_v$  beschreiben seine Kennwerte. Zwischen ihnen besteht die Beziehung:

$$T_{\text{VR}} = \frac{K_{\text{DR}}}{K_{\text{PR}}}.$$

Zusammengefasst lässt sich über den PD-Regler aussagen:

**Der PD-Regler reagiert sehr schnell, aber ungenau!**

**Definition: PID-Regler**

Der **PID-Regler** kombiniert alle drei Basisregler zu einem universellen Regler durch Parallelschaltung von P- I- und D-Reglern. Seine Systemgleichung lautet:

$$y(t) = K_{PR} \left( e(t) + \frac{1}{T_{NR}} \int_0^t e(t') dt' + T_{VR} \cdot \dot{e}(t) \right).$$

Durch die Vorgabe bestimmter Zeitkennwerte lassen sich auch P-, PI- und PD-Verhalten einstellen:

|                                              |                         |
|----------------------------------------------|-------------------------|
| $T_{NR} \rightarrow \infty$                  | $\Rightarrow$ PD-Regler |
| $T_{VR} = 0$                                 | $\Rightarrow$ PI-Regler |
| $T_{NR} \rightarrow \infty$ und $T_{VR} = 0$ | $\Rightarrow$ P-Regler  |

Summa summarum gilt für den PID-Regler:

**Der PID-Regler kann als Universalregler bezeichnet werden!**

**Sonderregler** werden bei Strecken angewendet, die schwer zu stabilisieren sind. Ihre Wirkung korrigieren in erster Linie das schlecht zu regelnde Zeitverhalten der Regelstrecke, weshalb man sie auch gern als **Korrekturglieder** bezeichnet.

**Definition: Lead-Korrekturglied**

Das **Lead-Korrekturglied** (Lead-Regler) stellt einen realen PD-Regler mit Verzögerung dar, bei dem die dominante Wirkung die D-Wirkung übernimmt. Seine Übertragungsfunktion schreibt sich in etwas abgeänderter Form:

$$G_{\text{Lead}}(s) = \frac{1 + s \cdot T}{1 + s \cdot \alpha T} \quad \text{mit : } 0 < \alpha < 1.$$

**Definition: Lag-Korrekturglied**

Beim **Lag-Korrekturglied** (Lag-Regler) als realem PD-System dominiert das proportionale Verhalten die Gesamtwirkung, was durch das Größenverhältnis der Zeitkennwerte in der Übertragungsfunktion

$$G_{\text{Lag}}(s) = \frac{1 + s \cdot T}{1 + s \cdot \beta T} \quad \text{mit : } \beta > 1.$$

durch den Parameter  $\beta$  zum Ausdruck gebracht wird.

**Definition: Lead-Lag-Korrekturglied**

Das **Lead-Lag-Korrekturglied** (Lead-Lag-Regler) besteht aus einem in Serie geschalteten Lead- und Lag-Regler mit der Übertragungsfunktion:

$$G_{\text{Lead-Lag}}(s) = \frac{(1 + s \cdot T_1)(1 + s \cdot T_2)}{(1 + s \cdot \frac{T_1}{\beta})(1 + s \cdot \beta T_2)} \quad \text{mit : } T_2 > T_1 \quad \text{und} \quad \beta < 1.$$

Richtlinien zur Auswahl stetiger Reglern sind:

- Will man die Führungsgröße exakt einstellen, benötigt man ein I-Regelverhalten. Dazu ist Zeit notwendig, weshalb kein schnelles Beseitigen der Regelfehler erwartet werden kann.
- Das Hinzufügen von P- und D-Regelverhalten beschleunigt die Regeldynamik.
- Mit der D-Dynamik sollte man vorsichtig umgehen, da sie Regelkreise sehr leicht instabil werden lässt. Sie verursacht auch eine Verstärkung "verrauschter" Signale, weshalb bei ihrer Verwendung eine hohe Signalqualität Voraussetzung ist.
- D-Regleranteile sind dann günstig anzuwenden, wenn von Maschinen, Anlagen und nicht zuletzt von Menschen Gefahren abgewandt werden müssen, die von unvorhersehbaren Eingriffen ausgehen.
- Die Lead-Lag-Korrekturglieder dienen der Verbesserung der Regeldynamik. Für schwierig zu regelnde Strecken setzt man sie kombiniert mit den Standardreglern ein.

### 3.3 Der Standard-Regelkreis

Die gemeinsame Dynamik von Regler und Regelstrecke verlangt nach einer quantitativen Beschreibung durch Kennwerte in Hinsicht auf

- (1) Genauigkeit und (2) Schnelligkeit.

Im Bildbereich reagiert der Regelkreis auf die Führungsänderungen und Versorgungs- bzw. Laststörung gemäß:

$$X(s) = \frac{G_s(s) \cdot G_R(s)}{1 + G_s(s) \cdot G_R(s)} W(s) + \frac{G_s(s)}{1 + G_s(s) \cdot G_R(s)} Z_v(s) + \frac{1}{1 + G_s(s) \cdot G_R(s)} Z_L(s)$$

Die Reduktion der Versorgungs- und Laststörungen mit ihren unterschiedlichen Eingriffsorten auf alleinige Versorgungsstörungen führt zum Standard-Regelkreis mit nur einer Störgröße z:

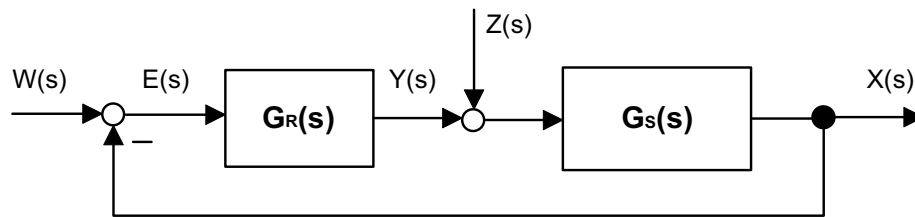

Die Dynamik des Standard-Regelkreises lautet:

$$X(s) = \frac{G_s(s) \cdot G_R(s)}{1 + G_s(s) \cdot G_R(s)} W(s) + \frac{G_s(s)}{1 + G_s(s) \cdot G_R(s)} Z(s)$$

Die Übertragungsfunktionen des Standard-Regelkreises sind:

**Definition: Führungsübertragungsfunktion  $G_W(s)$**

Die **Führungsübertragungsfunktion  $G_W(s)$**  gibt die Wirkung der Führungsgröße  $W(s)$  auf die Regelgröße  $X(s)$  an. Für den einschleifigen Standard-Regelkreis berechnet sie sich durch:

$$G_W(s) := \frac{X(s)}{W(s)} = \frac{G_s(s) \cdot G_R(s)}{1 + G_s(s) \cdot G_R(s)}$$

**Definition: Störübertragungsfunktion  $G_Z(s)$**

Mit der **Störübertragungsfunktion  $G_Z(s)$**  lassen sich Wirkungen externer Störungen auf einen Regelkreis berechnen. Für Versorgungsstörungen auf den Standard-Regelkreis lauten sie:

$$G_Z(s) := \frac{X(s)}{Z(s)} = \frac{G_s(s)}{1 + G_R(s) \cdot G_S(s)}$$

**Definition: Übertragungsfunktion des offenen Regelkreises  $G_o(s)$**

Die Eigendynamik eines nicht geschlossenen Regelkreises, der also keine Rückkopplung aufweist, wird durch die **Übertragungsfunktion des offenen Regelkreises** beschrieben. Für den einfachen Standard-Regelkreis lautet sie:

$$G_o(s) := \frac{X(s)}{E(s)} = G_R(s) \cdot G_S(s)$$

Der geschlossene Wirkungsablauf einer Regelung wird durch den Regelfaktor beschrieben:

**Definition: Dynamischer Regelfaktor  $R(s)$**

Der **dynamische Regelfaktor  $R(s)$**  beschreibt die Rückwirkungsdynamik eines Regelkreises. Er stellt ein Maß für die Empfindlichkeit der Regelgröße auf direkte äußere Einflüsse dar und ist gegeben durch:

$$R(s) := \frac{1}{1 + G_0(s)} = \frac{1}{1 + G_R(s) \cdot G_S(s)}$$

Man bezeichnet ihn auch als Empfindlichkeitsfunktion eines Regelkreises.

Die Aufgabenerfüllung jeder Regelung drückt sich durch den Regelfaktor  $R(s)$  aus:

$$\frac{E(s)_{\text{mit Regelung}}}{E(s)_{\text{ohne Regelung}}} = R(s)$$

**Es gilt:**

Eine Regelung arbeitet um so besser, je kleiner der Wert des dynamischen Regelfaktors  $R(s)$  ausfällt.

Das stationäre Regelkreisverhalten beschreibt:

**Definition: Statischer Regelfaktor  $r$**

Der **statische Regelfaktor  $r$**  beschreibt die statische Rückwirkung innerhalb eines Regelkreises. Er ist gegeben durch:

$$r := R(0) = \frac{1}{1 + G_0(0)} = \frac{1}{1 + G_R(0) \cdot G_S(0)}$$

**Führungsverhalten:  $Z(s) = 0$  und  $W(s) \neq 0$**

Führungsgleichung: 
$$X(s) = G_W(s) \cdot W(s) = \frac{G_R(s) \cdot G_S(s)}{1 + G_R(s) \cdot G_S(s)} \cdot W(s)$$

Führungsregler: 
$$G_R(s) = \frac{1}{G_S(s)} \frac{G_W(s)}{1 - G_W(s)}$$

**Definition: Perfekter bzw. idealer Regler**

Der **perfekte bzw. ideale Regler** folgt der Führungsgröße exakt und eliminiert jede Störung unmittelbar. Seine Übertragungsfunktionen für den Regelkreis lauten:

Führungsübertragungsfunktion:  $G_W(s) = 1$  und

Störübertragungsfunktion:  $G_Z(s) = 0$ .

⇒ Der perfekte Regler für optimales Führungsverhalten lautet:

$$G_{R, \text{Perfekt}}(s) = \frac{1}{G_S(s)} \frac{1}{1 - G_W(s)} \rightarrow \infty$$

Ein unrealistischer Regler!

Aber: **Merkregel:**

Je größer die Regelverstärkung ausfällt, desto größer ist die Regelgenauigkeit, d. h. je exakter erfüllt der Regler seine Aufgabe.

Das fast perfekte Führungsverhalten ist: P-T<sub>1</sub>-Verhalten

⇒ Fast perfekter Regler: 
$$G_R(s) = \frac{1}{G_S(s)} \underbrace{\frac{1}{s \cdot T_1}}_{\text{I-Anteil}}$$



**Merkregeln:**

Will man ein genaues Führungsverhalten, welches zwar verzögert eintritt, so muss der Regler ein I-Verhalten aufweisen.

Eine exakte Regelgenauigkeit im stationären Zustand erzielt man, wenn entweder die Regelstrecke oder der Regler integrales Verhalten besitzt.

Regler lassen sich für Regelstrecken durch die Vorgabe des Führungsverhaltens berechnen. Eine Überprüfung auf ihre technische Realisierung muss anschließend gewährleistet sein.

**Störverhalten:**  $W(s) = 0$  und  $Z(s) \neq 0$ .

Störungsgleichung:  $X(s) = G_Z(s) \cdot Z(s) = \frac{G_s(s)}{1 + G_0(s)} \cdot Z(s)$

Störungsregler:  $G_R(s) = \frac{1}{G_Z(s)} - \frac{1}{G_S(s)}$

$\Rightarrow$  Der perfekte Regler für ein optimales Störungsverhalten:

$$G_{R, \text{Perfekt}}(s) = \frac{1}{G_Z(s) \rightarrow 0} - \frac{1}{G_S(s)} \rightarrow \infty$$

**Merkregeln:**

Ein perfekter Regler existiert auch zur Unterdrückung von Störungen nicht.

Durch eine große Regelkreisverstärkung gewinnt man eine hohe Regelgenauigkeit.

Das statische und dynamische Verhalten eines Regelkreises wird durch Regelgüten beurteilt:

**Definition: Regelgüte**

Die **Regelgüte** eines Regelkreises stellt ein Maß der Abweichung zwischen Regelgröße  $x(t)$  und Führungsgröße  $w(t)$  dar.

**Definition: Bleibende Regeldifferenz**

Die **bleibende Regeldifferenz**  $e_s$  stellt die Abweichung zwischen Führungs- und Regelgröße im Beharrungsverhalten nach einem angelegten Eingangssignal dar.

$$e_s = \lim_{t \rightarrow \infty} (e(t)) = \lim_{t \rightarrow \infty} (w(t) - x(t))$$

**Definition: Dynamische Regelgüte**

Die **dynamische Regelgüte** definiert sich als vorübergehende Regeldifferenz während des Einschwingvorgangs auf einen neuen Beharrungswert. Sie beschränkt sich auf den Zeitraum des Ausgleichvorgangs.

**Definition: Regelkreisgenauigkeit**

Ein Regelkreis ist **genau**, wenn er im Beharrungszustand den Sollwert ausreichend genau einhält, sich also innerhalb eines vorgegebenen Toleranzbereichs um die Führungsgröße aufhält.

**Definition: Regelkreisschnelligkeit**

Die Zeitdauer des Übergangs von einem Beharrungszustand in einen anderen gibt Auskunft über die **Schnelligkeit** des Regelkreises.

**Definition: Toleranzbereich**

Der **Toleranzbereich** ist eine vom Anwender vorgegebene kleine tolerierbare Abweichung um den Sollwert, in dem die Regelgröße während der Beharrung liegen soll.

**Definition: Kreisverstärkung  $V_0$** 

Die **Kreisverstärkung  $V_0$**  gibt die gemeinsame Verstärkung von Regler und Regelstrecke an. Sie berechnet sich zu:

$$V_0 = K_{PR} \cdot K_{PS}$$

**Resultierende Fehlerarten auf Führungs- und Störungssignalen sind:**

| Ordnung | Zeitsignal | Fehlerart                                      |
|---------|------------|------------------------------------------------|
| 1       | $\sim t^0$ | Regelfehler 1. Ordnung: Lagefehler             |
| 2       | $\sim t^1$ | Regelfehler 2. Ordnung: Geschwindigkeitsfehler |
| 3       | $\sim t^2$ | Regelfehler 3. Ordnung: Beschleunigungsfehler  |

**Ausgleichs- und Beharrungsverhalten eines Regelkreises auf Sprungsignalen:**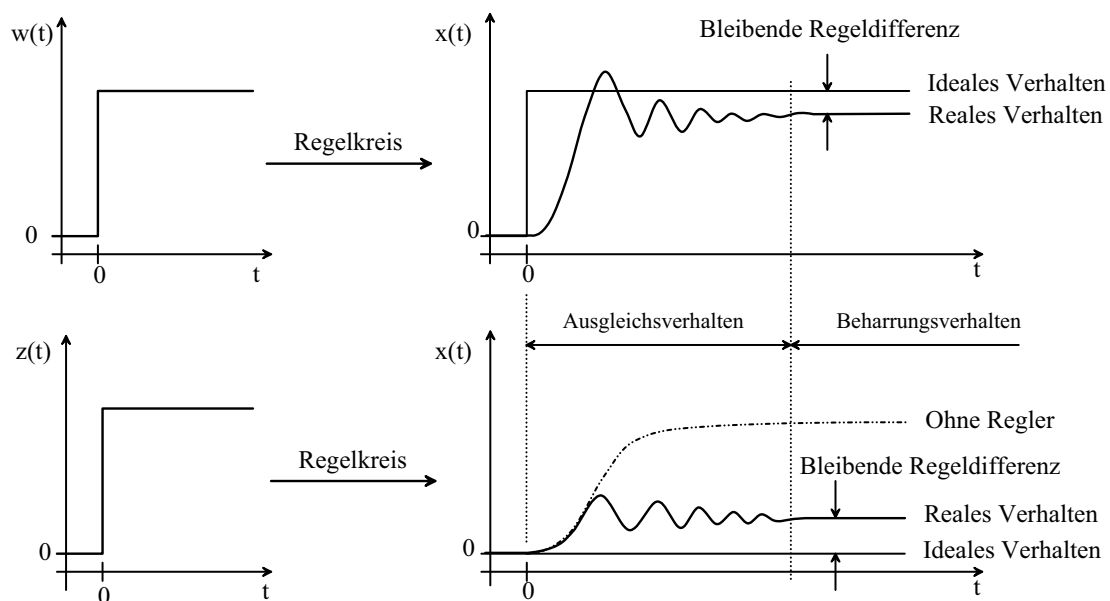

**Bleibende Regeldifferenzen 1. Ordnung für wichtige Regler/Strecken-Kombinationen sind:**

| Strecke | Regler | Bei Führungsvorgabe | Bei Störeinfluss            |
|---------|--------|---------------------|-----------------------------|
| $P-T_n$ | P      | $r \cdot w_0$       | $-r \cdot K_{PS} \cdot z_0$ |
|         | I      | 0                   | 0                           |
|         | PI     | 0                   | 0                           |
|         | PD     | $r \cdot w_0$       | $-r \cdot K_{PS} \cdot z_0$ |
|         | PID    | 0                   | 0                           |
| $I-T_n$ | P      | 0                   | $-\frac{z_0}{K_{PR}}$       |
|         | I      | Strukturinstabil    |                             |
|         | PI     | 0                   | 0                           |
|         | PD     | 0                   | $-\frac{z_0}{K_{PR}}$       |
|         | PID    | 0                   | 0                           |

**Merkmale:**

Der I-Regler regelt die Regelgröße  $x(t)$  von Proportionalstrecken exakt auf die Sollgröße  $w(t)$  ein. Störungen werden vollständig von ihm eliminiert.

I-Regler und I-Regelstrecken funktionieren nicht zusammen. Es stellt sich also kein stationärer Zustand ein. Man spricht in diesem Fall von instabilem Verhalten.

Die Erweiterung eines I-Reglers zum PI-Regler trägt dazu bei, Regelstrecken ohne Ausgleich auch zufriedenstellend regeln zu können.

Der P-Regler regelt Führungsänderungen bei I-Strecken exakt nach; Störungen kann er aber nicht beseitigen.

**Bleibende Regeldifferenzen 2. Ordnung (Geschwindigkeitsfehler) für Basisregler sind:**

| Strecke          | Regler | Bei Führungseinfluss | Als Störeinfluss      |
|------------------|--------|----------------------|-----------------------|
| P-T <sub>n</sub> | P      | $\infty$             | $\infty$              |
|                  | I      | $\frac{w_0}{V_0}$    | $-\frac{z_0}{K_{IR}}$ |
| I-T <sub>n</sub> | P      | $\frac{w_0}{V_0}$    | $\infty$              |
|                  | I      | Nicht definiert      |                       |

**Kenngrößen zur Beurteilung der dynamischen Regelgüte:**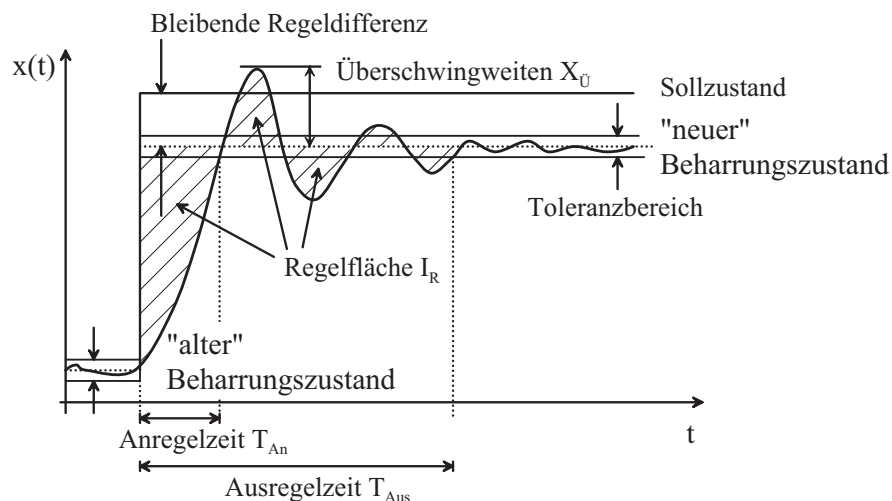**Definition: Anregelzeit**

Die **Anregelzeit**  $T_{An}$  ist die minimale Zeitspanne, welche die Regelgröße  $x(t)$  für einen Übergang benötigt, vom Toleranzbereich des einen Zustands in den anderen zu gelangen, ohne endgültig in diesen einzutauchen..

**Definition: Ausregelzeit**

Die **Ausregelzeit**  $T_{Aus}$  ist die Zeitspanne, welche die Regelgröße  $x(t)$  für den Übergang benötigt, von einem Toleranzbereich eines Beharrungszustands endgültig in den anderen zu verweilen.

**Definition: Überschwingweite**

Die Überschwingweiten  $X_{\bar{U}}$  stellen die Ausschläge der Regelgröße  $x(t)$  über den neu einzunehmenden Beharrungszustand dar.

**Definition: Regelfläche**

Die **Regelfläche**  $I_R$  besteht aus der Summe aller Teilflächen zwischen der Regelgröße  $x(t)$  und dem Beharrungswert  $x(\infty)$  eines Übergangs, die infolge eines Stör- oder Führungssprungs auftreten.

Für reale Regelungen lassen sich Integralkriterien aufstellen, welche zumindest theoretisch zu optimalen Reglern führen.

**Übersicht über Regelgüten für P-T<sub>n</sub>-Strecken:**

| Regler | Anregelzeit | Ausregelzeit | Überschwingweite | Bleibende Regeldifferenz |
|--------|-------------|--------------|------------------|--------------------------|
| P      | mittel      | mittel       | klein            | ja                       |
| I      | groß        | groß         | groß             | nein                     |
| PI     | mittel      | mittel       | mittel           | nein                     |
| PD     | klein       | klein        | klein            | ja                       |
| PID    | klein       | klein        | klein            | nein                     |

**Zusammenhang zwischen Regelgüte und Polstellen von Regelkreisen:**

Charakteristische Gleichung des Regelkreises:  $1 + G_0(s) = 0$

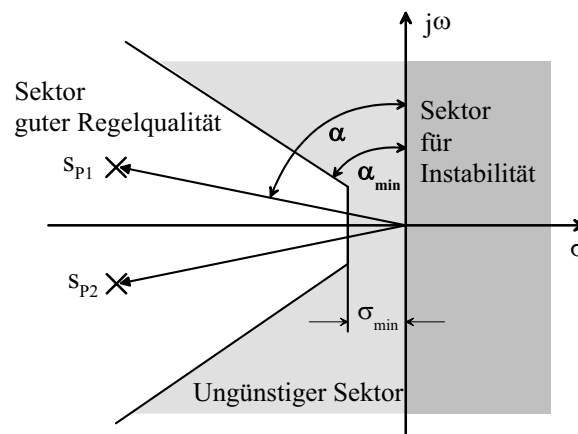**Es gelten die Gütekriterien im Bildbereich:**

Je größer die Länge des Polvektors ist, um so kürzer ist die Anregelzeit.

Je größer der eingeschlossene Winkel  $\alpha$  zwischen Polvektor und Frequenzachse  $j\omega$  ausfällt, desto kürzer ist die Ausregelzeit.

### 3.4 Stabilität von Regelkreisen

Die Gewährleistung der **Stabilität** stellt eine unabdingbare Forderung an jede Regelung dar.

**Definition: Monoinstabilität**

Die **Monoinstabilität** eines Regelkreises lässt die Regelgröße einseitig bis an ihre technischen Systemgrenzen anwachsen und dort verharren.

**Definition: Oszillierende Instabilität**

Bei der **oszillierenden Instabilität** wächst die Schwingungsamplitude der Regelgröße bis zu ihren technischen Begrenzungen an und oszilliert, ohne sich je wieder zu beruhigen.

**Definition: Stabilität eines Regelkreises**

Ein Regelkreis gilt dann als **stabil**, wenn jede beschränkte Eingangsgröße  $w(t)$  bzw.  $z(t)$  zu einer beschränkten Ausgangsgröße  $x(t)$  führt, also gilt:

$$\text{Für alle Zeiten } t \text{ gilt: } |w(t)| < \infty \text{ oder } |z(t)| < \infty \Rightarrow |x(t)| < \infty.$$

**Hauptkriterium: Stabiler Regelkreis**

Der Regelkreis ist genau dann stabil, wenn alle seine Pole, die durch die charakteristische Gleichung bestimmt sind, vollständig im negativ reellen Bildbereich liegen:

$$\operatorname{Re}\{s_{p_k}\} < 0 \quad \text{für alle } k.$$

**Kriterium: Instabiler Regelkreis**

Ein Regelkreis ist genau dann instabil, wenn mindestens ein Pol seiner Übertragungsfunktionen im positiv reellen Bildbereich liegt, oder ein mehrfacher Pol auf der Frequenzachse  $j\omega$  vorkommt:

$$\begin{aligned} &\operatorname{Re}\{s_{p_k}\} > 0 \quad \text{für mindestens ein } k \in \{1, \dots, p\} \\ \text{oder: } &s_{p_k} = s_{p_l} \quad \text{mit } \operatorname{Re}\{s_{p_k}\} = \operatorname{Re}\{s_{p_l}\} = 0 \text{ und } j \neq k \in \{1, \dots, p\}. \end{aligned}$$

**Kriterium: Grenzstabiler Regelkreis**

Der Regelkreis ist genau dann grenzstabil, wenn kein Pol seiner Übertragungsfunktion im positiv reellen Bildbereich liegt und keine mehrfachen Pole auf der Imaginärachse auftreten, aber auf dieser mindestens eine einfache Polstelle vorhanden ist.

**Definition: Charakteristische Gleichung des Regelkreises**

Die **charakteristische Gleichung** legt die Eigendynamik des Regelkreises fest; sie lautet:

$$1 + G_0(s) = 1 + G_R(s) \cdot G_S(s) = 1 + \frac{Z_0(s)}{N_0(s)} = 0.$$

**Übertragungsmatrix des Regelkreises:**

$$\mathbf{G}_{\text{Regelkreis}} := \begin{pmatrix} G_W(s) & G_Z(s) \\ G_{WY}(s) & G_{ZY}(s) \end{pmatrix} = \begin{pmatrix} \frac{G_0(s)}{1 + G_0(s)} & \frac{G_S(s)}{1 + G_0(s)} \\ \frac{G_R(s)}{1 + G_0(s)} & \frac{-G_0(s)}{1 + G_0(s)} \end{pmatrix}$$

**Berechnung aller Regelkreis-Signale:**

$$\begin{pmatrix} X(s) \\ Y(s) \end{pmatrix} = \mathbf{G}_{\text{Regelkreis}} \begin{pmatrix} W(s) \\ Z(s) \end{pmatrix}.$$

**Kriterium: Innere Stabilität des Regelkreises (I-Stabilität)**

Der Regelkreis ist genau dann I-stabil, wenn alle Übertragungsfunktionen der Regelkreis-Übertragungsmatrix nur Pole im negativ reellen Bildbereich besitzen.

$$\operatorname{Re}\{s_{p_k}\} < 0 \quad \text{für alle } k \text{ von } \mathbf{G}_{\text{Regelkreis}}.$$

Die I-Stabilität stellt ein universelles Stabilitätskriterium dar. Seine Verwendung vervielfacht den Rechenaufwand gegenüber der Bestimmung der Wurzeln der charakteristischen Gleichung erheblich. Deshalb hält man sich an die Richtlinie:

Bei Beachtung des Kürzungsverbots identischer Pol- und Nullstellen bei der Berechnung der charakteristischen Regelkreis-Gleichung können jederzeit das Hauptkriterium der Stabilität angewendet werden.

**Absolute Stabilität:** Aussage, ob ein Regelkreis stabiles oder instabiles Verhalten aufweist.

**Relative Stabilität:** Gibt an, wie ausreichend stabil ein Regelkreis sich verhält.

Charakteristisches Polynom des Regelkreises:

$$P_{RK}(s) = N_0(s) + Z_0(s) = a_0 + a_1 \cdot s^1 + a_2 \cdot s^2 + \dots + a_n \cdot s^n.$$

**Algebraische Stabilitätskriterien:** Mathematische Analyse der charakteristischen Polynome von Regelkreisen zur Stabilitätsbeurteilung.

**Hurwitz-Matrix** des Regelkreises mit ihren Hurwitz-Determinanten:

$$\mathbf{H} = \begin{pmatrix} \boxed{a_1} & a_3 & a_5 & a_7 & \dots \\ a_0 & \boxed{a_2} & a_4 & a_6 & \dots \\ 0 & a_1 & \boxed{a_3} & a_5 & \dots \\ 0 & a_0 & a_2 & \boxed{a_4} & \dots \\ \dots & \dots & \dots & \dots & \dots \end{pmatrix}.$$

### Hurwitz-Kriterium

Der Regelkreis ist genau dann asymptotisch stabil, wenn sein charakteristisches Polynom n-ter Ordnung folgende Hurwitz-Bedingungen erfüllt:

1. Alle Koeffizienten  $a_i$  ( $1 \leq i \leq n$ ) müssen ungleich Null sein und gleiches Vorzeichen besitzen.
2. Die Hurwitz-Determinanten  $D_i$  ( $1 \leq i \leq n$ ) müssen alle einen Wert größer Null aufweisen.

### Routh-Schema eines Regelkreises

| Zeile    | 1. Spalte                                             |                                                                                                                                     |
|----------|-------------------------------------------------------|-------------------------------------------------------------------------------------------------------------------------------------|
| 0        | $a_n$                                                 | $a_{n-2} \quad a_{n-4} \quad \dots \quad a_1/a_0 \quad 0$                                                                           |
| 1        | $a_{n-1}$                                             | $a_{n-3} \quad a_{n-5} \quad \dots \quad a_0/0 \quad 0$                                                                             |
| 2        | $b_{n-1} = a_{n-2} - \frac{a_n}{a_{n-1}} a_{n-3}$     | $b_{n-2} = a_{n-4} - \frac{a_n}{a_{n-1}} a_{n-5} \quad b_{n-3} = a_{n-6} - \frac{a_n}{a_{n-1}} a_{n-7} \quad \dots \quad 0$         |
| 3        | $c_{n-1} = a_{n-3} - \frac{a_{n-1}}{b_{n-1}} b_{n-2}$ | $c_{n-2} = a_{n-5} - \frac{a_{n-1}}{b_{n-1}} b_{n-3} \quad c_{n-3} = a_{n-7} - \frac{a_{n-1}}{b_{n-1}} b_{n-4} \quad \dots \quad 0$ |
| $\vdots$ | $\vdots$                                              | $\vdots$                                                                                                                            |
| $n-3$    | $w_{n-1} = \dots$                                     | $w_{n-2} = \dots \quad 0$                                                                                                           |
| $n-2$    | $x_{n-1} = \dots$                                     | $x_{n-2} = \dots$                                                                                                                   |
| $n-1$    | $y_{n-1} = w_{n-2} - \frac{w_{n-1}}{x_{n-1}} x_{n-2}$ | 0                                                                                                                                   |
| $n$      | $z_{n-1} = x_{n-1}$                                   | 0                                                                                                                                   |

### Routh-Kriterium

Der Regelkreis ist genau dann asymptotisch stabil, wenn sein charakteristisches Polynom n-ter Ordnung folgende Routh-Bedingungen erfüllt:

1. Alle Koeffizienten  $a_i$  ( $1 \leq i \leq n$ ) müssen ungleich Null sein und ein positives Vorzeichen besitzen. (Falls alle Koeffizienten ungleich Null und negatives Vorzeichen besitzen, erfüllen sie die Bedingung trotzdem. Durch Multiplikation mit  $-1$  erhält man die gewünschte Vorzeichenumkehr.)
2. Alle Koeffizienten der 1. Spalte im Routh-Schema müssen größer als Null sein.

## Graphische Stabilitätsuntersuchungen

Günstiger Pollagenbereich für Polstellen des Regelkreises:

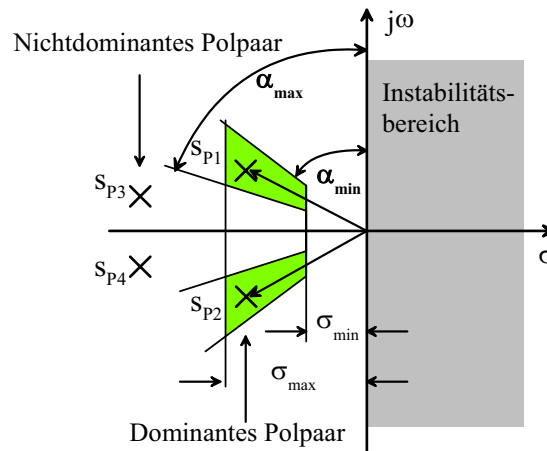

Reglerfunktion:  $G_R(s) = K_R \cdot \hat{G}_R(s)$

### Definition: Wurzelortskurve (WOK)

Die **Wurzelortskurve** ist der geometrische Ort aller Lösungen der charakteristischen Gleichung des Regelkreises  $P_{RK}(s) = 1 + G_0(s) = 0$  in der Bildebene, wobei die Reglerverstärkung  $K_R$  im Bereich  $0 \leq K_R \leq \infty$  variiert.

Wichtigste Eigenschaften der WOK:

- Hält sich die WOK im negativ reellen Bildbereich auf, liegt ein stabiler Regelkreis vor.
- Der Übergang der WOK vom negativ reellen in den positiv reellen Bildbereich markiert den kritischen Verstärkungsfaktoren  $K_{R, \text{kritisch}}$  des Reglers.
- Die Pole des Regelkreises wandern in Abhängigkeit des Verstärkungsfaktors  $K_R$  auf Kurven, die für  $K_R = 0$  in den Polstellen ( $\times$ -Zeichen) des offenen Regelkreises beginnen und für  $K_R \rightarrow \infty$  in dessen Nullstellen ( $\circ$ -Zeichen) bzw. im Unendlichen enden. Bei der Anzahl von  $N$  Nullstellen und  $P$  Polstellen enden  $(P-N)$  Kurven im Unendlichen. Die Polstellen des offenen Regelkreises wirken als Quellen, dessen Nullstellen als Senken.
- Die WOK zeigt sich immer symmetrisch zur reellen  $\sigma$ -Achse.

Typische Wurzelortskurven sind:

| Pole | Keine Nullstelle | Eine Nullstelle |
|------|------------------|-----------------|
| 1    |                  |                 |
| 2    |                  |                 |

| Pole | Keine Nullstelle                                                                  | Eine Nullstelle                                                                    |
|------|-----------------------------------------------------------------------------------|------------------------------------------------------------------------------------|
| 3    | 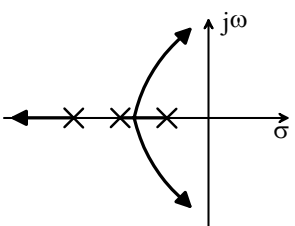 |  |

### Experimentelle Stabilitätsuntersuchungen:

Interne Bedingungen der Regelkreis-Stabilität:

Der offene Regelkreis darf zwischen Eingangssignal Regler und Ausgangssignal Strecke keine Phasenverschiebung um  $\varphi = -180^\circ$  und keine Kreisverstärkung  $V_0 \geq 1$  gleichzeitig aufweisen!

Wie kann diese Forderung überprüft werden?

### Definition: Kritischer Punkt $P_{\text{krit}}$

Der Punkt  $P_{\text{krit}} = (-1, j \cdot 0)$  im Nyquist-Diagramm wird als **kritischer Punkt** bezeichnet.

### Einfaches Nyquist-Kriterium

Der geschlossene Regelkreis ist genau dann stabil, wenn die Ortskurve  $FG_0(j\omega)$  des offenen Regelkreises mit anwachsender Frequenz den kritischen Punkt  $P_{\text{krit}}$  links liegen lässt, d. h. ihn weder umschließt noch schneidet.

Zur Vervollständigung des Kriteriums werden zwei Voraussetzungen nachgetragen:

1. Der offene Regelkreis  $G_0(s)$  muss E/A-stabiles Verhalten zeigen, d. h. keine Polstellen im instabilen Bildbereich besitzen.
2. Die Übertragungsfunktion  $G_0(s)$  darf maximal eine Doppelpolstelle im Ursprung besitzen. Dadurch ist die Anzahl der Integrierglieder im offenen Regelkreis auf zwei beschränkt.

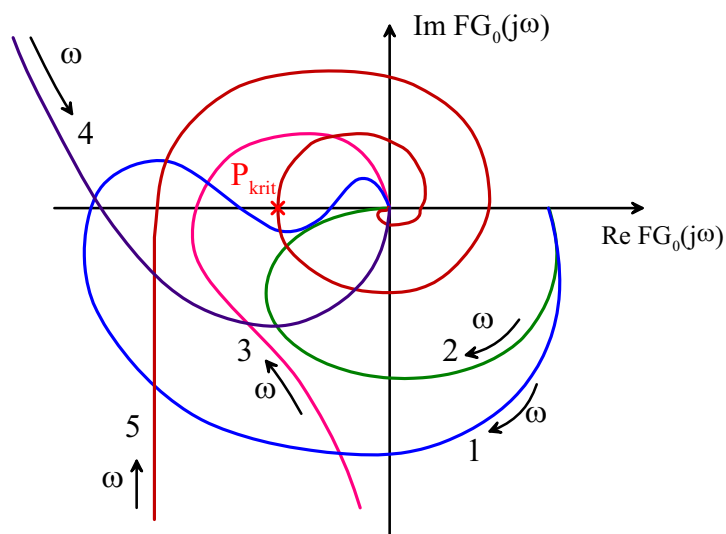

#### Legende:

- 1: Stabil
- 2: Stabil
- 3: Instabil
- 4: Stabil
- 5: Grenzstabil



**Allgemeines Nyquist-Kriterium**

Besitzt der offene Regelkreis  $G_0(s)$   $N_+$  Polstellen im positiv reellen Bildbereich und  $N_l$  Pole auf der Imaginärachse der  $s$ -Ebene, dann gilt:

Der geschlossene Regelkreis ist genau dann stabil, wenn die graphisch ermittelte Winkeländerung  $\Delta\varphi$  des Fahrstrahls vom kritischen Punkt  $P_{\text{krit}}$  zur Ortskurve des offenen Regelkreises  $FG_0(j\omega)$  im Frequenzbereich ( $0 \leq \omega < \infty$ ) die Bedingung

$$\Delta\varphi(\omega = 0 \rightarrow \infty) = N_+ \cdot \pi + N_l \cdot \frac{\pi}{2}$$

erfüllt.

**Definition: Amplitudenrand (Amplitudenreserve)**

Der **Amplitudenrand**  $A_R$  gibt den Faktor an, mit dem die Ortskurve  $FG_0(j\omega)$  des aufgeschnittenen Regelkreises multipliziert werden muss, um durch den kritischen Punkt  $P_{\text{krit}}$  zu verlaufen. Er berechnet sich aus dem Frequenzgang  $FG_0(j\omega)$  an der Stelle  $\varphi(\omega\pi) = -180^\circ$  zu:

$$A_R = \frac{1}{|FG_0(j\omega_\pi)|} \Big|_{\varphi(\omega)=-180^\circ}$$

**Definition: Phasenrand (Phasenreserve)**

Der **Phasenrand**  $\phi_R$  spiegelt den Winkel wider, um den die Ortskurve des aufgeschnittenen Regelkreises gedreht werden muss, dass sie durch den kritischen Punkt  $P_{\text{krit}}$  verläuft. Er berechnet sich zu:

$$\phi_R = \varphi(\omega_D) \Big|_{|FG_0(\omega)|=1} - 180^\circ.$$

**Definition: Phasenschnittfrequenz  $\omega_\pi$** 

Der Frequenzgang  $FG_0(j\omega)$  nimmt bei der **Phasenschnittfrequenz  $\omega_\pi$**  die Phasendrehung  $\varphi(\omega_\pi) = -180^\circ$  an:

$$\angle FG_0(\omega_D) = 180^\circ.$$

**Definition: Durchtrittsfrequenz  $\omega_D$** 

Die Ortskurve schneidet den Einheitskreis im Koordinatenursprung bei der **Durchtrittsfrequenz  $\omega_D$** :

$$|FG_0(\omega_D)| = 1.$$

**Kriterium 1**

Fällt der Frequenzgang  $FG_0(j\omega)$  des offenen Regelkreises für alle Frequenzen kleiner als eins aus, so ist der geschlossene Regelkreis strukturstabil.

**Kriterium 2**

Bleibt die Phase des aufgeschnittenen Regelkreises betragsmäßig kleiner als  $-180^\circ$ , so ist der geschlossene Regelkreis a priori stabil.

**Kriterium 3**

Ein Regelkreis weist i. a. einen gedämpften und schnellen Regelverlauf auf, also eine ausreichende Regelungsstabilität, wenn für seine Stabilitätsgröße gilt:

| Führungsverhalten              | Störverhalten       |
|--------------------------------|---------------------|
| $A_R > 4$                      | $A_R > 2-3$         |
| $\phi_R > 50^\circ - 60^\circ$ | $\phi_R > 50^\circ$ |

### 3.5 Regelkreisentwurf

Der Regelkreisentwurf besteht aus den Aufgaben:

- Festlegung der Regelkreisstruktur
- Reglerauswahl
- Einstellung der Reglerparameter.

Die nachfolgende Tabelle stellt eine Vorauswahl geeigneter Kombinationen von Reglern und Regelstrecken zusammen:

*Reglerauswahl für Streckentypen*

| Regler | P-T <sub>n</sub><br>(aperiodisch)           | P-T <sub>n</sub><br>(schwingend)            | I-T <sub>n</sub>                | T <sub>t</sub>                              |
|--------|---------------------------------------------|---------------------------------------------|---------------------------------|---------------------------------------------|
| P      | -                                           | -                                           | Ausreichendes Führungsverhalten | -                                           |
| I      | -                                           | -                                           | <b>Instabil</b>                 | Eingeschränktes Führungs- und Störverhalten |
| PI     | Eingeschränktes Führungs- und Störverhalten | Eingeschränktes Führungs- und Störverhalten | Ausreichendes Störverhalten     | Gutes Führungs- und Störverhalten           |
| PD     | -                                           | -                                           | Gutes Führungsverhalten         | -                                           |
| PID    | Gutes Führungs- und Störverhalten           | Gutes Führungs- und Störverhalten           | Gutes Störverhalten             | -                                           |

Empirische Einstellregeln wurden anhand ausgedehnter Untersuchungen von Reglereinstellungen für stabile Regelstrecken aufgestellt. Sie dienen zum Vor-Ort-Einstellen von Regelkreisen, ohne deren genaue Regelstreckenmodelle zu kennen.

#### Verfahren: Empirische Einstellregeln nach Ziegler-Nichols

Ziegler und Nichols schlagen Einstellwerte für die Kennwerte  $K_{PR}$ ,  $T_N$  und  $T_V$  der Standardregler vor, die aus den Übergangsfunktionen der Regelstrecken mit Ausgleich resultieren. Diese werden durch P-T<sub>1</sub>-T<sub>t</sub>-Verhalten angenähert und durch die Ersatzwerte Totzeit  $T_t$  und Verzögerungszeit  $T_1$  beschrieben.

Die empirischen Reglereinstellungen lauten für P-, PI- und PID-Regler:

*Reglereinstellungen nach Ziegler-Nichols (bekannte Regelstreckenparameter)*

| Regler | $K_{PR}$                                 | $T_N$           | $T_V$           |
|--------|------------------------------------------|-----------------|-----------------|
| P      | $\frac{T_1}{K_{PS} \cdot T_t}$           | -               | -               |
| PI     | $0,9 \cdot \frac{T_1}{K_{PS} \cdot T_t}$ | $3,3 \cdot T_t$ | -               |
| PID    | $1,2 \cdot \frac{T_1}{K_{PS} \cdot T_t}$ | $2,0 \cdot T_t$ | $0,5 \cdot T_t$ |

Liegen von der Regelstrecke keine Kenngrößen vor, kann die Regelstrecke eventuell mit einem einfachen P-Regler notdürftig betrieben werden. Dabei achtet man darauf, dass zu Beginn die Reglerverstärkung  $K_{PR}$  minimale Werte annimmt, um den Regelkreis nicht instabil werden zu lassen.

Nun erhöht man langsam die Reglerverstärkung  $K_{PR}$  genau bis zu dem Wert, bei dem der Regelkreis eine Dauerschwingung nach einer Sollwertänderung ausführt. Der eingestellte Verstärkungsfaktor  $K_{PR\text{-kritisch}}$  und die Periodendauer der Schwingung  $T_{\text{kritisch}}$  dienen dann dazu, die optimalen Reglerparameter nach folgender Tabelle zu gewinnen:

*Reglereinstellungen nach Ziegler-Nichols (unbekannte Regelstreckenparameter)*

| Regler | $K_{PR}$                            | $T_N$                            | $T_V$                             |
|--------|-------------------------------------|----------------------------------|-----------------------------------|
| P      | $0,50 \cdot K_{PR\text{-kritisch}}$ | -                                | -                                 |
| PI     | $0,45 \cdot K_{PR\text{-kritisch}}$ | $0,83 \cdot T_{\text{kritisch}}$ | -                                 |
| PID    | $0,60 \cdot K_{PR\text{-kritisch}}$ | $0,50 \cdot T_{\text{kritisch}}$ | $0,125 \cdot T_{\text{kritisch}}$ |

### Verfahren: Empirische Einstellregeln nach Chien-Hrones-Reswick

Bei diesen Einstellregeln dienen die Ersatzwerte Verzugszeit  $T_u$  und Ausgleichszeit  $T_g$  als Kennwerte der Regelstrecke. Das Verfahren empfiehlt eine Vielzahl von Parametereinstellungen für die Standardregler, die den jeweiligen Regelungsanforderungen besser gerecht werden.

*Einstellregeln nach Chien-Hrones-Reswick*

|         | Regler | Aperiodisches Übergangsverhalten          |                 |                  | Schwingendes Übergangsverhalten (bei 20% Überschwingweite) |                  |                  |
|---------|--------|-------------------------------------------|-----------------|------------------|------------------------------------------------------------|------------------|------------------|
|         |        | $K_{PR}$                                  | $T_N$           | $T_V$            | $K_{PR}$                                                   | $T_N$            | $T_V$            |
| Führung | P      | $0,3 \cdot \frac{T_g}{K_{PS} \cdot T_u}$  | -               | -                | $0,7 \cdot \frac{T_g}{K_{PS} \cdot T_u}$                   | -                | -                |
|         | PI     | $0,35 \cdot \frac{T_g}{K_{PS} \cdot T_u}$ | $1,2 \cdot T_g$ | -                | $0,6 \cdot \frac{T_g}{K_{PS} \cdot T_u}$                   | $T_g$            | -                |
|         | PID    | $0,6 \cdot \frac{T_g}{K_{PS} \cdot T_u}$  | $T_g$           | $0,5 \cdot T_u$  | $0,95 \cdot \frac{T_g}{K_{PS} \cdot T_u}$                  | $1,35 \cdot T_g$ | $0,47 \cdot T_u$ |
| Störung | P      | $0,3 \cdot \frac{T_g}{K_{PS} \cdot T_u}$  | -               | -                | $0,7 \cdot \frac{T_g}{K_{PS} \cdot T_u}$                   | -                | -                |
|         | PI     | $0,6 \cdot \frac{T_g}{K_{PS} \cdot T_u}$  | $4 \cdot T_u$   | -                | $0,7 \cdot \frac{T_g}{K_{PS} \cdot T_u}$                   | $2,3 \cdot T_u$  | -                |
|         | PID    | $0,95 \cdot \frac{T_g}{K_{PS} \cdot T_u}$ | $2,4 \cdot T_u$ | $0,42 \cdot T_u$ | $1,2 \cdot \frac{T_g}{K_{PS} \cdot T_u}$                   | $2 \cdot T_u$    | $0,42 \cdot T_u$ |

### Verfahren: Parameteroptimierung

Anhand eines Gütemaßes der Form

$$I_{R,f} = \int_0^{\infty} f\{x(t) - x(\infty)\} dt$$

optimiert man die Reglerparameter durch Minimierung von  $I_{R,f}$ .

Als Gütefunktionen  $f\{\dots\}$  verwendet man:

$$\begin{aligned}
 \text{Lineare Regelfläche} \quad I_{R,\text{Linear}} &= \int_0^{\infty} x_d(t) dt, \\
 \text{Betragsregelfläche} \quad I_{R,\text{Betrag}} &= \int_0^{\infty} |x_d(t)| dt, \\
 \text{Quadratische Regelfläche} \quad I_{R,\text{Quadrat}} &= \int_0^{\infty} \{x_d(t)\}^2 dt.
 \end{aligned}$$

Will man langanhaltende Regeldifferenzen stärker bewerten, multipliziert man die Gütefunktionen  $f\{\dots\}$  mit der Zeit.

### Verfahren: Dynamische Kompensation

Die Entwurfsmethode der dynamischen Kompensation versucht, Verzögerungen der Regelstrecke durch entsprechende Reglerterme zu kompensieren. Jeder Verzögerungsordnung der Regelstrecke entspricht eine Polstelle in der Streckenübertragungsfunktion. Verwendet man einen Regler mit entsprechenden Nullstellen, so lassen sich die Verzögerungsterme der Strecke kompensieren. Dazu eignet sich natürlich diejenige Polstelle am besten, die für die größte Verzögerung verantwortlich zeichnet.

Am Beispiel eines PI-Reglers, angewandt auf eine mehrfach verzögerte Regelstrecke, berechnet sich die Übertragungsfunktion des offenen Regelkreises:

$$G_0(s) = \frac{K_{PS} \cdot ZP(s)}{(1+s \cdot T_1) \cdots (1+s \cdot T_i) \cdots (1+s \cdot T_n)} \cdot \frac{K_{PR} \cdot (1+s \cdot T_N)}{s \cdot T_N} \quad \text{mit: } T_i = T_N$$

Die stark verzögernde Wirkung der Regelstrecke wird durch einen schnellen PD-Regleranteil kompensiert.

**Voraussetzung für dieses Verfahren ist aber, dass die Pol-Nullstellen-Kompensation nur für "stabile" Pole der Streckenübertragungsfunktion anwendbar ist, d. h. nur für  $(1+s \cdot T_i)$ -Terme mit Verzögerungszeiten  $T_i > 0$ .**

### Verfahren: Synthese im Bildbereich mit WOK

Das WOK-Entwurfsverfahren versucht Null- und Polstellen von Reglern so im Bildbereich zu platzieren, dass die resultierenden Wurzelortskurven für eine gegebene Regelstrecke einen stabilen Regelkreis anzeigen. Der "dominante" WOK-Ast wird so festgelegt, dass er durch einen vorgegebenen Bildsektor verläuft, der die Regelungsanforderungen erfüllt.

**Das WOK-Entwurfsverfahren lässt sich in folgenden Regeln allgemein zusammenfassen:**

1. Ausgangspunkt der Regelkreissynthese ist das PN-Schema der Regelstrecke.
2. Die qualitativen Lagen der Wurzelortskurven des Regelkreises werden nun durch Vorgabe von Pol- und Nullstellen des Reglers festgelegt:

$$G_R(s) = K_R \cdot \hat{G}_R(s) = K_R \cdot \frac{(s-s_{N_1}) \cdots (s-s_{N_m})}{(s-s_{P_1}) \cdots (s-s_{P_n})}$$

wobei man die Strukturbilder typischer Wurzelortskurven berücksichtigt. Die Pol- und Nullstellen des Reglers bestimmen die Dynamik und Stabilität des Regelkreises. Dabei lassen sich zwei grobe Feststellungen treffen:

- a) Das Hinzufügen einer Polstelle  $s_{P_i}$  verursacht eine Verbiegung der WOK nach rechts, was zu einer Verlangsamung und Destabilisierung des Regelkreises führt.
- b) Fügt man eine Nullstelle  $s_{N_i}$  in die Regler-Übertragungsfunktion ein, erreicht man ein Verbiegen der WOK nach links. Der Regelkreis wird dadurch stabiler und reagiert auch schneller.

Die technische Realisierung der Regler ist natürlich im Auge zu behalten. Dies drückt sich in der Übertragungsfunktion dadurch aus, **dass die Zahl der Nullstellen i. a. die Zahl der Polstellen nicht übersteigen darf.**

3. Nachdem die qualitative Reglerstruktur gefunden ist, werden seine Pol- und Nullstellen so platziert, dass der dominante WOK-Ast durch den gewünschten Bildsektor verläuft. Für dieses Gebiet bestimmt man den notwendigen Reglerverstärkungsfaktor  $K_R$ .

Typische Wurzelortskurven

| Pole | Keine Nullstelle                                                                   | Eine Nullstelle                                                                     |
|------|------------------------------------------------------------------------------------|-------------------------------------------------------------------------------------|
| 1    | 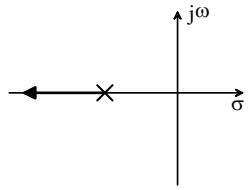  |   |
| 2    |   |   |
| 3    |  |  |

4. Nun überprüft man die Lagen der übrigen Polstellen für den gefundenen Verstärkungsfaktor  $K_R$ . Sie sollten einen vernachlässigbaren Einfluss besitzen. Durch die rechnergestützte Simulation des Regelkreises überprüft man abschließend die Regelkreisdynamik.

Stellt sich kein befriedigendes Ergebnis ein, durchläuft man die Entwurfsschritte ein weiteres Mal.

### Verfahren: Synthese im Frequenzbereich

Durch Vorgabe der Frequenzkennlinien  $FG_0(j\omega)$  für den offenen Regelkreis lässt sich der Frequenzgang des Reglers bestimmen. Dazu müssen allerdings die Frequenzkennlinien der Regelstrecke vorhanden sein.

Für den Entwurf des Reglers im Frequenzbereich geht man nun so vor:

- Nachdem das gewünschte Übertragungsverhalten des geschlossenen Regelkreises vorgegeben ist, bestimmt man daraus den Frequenzgang  $FG_0(j\omega)$  des offenen Kreises und zeichnet dazu die Frequenzkennlinien im Bode-Diagramm.
- Anschließend trägt man die Frequenzkennlinie  $FG_S(j\omega)$  der Regelstrecke in dasselbe Diagramm ein.
- Wegen der multiplikativen Zusammensetzung des offenen Frequenzgangs  $FG_0(j\omega)$  aus den Regler- und Streckenfrequenzkennlinien bestimmt sich der Reglerfrequenzgang als Differenz zwischen  $FG_0(j\omega)$  und  $FG_S(j\omega)$  im Bode-Diagramm:

$$\lg \{FG_R(j\omega)\} = \lg \{FG_0(j\omega)\} - \lg \{FG_S(j\omega)\}.$$

Der angestrebte Frequenzgang  $FG_R(j\omega)$  des Reglers kann also graphisch gewonnen und mit Frequenzkennlinien wichtiger Regler und Korrekturglieder verglichen werden (siehe obige Tabelle). Eine Feinabstimmung der Reglerkennwerte erlaubt eine weitgehende Annäherung an den geforderten Frequenzgang  $FG_0(j\omega)$  des offenen Regelkreises.

*Frequenzkennlinien wichtiger Regler*

| Regler             | Bode-Diagramm                                                                        |  |
|--------------------|--------------------------------------------------------------------------------------|--|
| PI                 | 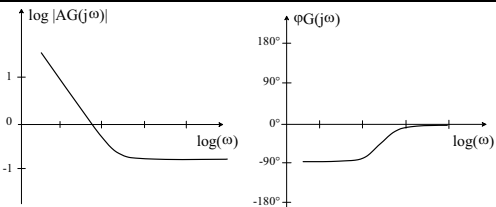   |  |
| PD                 |    |  |
| PID                |   |  |
| PID-T <sub>1</sub> |  |  |
| Lead               |  |  |
| Lag                |  |  |

Durch Erweiterung der Struktur von Regelkreisen lassen sich die Möglichkeiten, das Regelkreisverhalten den Regelanforderungen besser anzupassen, wesentlich steigern. Im folgenden werden solche Erweiterungen des einschleifigen Regelkreises vorgestellt, die insbesondere schneller auf Störungen reagieren sollen. Es entstehen Regelstrukturen mit weiteren Rückkopplungsschleifen.

### Erweiterung mit: Störaufschaltung

Bei manchen Regelungen lässt sich die Störung direkt messen. Dazu muss eine (oder mehrere) ausgeprägte Störgröße identifizierbar sein, mit der sich der Einfluss auf die Regelgröße teilweise kompensieren bzw. ganz reduzieren lässt.

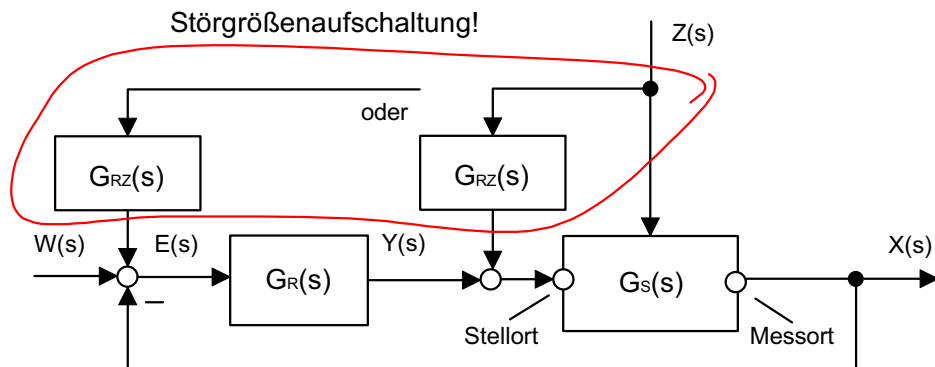

### Erweiterung mit: Hilfsgrößenaufschaltung

Nicht alle Störgrößen auf Regelstrecken können direkt gemessen werden. Man muss sich dann auf deren Auswirkungen innerhalb der Regelstrecke beschränken. Um deren verzögernde Wirkungen auf die Regelgröße nicht abwarten zu müssen, sucht man nach einer Hilfsgröße innerhalb der Strecke, die sehr schnell auf die Störungen reagiert. Diese koppelt man zurück, um die Regelstrecke von diesen Störungen zu entlasten.

Der Vorteil dieser Wirkungsstruktur ist, dass auch hier die Verzögerung der Störung durch die gesamte Regelstrecke umgangen und direkt bzw. indirekt die Störauswirkung über die Hilfsgröße durch Einwirken auf die Regelstrecke kompensiert wird.

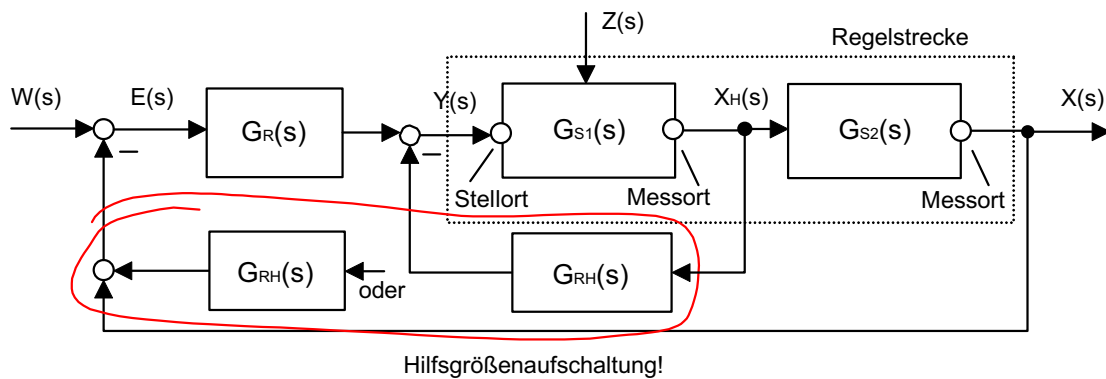

### Erweiterung: Kaskadenregelung

Eine verallgemeinerte Erweiterung des Regelkreises mit Hilfsgrößenaufschaltung führt auf den Kaskadenregelkreis. Er verkörpert eine Verschachtelung von jeweils einschleifigen Regelkreisen ineinander.

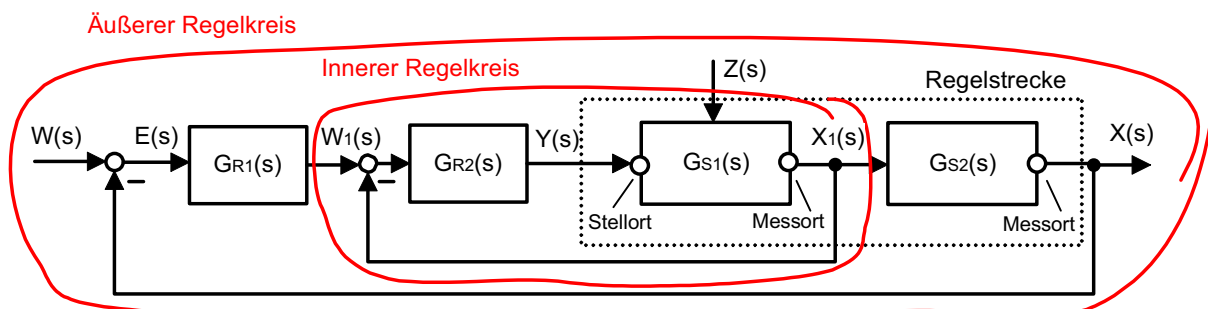

Allgemein können natürlich  $n$  Regelkreise hierarchisch ineinander verschachtelt werden. Dazu ist Bedingung, dass  $n$  innere Regelstreckengrößen zur Verfügung stehen und auch messtechnisch erfassbar sind.

Beim Regelkreisentwurf geht man am geeignetsten nach folgenden Prinzipien vor:

- Jeder Regelkreis wird für sich *nach den jeweiligen Anforderungen* von innen nach außen konzipiert.
- Jeder Regelkreis soll ohne das Zutun der äußeren Regler für sich stabil sein.
- Es ist sehr zweckmäßig, dass jeder innere Regelkreis schneller als der nächste äußere reagiert.

### Erweiterung mit: Vorsteuerung

Eine andere Möglichkeit, das Regelkreisverhalten prinzipiell zu verbessern, besteht durch die Verwendung einer Vorsteuerung.

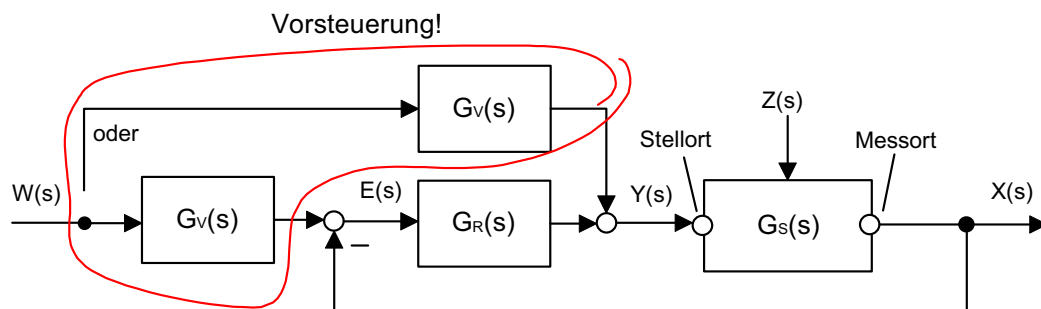

Mit der Vorsteuerung kann man erreichen, dass der Regelkreis ein "gutes" Stör- und Führungsverhalten bekommt.



# 4 Steuerungstechnik

Komplexe und umfangreiche Maschinenanlagen zur Fertigung verschiedenster Produkte verlangen nach immer anspruchsvolleren Steuerungen. Dazu sind umfangreiche Mess-, Steuerungs- und Stelleinrichtungen erforderlich. Um diese Einrichtungen entwickeln, bedienen und warten zu können, sind grundlegende Kenntnisse der Steuerungstechnik notwendig.

## 4.1 Grundbegriffe der Steuerungstechnik

Der Begriff Steuern bzw. Steuerung werden in der Automatisierungstechnik in einem engen und einem weiten Sinn verwendet. Allgemein bedeutet Steuern, einen Massenstrom bzw. Energiefluss durch Signale auf definierte Weise zu beeinflussen. Die Grundbegriffe und Definitionen der Steuerungstechnik beschreiben diese Einflussnahme:

### Definition: Steuerung (DIN 19226)

Das Steuern - die Steuerung - ist der Vorgang in einem System, bei dem eine oder mehrere Größen als Eingangsgrößen, andere Größen als Ausgangsgrößen auf Grund der dem System eigentümlichen Gesetzmäßigkeit beeinflussen. Kennzeichen für das Steuern ist der offene Wirkungsweg **oder ein geschlossener Wirkungsweg, bei dem durch die Eingangsgrößen beeinflusste Ausgangsgrößen nicht fortlaufend und nicht wieder über dieselben Eingangsgrößen auf sich selbst wirken.**

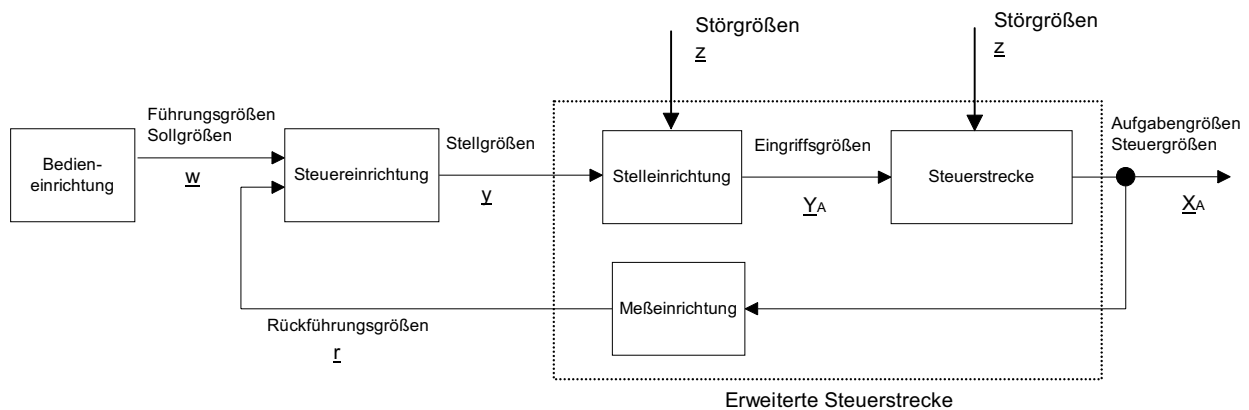

### Definition: Steuerstrecke (DIN 19226)

Die **Steuerstrecke** ist derjenige Teil des Wirkungsweges, welcher den aufgabengemäß zu beeinflussenden Bereich der Anlage darstellt.

### Definition: Steuereinrichtung (DIN 19226)

Die **Steuereinrichtung** ist derjenige Teil des Wirkungsweges, welcher die aufgabengemäße Beeinflussung der Strecke über die Stelleinrichtung bewirkt.

**Definition: Stelleinrichtung**

Die **Stelleinrichtung** wirkt unmittelbar auf die Steuerstrecke ein. In aller Regel setzt sie sich aus Stellgliedern und Stellantrieb zusammen.

**Definition: Sollgröße, Führungsgröße**

Die **Soll- bzw. Führungsgrößen  $w$**  sind die Vorgabegrößen für die gesamte Steuerung. Sie werden von außen der Steuereinrichtung als Eingangsgrößen zugeführt. Die Steuerung generiert aus ihnen die Eingriffsinformationen auf die Steuerstrecke.

**Definition: Stellgröße, Eingriffsgröße**

Die **Stellgrößen  $y$**  sind die Ausgangsgrößen der Steuereinrichtung. Sie dienen der Stelleinrichtung als Eingangssignal. Die Stelleinrichtung generiert aus ihnen die notwendigen Eingriffsgrößen  $Y_A$  auf die Steuerstrecke.

**Definition: Steuergröße, Aufgabengröße**

Die **Aufgabengrößen  $X_A$**  bzw. die **Steuergrößen  $x$**  sind die Ausgangsgrößen der Steuerstrecke. Die Steuerung hat die Aufgabe, diese Größen nach der vorgegebenen Steuerinformation einzustellen.

**Definition: Rückführungsgröße**

**Rückführgrößen  $r$**  werden der Steuereinrichtung zur Überwachung der Steuerstrecke bereit gestellt, ohne dass ein ständiger Vergleich mit den Führungsgrößen der Strecke vorgenommen wird. Sie werden aus der Menge der Ausgangsgrößen der Steuerstrecke entnommen.

**Definition: Störgröße**

**Störgrößen** sind von außen auf die Steuerung wirkende Größen, welche die beabsichtigte Wirkung der Steuerung beeinträchtigen. Sie beeinflussen die Funktionen einer Anlage auf unerwünschte Weise.

## 4.2 Steuerungsarten

Für die Automatisierung von Maschinen und Anlagen unterscheidet man folgende Steuerungsarten:

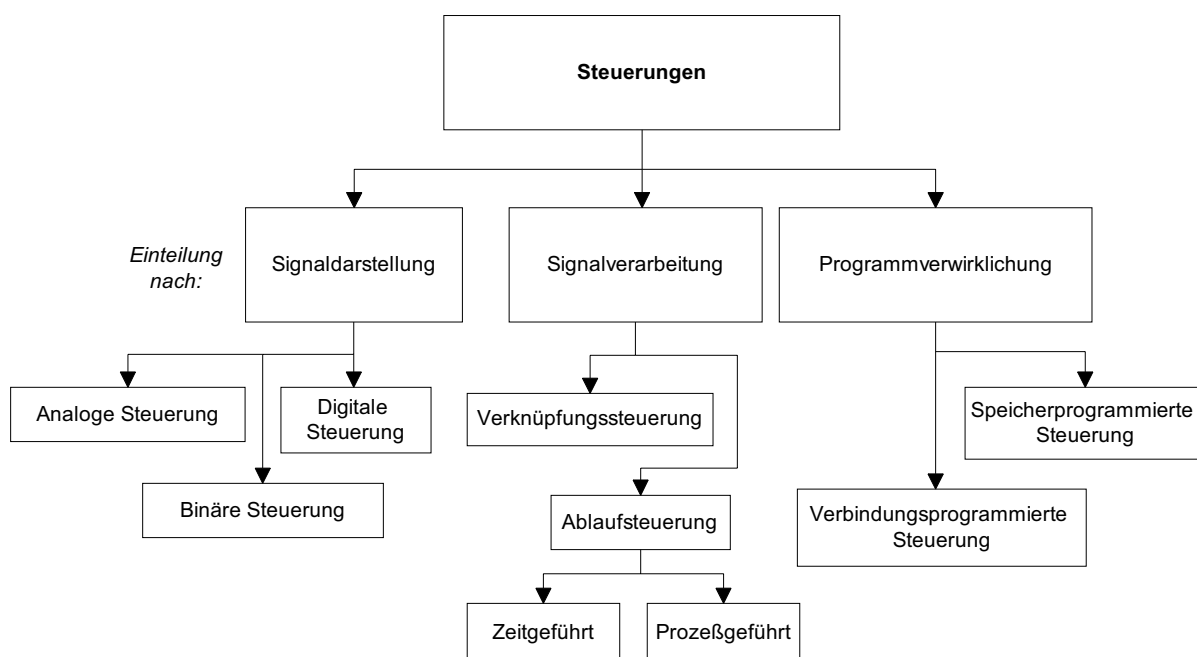

Die einzelnen Steuerungen sind auf folgende Art definiert:

**Definition: Analoge Steuerung**

Die **analoge Steuerung** verknüpft analoge Ein- und Ausgangssignale durch eine sich kontinuierlich ändernde Steuerungsvorschrift.

**Definition: Binäre Steuerung**

**Binäre Steuerungen** verarbeiten vorwiegend 2-wertige logische Informationen durch BOOLEsche Gesetzmäßigkeiten.

**Definition: Kombinatorische Steuerung**

Werden mehrere binäre Eingangssignale zur Funktionsfähigkeit einer Anlage benötigt, spricht man von einer **kombinatorischen Steuerung**.

**Definition: Digitale Steuerung**

**Digitale Steuerungen** verarbeiten numerische Werte.

**Definition: Schaltnetz**

Ein **Schaltnetz** verknüpft die Ein- und Ausgänge einer Steuerung durch logische Funktionen  $\underline{A} = f(\underline{E})$ , den sogenannten Schaltfunktionen.

**Definition: Schaltwerk**

**Schaltwerke** sind Realisierungen von Steuerungen mit logischen Funktionen und zusätzlichen Speicherfunktionen, derart, dass die Ausgänge der Steuerung auch vom aktuellen Schaltwerkzustand abhängen.

**Definition: Sequentielle Steuerung**

**Sequentielle Steuerungen** besitzen die Eigenschaften von Schaltwerken. Bei ihrem Verhalten ist zur Bestimmung der Ausgangsgrößen (Stellgrößen) der vorherige Zustand des Schaltnetzes zu berücksichtigen.

**Definition: Ausgangsfunktion**

Die **Ausgangsfunktion** einer sequentiellen Steuerung beschreibt, wie sich die Ausgänge  $\underline{A}$  aus den gespeicherten Zuständen  $\underline{Z}$  des Schaltwerks und den Eingangswerten  $\underline{E}$  ergeben.

**Definition: Zustandsübergangsfunktion**

Die **Zustandsübergangsfunktion** eines Schaltwerks legt die neu zu speichernden Zustände  $\underline{Z}'$  aus den gespeicherten Zuständen  $\underline{Z}$  und den Eingangswerten  $\underline{E}$  fest.

**Definition: Automat**

Schaltwerke werden als **Automaten** bezeichnet.

**Definition: Verknüpfungssteuerung**

Eine **Verknüpfungssteuerung** ist eine Steuerung, die den Signalzuständen der Eingangssignale bestimmte Signalzustände der Ausgangssignale im Sinne BOOLEscher (logischer) Verknüpfungen unmittelbar zuordnet.

**Definition: Synchrone Steuerung**

Bei einer **synchronen Steuerung** erfolgt die Signalverarbeitung synchron zu einem Taktsignal.

**Definition: Asynchrone Steuerung**

Bei der **asynchronen Steuerung** werden die Signaländerungen am Ausgang nur durch die Eingangssignale festgelegt.

**Definition: Ablaufsteuerung**

Eine **Ablaufsteuerung** ist eine Steuerung mit einem zwangsläufig schrittweisen Ablauf, bei der das Weiterschalten von einem Schritt auf den programmgemäß folgenden abhängig von Weiterschaltbedingungen erfolgt.

**Zeitgeführt:** Hängen die Weiterschaltbedingungen nur von Zeitabläufen ab, spricht man von einer zeitgeführten Ablaufsteuerung.

**Prozessgeführt:** Spielen bei den Weiterschaltbedingungen die Prozesssignale eine Rolle, liegt eine prozessgeführte Ablaufsteuerung vor.

**Definition: Steuerprogramm**

Das **Steuerprogramm** beschreibt die Gesamtheit aller Anweisungen, Vereinbarungen und Signalführungen für die Verarbeitung der Prozesssignale.

**Definition: Verbindungsprogrammierte Steuerung**

Bei **verbindungsprogrammierten Steuerungen** bestimmen die Funktionseinheiten und deren Verbindungen das Steuerprogramm.

**Definition: Speicherprogrammierbare Steuerung (SPS)**

Bei den **speicherprogrammierbaren Steuerungen** sind die Steueranweisungen in einem Programmspeicher hinterlegt und werden durch einen Programmschrittzähler in Reihenfolge aufgerufen.

## 4.3 Methoden und Verfahren

Die Ein- und Ausgangssignale einer kombinatorischen und sequentiellen Steuerung sind binäre Größen. Diese nehmen zwei Werte ein. Die Schaltalgebra bzw. Aussagenlogik beschreibt die Gesetze für binäre Steuerungen.

In der Steuerungstechnik versucht man die Fülle komplexer Verknüpfungen auf Basisfunktionen bzw. logische Grundfunktionen zurückzuführen. Diese werden im folgenden dargestellt:

**Definition: Logische Variable**

Eine **logische Variable** der Booleschen Algebra stellt eine zweiwertige Größe mit den beiden Zuständen 0 und 1 (wahr und unwahr) dar.

**Definition: Schaltalgebra bzw. Aussagenlogik**

Die **Schaltalgebra** bzw. **Aussagenlogik** beschreibt die Verknüpfung wahrer und unwahrer Aussagen.

**Definition: Wahrheits- oder Funktionstabelle**

Die Ergebnisse von Verknüpfungen logischer Variablen lassen sich in **Wahrheits-** bzw. **Funktionstabellen** darstellen.

**Definition: Identität**

Das Ausgangssignal A der **Identität** besitzt genau dann den Wert 1, wenn das Eingangssignal E den Wert 1 hat.

**Definition: Negation**

Das Ausgangssignal A der **Negation** besitzt genau dann den Wert 1, wenn das Eingangssignal E den Wert 0 aufweist und umgekehrt.

**Definition: Konjunktion - AND**

Das Ausgangssignal einer **Konjunktion** – UND-Verknüpfung – besitzt nur dann den Wert 1, wenn alle Eingangssignale den Wert 1 besitzen.

**Definition: Disjunktion - OR**

Das Ausgangssignal der **Disjunktion** – ODER-Verknüpfung – besitzt den Wert 1, wenn mindestens ein Eingangssignal den Wert 1 hat.

**Definition: Äquivalenz - EQU**

Das Ausgangssignal der **Äquivalenz** – GLEICH-Verknüpfung – besitzt dann den Wert 1, wenn beide Eingangssignale denselben Wert 0 oder 1 haben.

**Definition: Antivalenz oder EXKLUSIV-ODER - XOR**

Das Ausgangssignal der **Antivalenz** – EXKLUSIV-ODER-Verknüpfung – besitzt dann den Wert 1, wenn beide Eingangssignale einen ungleichen Wert haben.

**Definition: Nicht-UND - NAND**

Das Ausgangssignal der **Nicht-UND** besitzt dann den Wert 1, wenn beide Eingangssignale nicht gleichzeitig den Wert 1 haben.

**Definition: Nicht-ODER - NOR**

Das Ausgangssignal der **Nicht-ODER** besitzt dann den Wert 1, wenn beide Eingangssignale gleichzeitig den Wert 0 haben.

**Definition: Flipflop-Schaltung**

Speicherschaltungen mit zwei festen Ausgangszuständen, die nicht nur vom Zustand der Eingangssignale abhängen, sondern auch vom Ausgang der Schaltung, bezeichnet man als **Flipflop-Schaltungen** (bistabile Kippstufen).

**Definition: RS-Flipflop**

Bei einem **RS-Speicherelement (RS-Flipflop)** nimmt der Ausgang Q den Signalzustand 1 an, wenn der Eingang S kurzzeitig ein 1-Signal führt. Der 1-Zustand am Ausgang Q wird solange gespeichert, bis an den Eingang R ein 1-Signal angelegt wird.

**Definition: JK-Flipflop**

Bei einem **JK-Flipflop** nimmt der Ausgang Q den Signalzustand 1 an, wenn der Eingang J kurzzeitig ein 1-Signal führt. Der 1-Zustand am Ausgang Q wird solange gespeichert, bis an den Eingang K ein 1-Signal angelegt wird. Wird an beiden Eingängen J und K ein 1-Signal angelegt, negiert sich der seitherige Ausgangswert zu  $\bar{Q}$ .

**Definition: D-Flipflop**

Bei einem **D-Flipflop** nimmt der Ausgang Q den Signalzustand des D-Eingangs zum Zeitpunkt der Taktung an.

**Definition: Impuls - SI**

Bei einem Zustandswechsel von 0 nach 1 am Startereingang ( $\uparrow$ ) wird der Ausgang für die Zeit TW (Zeitdauer) eingeschaltet (auf den Wert 1 gesetzt). Bei Rücksetzen des Eingangs vor der Zeit TW wird der Ausgang ebenfalls zurückgenommen. Ansonsten kann der Ausgang Q durch das Aktivieren des Reset-Eingangs R auf 0 zurückgesetzt werden.

**Definition: Verlängerter Impuls (Monoflop) - SV**

Bei einem Zustandswechsel von **0** nach **1** am Startereingang ( $1 \downarrow \uparrow \vee$ ) wird der Ausgang Q für die Zeit TW eingeschaltet. Der Ausgang Q bleibt unabhängig von der zeitlichen Länge dieses Eingangs gesetzt. Beginnt während der vorgegeben Zeitdauer ein erneutes Startsignal, startet die Zeitnahme aufs neue, so dass sich der Ausgang Q verlängert. Das vorzeitige Rücksetzen von Q kann mit einem **1**-Signal am Reset-Eingang erreicht werden.

**Definition: Einschaltverzögerung - SE**

Bei einem Zustandswechsel von **0** nach **1** am Startereingang ( $T \dashv \vdash 0$ ) der **Einschaltverzögerung** wird der Ausgang Q nach der Zeitspanne TW eingeschaltet. Erst nach Ablauf der Zeitdauer TW erscheint am Ausgang der Impuls, sofern das Eingangssignal noch anliegt. Der Ausgang wird verzögert eingeschaltet. Der Ausgang Q kann jederzeit durch das Setzen des Reset-Eingangs R auf **0** gesetzt werden.

**Definition: Ausschaltverzögerung - SA**

Bei einem Zustandswechsel von **0** nach **1** am Startereingang ( $T \dashv \vdash 0$ ) der **Ausschaltverzögerung** wird der Ausgang Q auf **1** gesetzt. Wechselt dieser Eingang wieder von **1** nach **0**, beginnt die Zeit TW zu laufen. Erst nach Ablauf der Zeitdauer nimmt der Ausgang den Signalzustand **0** an. Der **Ausgang wird verzögert abgeschaltet**. Ansonsten kann der Ausgang Q durch das Setzen des Reset-Eingangs R auf **0** gesetzt werden.

**Rechengesetze der Schaltalgebra**

|                       |                                                                                       |                                                                           |
|-----------------------|---------------------------------------------------------------------------------------|---------------------------------------------------------------------------|
| Neutralität:          | $x1 \wedge 1 = x1$                                                                    | $x1 \vee 1 = 1$                                                           |
| <b>0</b> -Regel       | $x1 \wedge 0 = 0$                                                                     | $x1 \vee 0 = x1$                                                          |
| Idempotenzgesetz      | $x1 \wedge x1 = x1$                                                                   | $x1 \vee x1 = x1$                                                         |
| Komplementgesetz      | $x1 \wedge \overline{x1} = 0$                                                         | $x1 \vee \overline{x1} = 1$                                               |
| Doppeltes Komplement  | $\overline{\overline{x}} = x$                                                         |                                                                           |
| Kommutativgesetz      | $x1 \wedge x2 = x2 \wedge x1$                                                         | $x1 \vee x2 = x2 \vee x1$                                                 |
| Assoziativgesetz      | $x1 \wedge (x2 \wedge x3) = (x1 \wedge x2) \wedge x3$<br>$= (x1 \wedge x3) \wedge x2$ | $x1 \vee (x2 \vee x3) = (x1 \vee x2) \vee x3$<br>$= (x1 \vee x3) \vee x2$ |
| Distributivgesetz     | $x1 \wedge (x2 \vee x3) = (x1 \wedge x2) \vee (x1 \wedge x3)$                         | $x1 \vee (x2 \wedge x3) = (x1 \vee x2) \wedge (x1 \vee x3)$               |
| Absorptionsgesetz     | $x1 \wedge (x1 \vee x2) = x1$                                                         | $x1 \vee (x1 \wedge x2) = x1$                                             |
| Gesetze von De Morgan | $\overline{x1 \wedge x2} = \overline{x1} \vee \overline{x2}$                          | $\overline{x1 \vee x2} = \overline{x1} \wedge \overline{x2}$              |

Entwurfsmethoden und wichtige Begriffe für kombinatorische und sequentielle Steuerungen:

**Definition: Max-Term**

Ein **Max-Term** ist die disjunktive Verknüpfung aller logischen Eingangsvariablen einer Schaltfunktion, die den Ausgangswert 0 ergibt.

**Definition: Min-Term**

Ein **Min-Term** ist die konjunktive Verknüpfung aller logischen Eingangsvariablen einer Schaltfunktion, die den Ausgangswert 1 ergibt.

**Methode: Disjunktive Normalform (KNF)**

Die **disjunktive Normalform** gewinnt man durch die disjunktive Verknüpfung aller Max-Terme der Wahrheitstabelle einer Steuerungsfunktion mit anschließender Anwendung der De Morgan-Gesetze.

**Methode: Konjunktive Normalform (DNF)**

Die **konjunktive Normalform** gewinnt man durch die konjunktive Verknüpfung aller Min-Terme der Wahrheitstabelle einer Steuerungsfunktion.

**Definition: Karnaugh-Veitch-Diagramm (KV-Diagramm)**

Das **Karnaugh-Veitch-Diagramm** dient zur Darstellung von Schaltfunktionen mehrerer Eingangsvariablen zu einer Ausgangsvariablen durch 2-dimensionale Felder. Daraus kann durch Symmetriebetrachtungen die optimierte Schaltfunktion bestimmt werden.

**Methode: Karnaugh-Veitch-Verfahren (KV-Verfahren)**

1. Es werden alle zu Symmetrieachsen liegende Felder bzw. Blöcke mit dem Wert 1 bzw. 0 zusammengefasst und markiert. Die Blöcke dürfen sich überlappen.
2. Die Zahl der Felder in einem markierten Block muss eine Potenz von 2 sein.
3. Alle Eingangsvariablen, die innerhalb der Markierungen unverändert bleiben, ergeben für die Schaltfunktion **UND-** bzw. **ODER-**verknüpfte Terme. Die sich verändernden Variablen werden eliminiert.
4. Im Falle der **ODER-**Verknüpfungen müssen die auftretenden Variablen zusätzlich negiert werden.
5. Die reduzierte Schaltfunktion ist eine **disjunktive** bzw. **konjunktive** Verknüpfung der ausgewählten Terme aus Regel 3.
6. Alle nicht markierbaren übrigen Einzelfelder ergeben in der Schaltfunktion disjunktiv bzw. konjunktiv **UND-** bzw. **ODER-**verknüpfte Terme der entsprechend auftretenden Variablen.

Eine Auswahl der wichtigsten Beschreibungsformungen für Steuerungen wird in folgenden Begriffen zusammengefasst:

**Definition: Schaltbelegungstabelle**

In **Schaltbelegungstabellen** werden die logischen Ausgangsvariablen von allen möglichen Kombinationen der Eingangsvariablen dargestellt. Sie beschreiben logische Funktionen.

**Definition: Schaltfolgetabelle**

Eine **Schaltfolgetabelle** stellt die Abhängigkeit der Ausgangssignale A von den Eingangssignalen E unter Berücksichtigung des erreichten Schrittes, Zustands oder Takts dar.

**Definition: Schaltfolgediagramm**

Die funktionelle Darstellung der Ein- und Ausgangsvariablen einer sequentiellen Schaltung über Steuerungsschritten, -zuständen oder der Zeit bezeichnet man als **Schaltfolgediagramm** bzw. Ablaufdiagramm.

**Definition: Stromlaufplan**

Durch **Stromlaufpläne** werden elektrische Kontaktsteuerungen dargestellt, bei denen genormte Kennzeichnungen und Darstellungen der Schaltgeräte nach DIN 40713 verwendet werden.

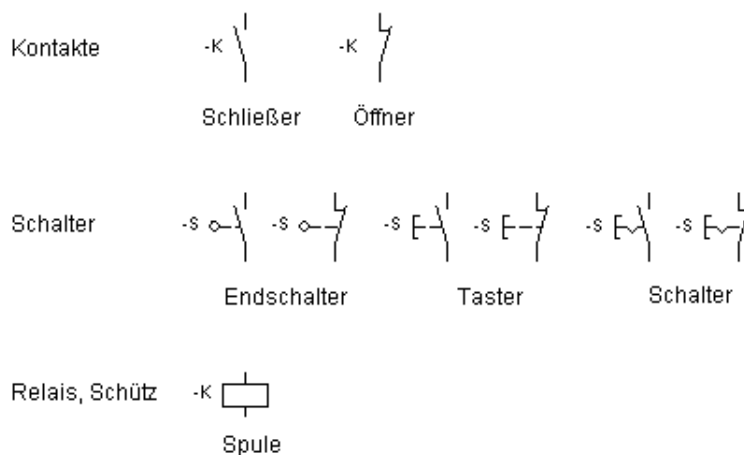

**Definition: Kontaktplan**

In einem **Kontaktplan** werden nur die für die logischen Funktionen entscheidenden Kontakte und Verbindungen einer Steuerung in Strompfaden dargestellt, wozu die in **Fehler! Verweisquelle konnte nicht gefunden werden.** dargestellten Symbole Verwendung finden (DIN 19239).

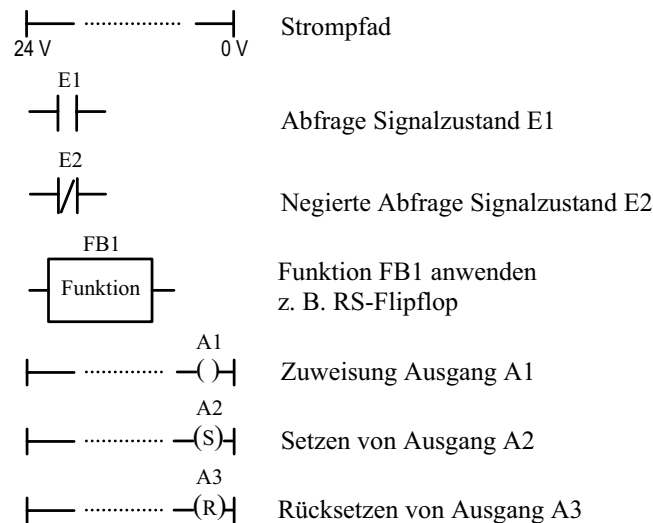**Definition: Logik- oder Funktionsplan (zustandsorientiert)**

Der **Logik- oder Funktionsplan (zustandsorientiert)** ist die bildliche Darstellung einer Steuerung mittels Blocksymbolen (nach DIN 40900 und DIN 19239), welche komplexe logische Funktionen darstellen. Die Symbole werden durch Wirkungslinien mit oder ohne Negation untereinander verbunden.

**Definition: Funktions- oder Ablaufplan**

Im **ablauforientierten Funktionsplan** oder **Ablaufplan** nach DIN 40719 werden Steuerungsschritte durch zeitlich nacheinander auszuführende Schrittsymbole beschrieben, welche erst durch zu erfüllende Weiterschaltbedingungen bearbeitet werden. Die Struktur der Schrittkette entspricht dem schrittweisen Ablauf der Steuerung. Die Schrittsymbole werden untereinander dargestellt. Jedes Schrittsymbol beschreibt einen Zustand des Steuerungssystems.

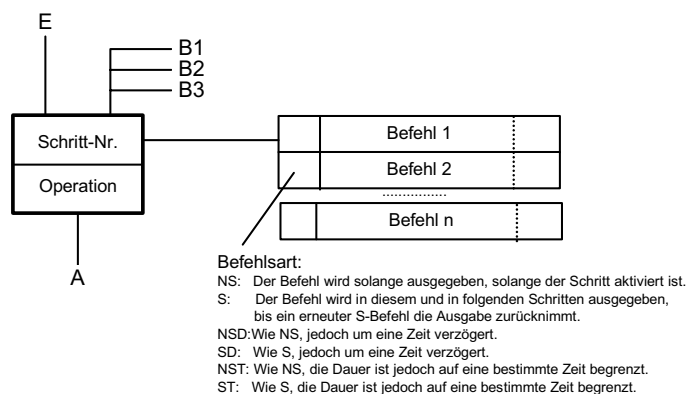**Definition: Zustands- oder Automatengraph**

In einem **Zustands- bzw. Automatengraphen** werden die inneren Zustände durch Knoten (Kreise mit Kennzeichnungen) und die Übergangsmöglichkeiten als **Transitionen** bezeichnet, zwischen den Zuständen durch gerichtete Kanten (Pfeile) dargestellt. Die Bedingungen für einen Zustandswechsel werden an den gerichteten Kanten notiert.



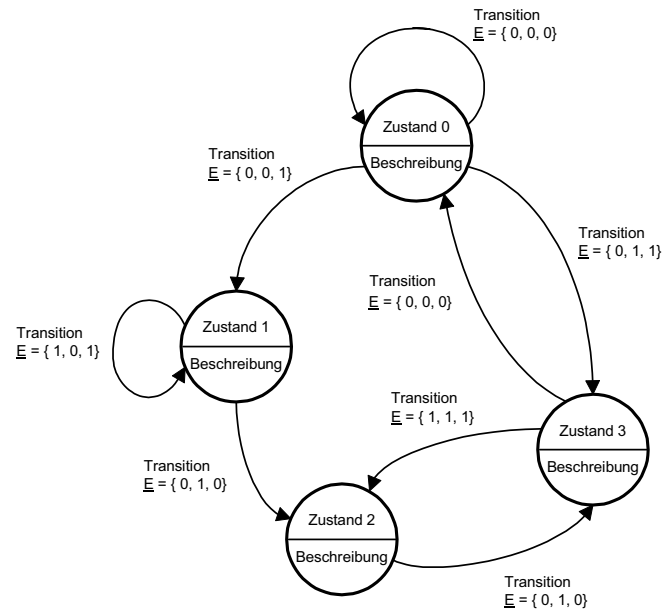

### Definition: Programmablaufplan (PAP)

Der **Programmablaufplan** beschreibt durch Sinnbilder und Ablauflinien den Ablauf oder die Reihenfolge von Operationen, die zur Lösung der Steuerungsaufgabe notwendig sind.

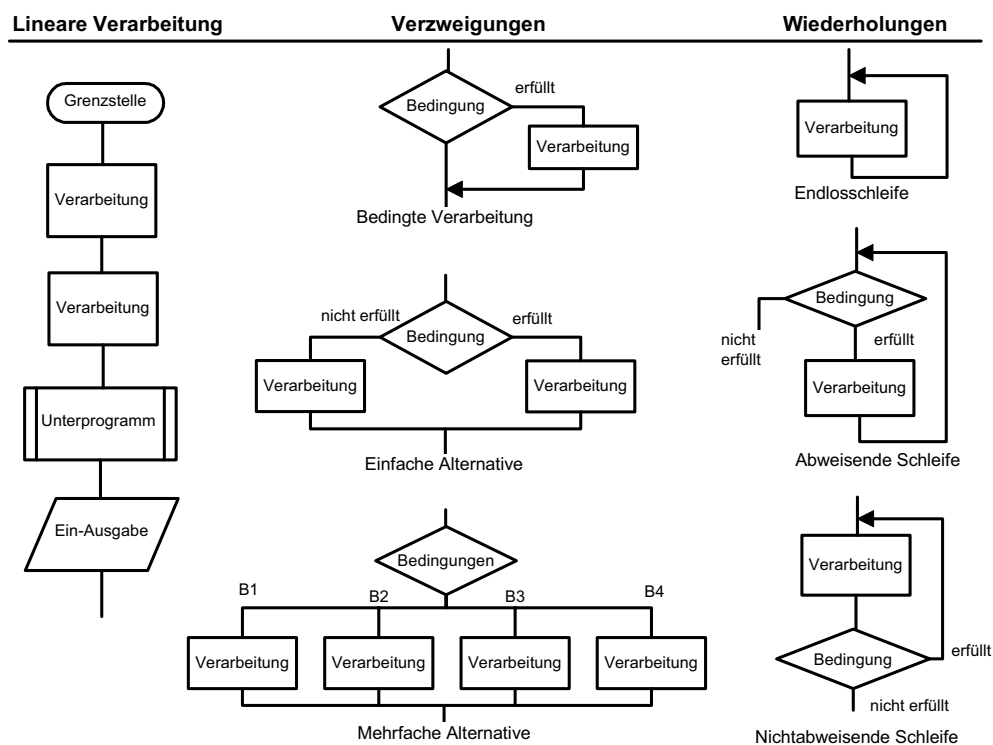

## 4.4 Speicherprogrammierbare Steuerungen - SPS

Die Prozessdatenverarbeitung schafft die Voraussetzung für Speicherprogrammierbare Steuerungen. PDV-Rechner weisen gegenüber konventionellen Computern die folgenden wichtigen Fähigkeiten auf:

### PDV-Fähigkeit 1: Prozesskopplung

Die **Prozesskopplung** einer PDV-Anlage realisiert sich mit Dateneingabeeinheiten für die Messwert- und Zustandserfassung, sowie für die Steuerwertausgabe mit Datenausgabeeinheiten.

### PDV-Fähigkeit 2: Echtzeitbetrieb

Der **Echtzeitbetrieb** (real time processing) verlangt die zeitbezogene Bearbeitung von Prozessaufgaben. Hier geben externe, an den Rechner angeschlossene Anlagen und Maschinen den Ton an. Dabei darf die externe Unterbrechung natürlich im Innern des Rechners nichts durcheinander bringen.

#### Definition: Echtzeitbetrieb

Ein Rechensystem arbeitet im **Echtzeitbetrieb**, wenn es auf die gleichzeitig auftretenden Prozesssignale rechtzeitig, im Sinne von Erfassen und Ausgeben, reagieren kann.

#### Definition: Echtzeitbetriebssystem

Ein Betriebssystem, das ein Rechensystem in die Lage versetzt, im Echtzeitbetrieb zu operieren, heißt **Echtzeitbetriebssystem**.

Am günstigsten wird der Echtzeitbetrieb durch die Aufteilung der Rechenaufgaben in Teile erreicht, welche je nach Wichtigkeit nacheinander und/oder gleichzeitig ausgeführt werden. Das wird erreicht durch:

#### Definition: Task

Die parallel ablaufenden Rechenprozesse zur Bearbeitung von DV-Aufgaben werden als **Tasks** bezeichnet.

#### Definition: Programm-Unterbrechungssystem

Das **Programm-Unterbrechungssystem** bearbeitet beim Eintreffen externer Anforderungen (Interrupts) die Tasks nach ihrer Priorität; eine laufende Task mit niedriger Priorität wird unterbrochen und die angeforderte Task mit höherer Priorität bearbeitet.

### Arten rechnergestützter Automatisierungssysteme:

#### Art: Speicherprogrammierbare Steuerung - SPS

**SPSen** sind speziell für die Steuerungstechnik konzipierte Rechnersysteme mit einer breiten Palette an Ein-/Ausgabebaugruppen.

#### Art: Industrie-PC - IPC

**IPC** sind üblicherweise Personalcomputer (PC) mit industrietauglichem elektrischen und mechanischen Aufbau. Die Prozesskopplung wird über Ein-/Ausgabe-Baugruppen der standardisierten Rechnerbusschnittstellen abgewickelt.

#### Art: Prozessleitsystem -PLS

**PLS** sind i. a. dezentralisierte und hierarchisch aufgebaute Rechnersysteme. Ein PLS kann als SPS- und/oder IPC-System aufgebaut werden.

### Aufbau einer Speicherprogrammierbaren Steuerung

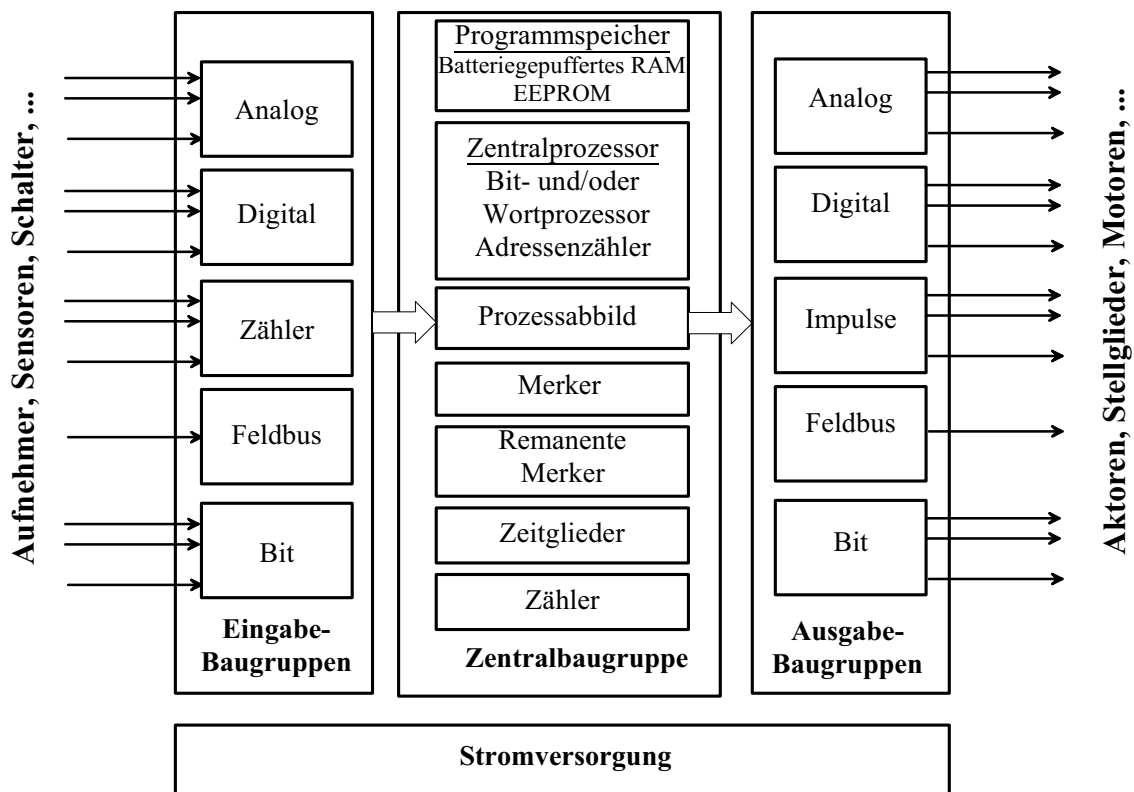

#### Definition: Prozessabbild

Das **Prozessabbild** ist ein Speicherbereich, in dem sich die SPS die Signalinformationen der Ein- und Ausgangsbaugruppen zwischenspeichert. Die Informationen spiegeln getreu die beteiligten Prozessgrößen wider.

#### Definition: Merker

Die **Merker** sind Speicherelemente, in denen sich der Zentralprozessor Zwischenergebnisse, Signalzustände oder Informationen sichert, die für logische Verknüpfungen benötigt werden.

#### Definition: Zeitglieder und Zähler

**Zeitglieder und Zähler** sind ebenfalls Speicher, in denen sich der Zentralprozessor (CPU) Zahlenwerte zwischenspeichert. Diese Zahlenwerte dienen zusammen mit interruptgesteuerten Routinen zur Generierung von Zeitfunktionen, wie z. B. für Monoflops.

#### Definition: Stromversorgung

Die **Stromversorgung** erzeugt aus der Eingangsspannung (in der Regel 220 V~) geregelte und getrennte Spannungen von +5V, ±15V und/oder +24V für die interne Strom- und Spannungsversorgung der Baugruppen. Die an eine SPS angeschlossenen externen Systeme, wie Sensoren, Schalter, Aktoren, Stellglieder und Motoren, benötigen eigene Stromversorgungen.

#### Definition: Eingabebaugruppe

Die **Eingabebaugruppen** bereiten alle externen Signale der Geber zur internen Weiterverarbeitung auf.

#### Definition: Ausgabebaugruppe

Die **Ausgabeeinheiten** stellen bei konfektionierten Speicherprogrammierbaren Steuerungen Relais- und Transistorausgänge zur Verfügung. Darüber hinaus gibt es eine breite Palette von Ausgabebaugruppen für modular zusammenstellbare SPSen. Deren Signaltypen und -pegel entsprechen denen der Eingabebaugruppen.

**Definition: Anschalt-und Kommunikationsbaugruppe**

Zur Vernetzung und zum Anschluss weiterer Geräte an die SPS sind **Anschalt-und Kommunikationsbaugruppen** erforderlich. Anschaltbaugruppen dienen zur Verbindung von Programmiergeräten mit der SPS oder es können weitere E/A-Geräte an die SPS angehängt werden. Mit den Anschaltbaugruppen werden sogenannte Punkt-zu-Punkt-Verbindungen realisiert. Mit Kommunikationsbaugruppen lassen sich dagegen Busverbindungen aufbauen, d. h. es können mehrere Geräte, auch weitere SPSen, zu einem Netzwerk zusammengeschlossen werden.

**Betriebsarten bei Speicherprogrammierbaren Steuerungen:****Definition: Anlauf-Betriebsart**

Der Anlauf-Betrieb einer SPS dient zur Schaffung definierter Anfangszustände von Ausgabesignalen und auch zur Initialisierung von Datenbausteinen.

**Definition: Permanent zyklischer Betrieb**

Bei der Programmverarbeitung durch die Zentraleinheit werden über den Adresszähler die Adressen der Speicherzeilen mit dem Steuerungsprogramm angewählt und ausgeführt. Danach wird der Adresszähler um eine Adresseinheit erhöht und der nächste Steuerbefehl kommt zur Ausführung. Mit Sonderoperationen (z. B. Sprungbefehle) können auch andere Adressen angewählt werden. Am Programm-Ende beginnt die Bearbeitung von vorne, so dass man von einer zyklischen Programmbearbeitung spricht.

**Definition: Alarmgesteuerte Betriebsart**

Spezielle Eingabebaugruppen (sog. Baugruppen mit Alarmbearbeitung) können Interruptsignale des Prozessors auslösen. Diese führen zur vorrangigen Bearbeitung von Alarm-Programmen; der permanent zyklische Betrieb wird für diese Zeit unterbrochen.

**Definition: Zeitgesteuerter Betriebsart**

Der permanent zyklische Betrieb ist für die Bearbeitung von Aufgaben, welche zu regelmäßigen Zeitpunkten erledigt werden müssen, ungeeignet. Im zeitgesteuerten Betrieb ruft das Betriebssystem automatisch im Abstand fest definierter Zeitintervalle (10 ms – 5 s) in Organisationsbausteinen programmierte Funktionen zur Erledigung regelmäßig wiederkehrender Aufgaben auf.

Die Modularisierung von SPS-Programmen wird durch die Baustein-Technik erreicht:

**Definition: Baustein**

**Bausteine** enthalten funktionell unabhängige Programme für Speicherprogrammierbare Steuerungen.

Es existieren 5 unterschiedliche Bausteinarten zur SPS-Programmierung:

**Organisationsbausteine (OB)** bilden die direkte Schnittstelle zwischen dem Betriebssystem und dem Anwenderprogramm, sie besitzen eine Steuerfunktion für SPS-Programme.

**Programmbausteine (PB)** sind zur Programmierung funktionell abgeschlossener Programmteile geeignet, welche nicht parametrisiert werden brauchen.

**Funktionsbausteine (FB)** sind im Gegensatz zu Programmbausteinen zur Programmierung von Funktionen mit Parameterübergabe geeignet; sie besitzen damit kein "Gedächtnis".

**Datenbausteine (DB)** stellen Platz zur nichtremanenten Zwischenspeicherung von Berechnungsergebnissen zur Verfügung.

**Schrittbusteine (SB)** eignen sich speziell zur Programmierung für Ablaufsteuerungen. Solche Bausteine beinhalten die einzelnen Schritketten mit Schrittanweisungen und Weiterschaltbedingungen.

Seitherige SPS-Programmentwicklung mit:

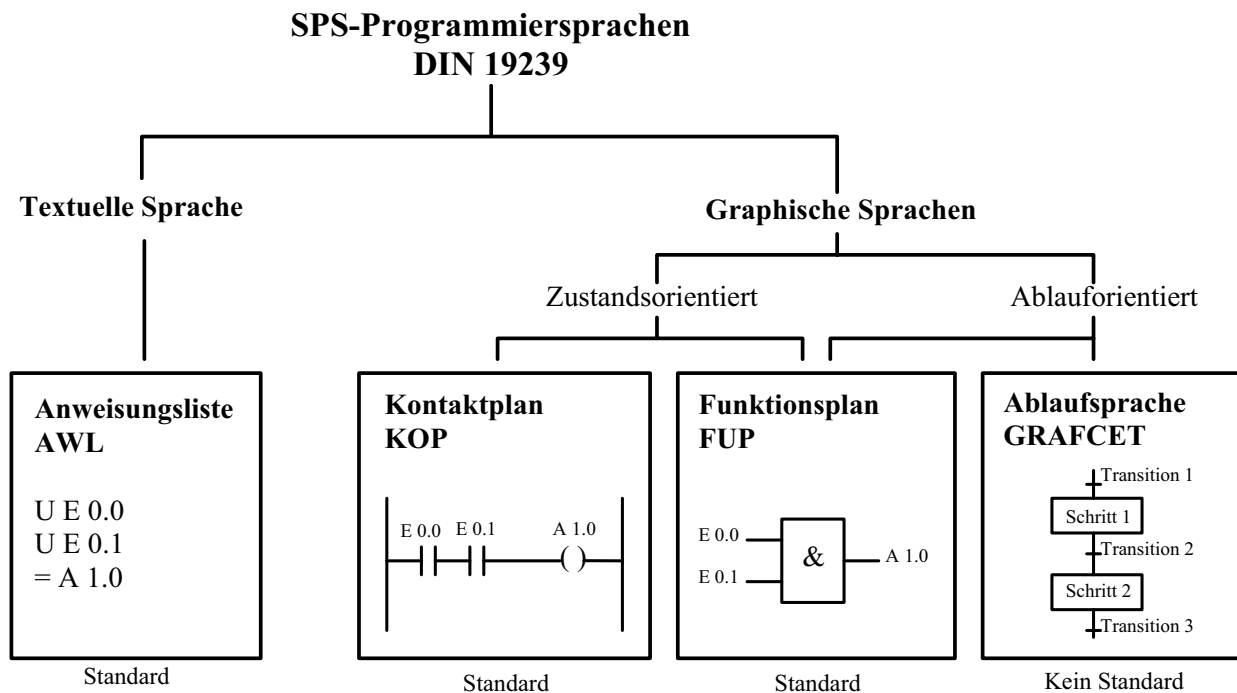

Beim **Kontaktplan** wird das SPS-Programm als Verkettung von Schalt- und Relaiskontakten dargestellt. Er entspricht dem bekannten **Kontaktplan** für Steuerungen, dessen Herkunft der Stromlaufplan aus der Elektrotechnik ist.

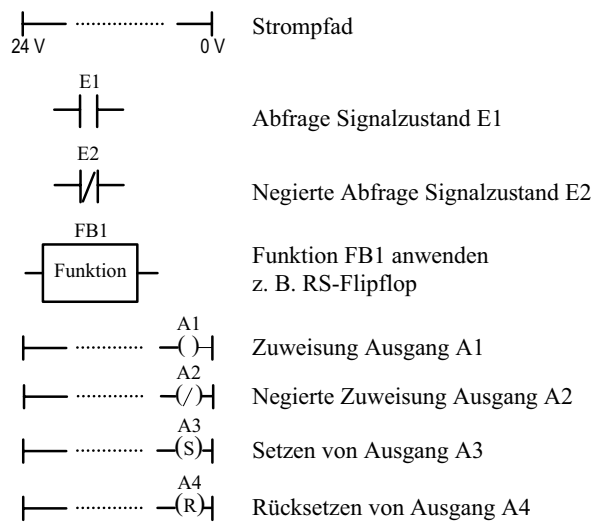

Die **Anweisungsliste** ist eine assemblerähnliche (vereinheitlichte) Programmiersprache. Sie bietet dem Programmierer zur Formulierung der Anwenderprogramme die vielfältigsten Möglichkeiten. Er unterliegt keinen Einschränkungen, wie sie beim graphischen Kontaktplan vorhanden sind.

Die Programmierart in Form des **Funktionsplans** lehnt sich weitgehend an die gleichnamige Beschreibungsform zur Darstellung von Schaltnetzen und -werken an (Logikplan und Funktionsplan).

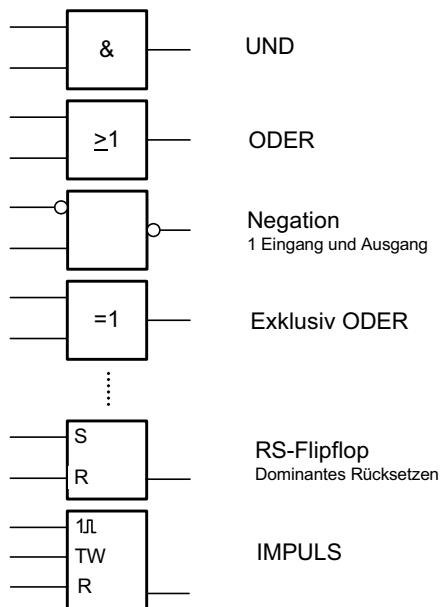

Tabelle: AWL-Befehle<sup>1</sup>

| Befehlsmnemonik         | Operation                                                                                                                 |
|-------------------------|---------------------------------------------------------------------------------------------------------------------------|
| U                       | UND (Konjunktion)                                                                                                         |
| UN                      | UND NICHT (Konjunktion mit Negation)                                                                                      |
| O                       | ODER (Disjunktion)                                                                                                        |
| ON                      | ODER NICHT (Disjunktion mit Negation)                                                                                     |
| S                       | Setzen eines Speichers                                                                                                    |
| R                       | Zurücksetzen eines Speichers                                                                                              |
| ZV                      | Vorwärts zählen                                                                                                           |
| ZR                      | Rückwärts zählen                                                                                                          |
| SI, SV<br>SE, SS,<br>SA | Zeitfunktionen: Impuls, verlängerter Impuls, Einschaltverzögerung, speichernde Einschaltverzögerung, Ausschaltverzögerung |
| ADD, +F                 | Addieren                                                                                                                  |
| SUB, -F                 | Subtrahieren                                                                                                              |
| MUL, ·F                 | Multiplizieren                                                                                                            |
| DIV, :F                 | Dividieren                                                                                                                |
| GR, GRG, >F, >=F        | Vergleichen: Größer, Größer gleich                                                                                        |
| GL, =F                  | Vergleichen: Gleich                                                                                                       |
| KL, KLG, <F, <=F        | Vergleichen: Kleiner, Kleiner gleich                                                                                      |
| =                       | Zuweisung                                                                                                                 |
| NOP                     | Keine Operation                                                                                                           |
| L, T                    | Laden, Transferieren eines Operanden                                                                                      |
| ()                      | Öffnen und Schließen eines Verknüpfungszweiges                                                                            |
| A,                      | Aktivieren eines Datenbausteins                                                                                           |
| SP                      | Absoluter Sprung zu anderer Programmstelle                                                                                |
| SPB                     | Bedingter Sprung zu anderer Programmstelle                                                                                |
| BA                      | Unbedingter Aufruf eines Bausteins                                                                                        |
| BAB                     | Bedingter Aufruf eines Bausteins                                                                                          |
| BE (BEB, BEA)           | Baustein Ende (bedingt, absolut)                                                                                          |
| PE                      | Programm Ende                                                                                                             |

## SPS-Standard EN 61131 (IEC 1131)

### Gründe für eine neue SPS-Norm sind:

- Vereinheitlichung vorhandener Sprachen
- Bereitstellung einer höheren SPS-Programmiersprache
- Verbesserung der Programmiersicherheit durch ein neues Variablenkonzept
- Objektorientierte Programmierertechnik bereitstellen
- Beschreibung von dezentralisierten Automatisierungssystemen
- Bereitstellung von Client-Serverfähigkeiten zur Kommunikation mit anderen SPSen

Mit dezentral organisierten autarken Systemen lassen sich umfangreichere Steuerungsaufgaben lösen. Diese müssen untereinander und mit übergeordneten Rechnern gekoppelt sein. Es entsteht ein Prozessleitsystem mit seinen Hierarchieebenen. Die nachfolgende Abbildung stellt ein solches Prozessleitsystem mit seinen Schichten dar:

<sup>1</sup> Die angegebenen Befehle sind ein Auszug aus der DIN 19239 und aus der verbreiteten SPS-Sprache STEP5 (Fa. Siemens AG)

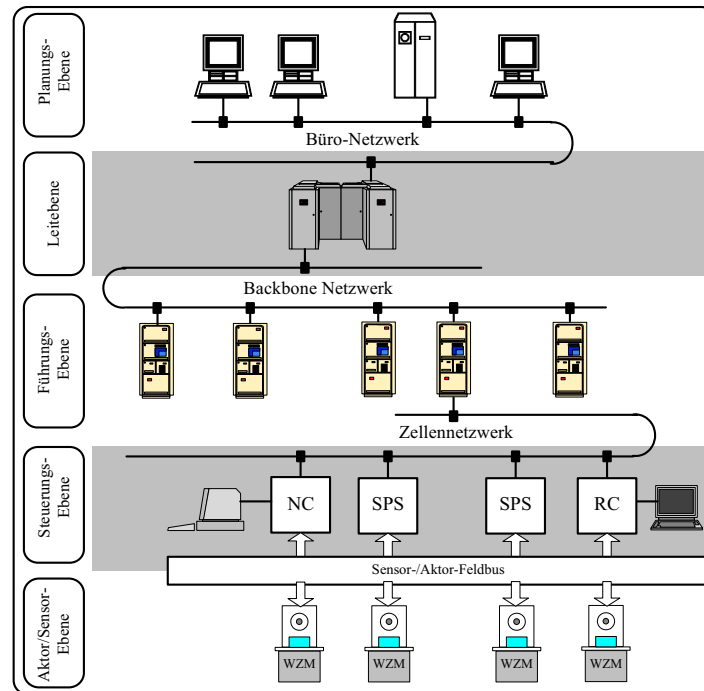

### SPS-Hardwaremodell IEC 1131

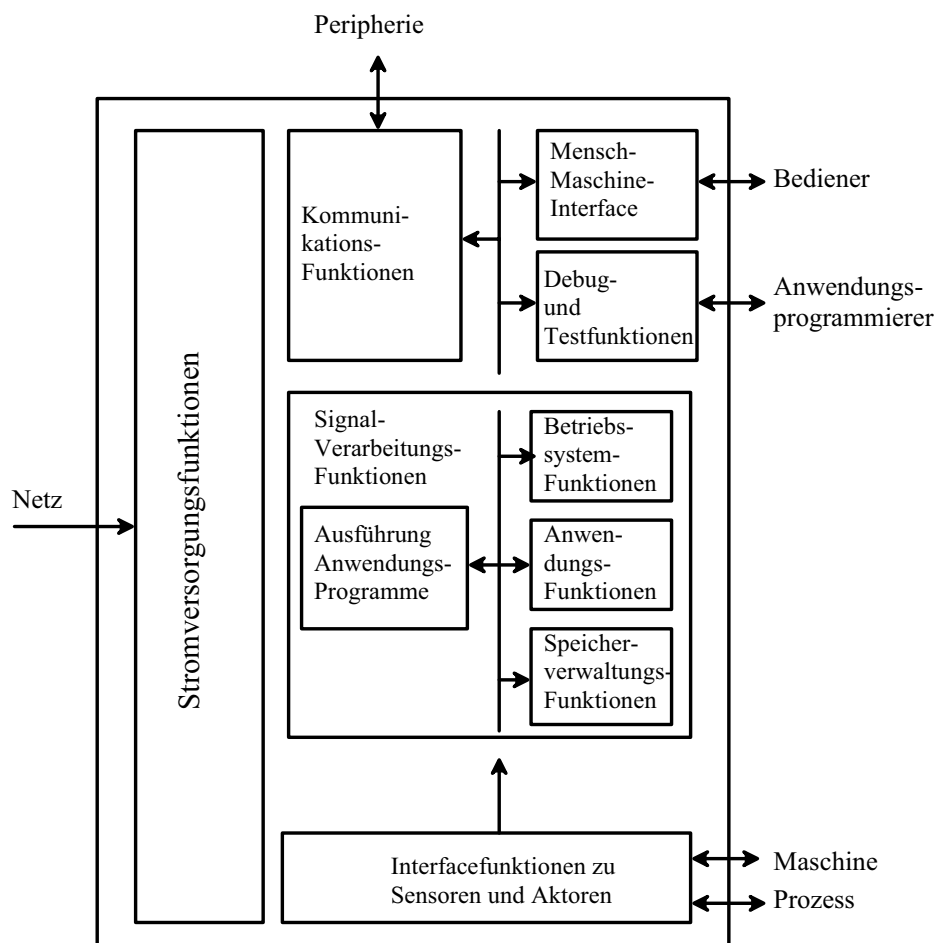

## SPS-Softwaremodell IEC 1131

### Definition: Konfiguration

Ein Automatisierungssystem setzt sich aus einer oder mehrerer Konfigurationen (configuration) zusammen, die miteinander kommunizieren können. Sie bestehen wiederum aus einer oder mehrerer Ressourcen und der Definition gemeinsamer Datenbereiche.

### Definition: Ressource

Eine Ressource (resource) besteht aus Programmen, denen wiederum Tasks zugeordnet sein können.

### Definition: Konfigurations-Organisations-Einheit - KOE

Die Konfiguration und die Ressourcen bilden zusammen eine Konfigurations-Organisations-Einheit (KOE).

### Sprachmittel zur Beschreibung einer Konfiguration

```

CONFIGURATION Automatisierungsaufgabe
  VAR_GLOBAL
    Name_1: Typ1;
    Name_2: Typ2;
    ...
  END_VAR
  RESOURCE SPS_1 ON PROC1
    TASK Schnell (interval := t#50ms, priority := 1);
    TASK Langsam (interval := t#500ms, priority := 2);
    ...
    PROGRAM A WITH Schnell : Programm-Organisationseinheit 1 (POE 1)
    (
      Absolute Adresszuweisungen an die Variablen der POE 1;
      z. B.:
      Eingangsvariable := %I 1.0;
      Ausgangsvariable => %Q2.0;
    )
    PROGRAM B WITH Langsam : Programm-Organisationseinheit 2 (POE 2)
    (
      Absolute Adresszuweisungen an die Variablen der POE 2;
    )
  END-RESOURCE
  ...
  VAR_ACCESS
    Freigabe lokaler Variablen aus Programm-Organisationseinheiten
  END_VAR
END_CONFIGURATION

```

### Definition: Programm-Organisationseinheit - POE

**Programm-Organisationseinheiten** (program organization unit POU) können in einer SPS-Ressource Programme, Funktionsbausteine und Funktionen sein.

### Definition: Programm

Die **Programme** (programs) stehen auf oberster Stufe der POE-Hierarchie. Sie können Funktionsbausteine und Funktionen aufrufen. Sie selbst können nur von Ressourcen aktiviert werden. Ein Programm besteht, wie jede andere Programm-Organisationseinheit aus drei Teilen: dem Kopf, dem Deklarationsteil und dem Anweisungsteil. Die POE-Köpfe werden von Schlüsselworten eingeleitet. Für ein Programm gilt:



```

PROGRAM Programmname
  Deklarationen;
  Anweisungen;
END_PROGRAM

```

### Definition: Funktionsbaustein

Die **Funktionsbausteine FBS** (function block FB) sind den Programmbausteinen (PB) der seitherigen Norm sehr ähnlich. Es sind Programm- und Datenstrukturen mit einem Gedächtnis.

```

FUNCTION_BLOCK FBS-Name
  Deklarationen;
  Anweisungen;
END_FUNCTION_BLOCK

```

### Definition: Funktion

Die **Funktionen** sind Unterprogramme, die beliebig viele Eingangsvariablen besitzen können, jedoch nur einen Ausgangsparameter zurückgeben dürfen. Sie können keine Daten speichern, besitzen deshalb auch kein Gedächtnis:

```

FUNCTION Funktionsname: Typ
  VAR_INPUT Namen: Typen; END_VAR      (Lokale Eingabevariablen)
  VAR Namen: Typen; END_VAR            (Interne Variablen)
  ... ;                                (Anweisungen)
  Funktionsname := ... ;                (Wertübergabe)
END_FUNCTION

```

Es stehen eine Fülle von Datentypen zur Definition von Variablen zur Verfügung. Sie werden prinzipiell durch folgende Anweisung definiert:

```

VAR Name-1, Name-2, ... : Datentyp;
END_VAR;

```

Entsprechende Modifizierer treffen zusätzliche Festlegungen bzgl. Speicherart und Adressierung.

### Neue SPS-Sprachen:

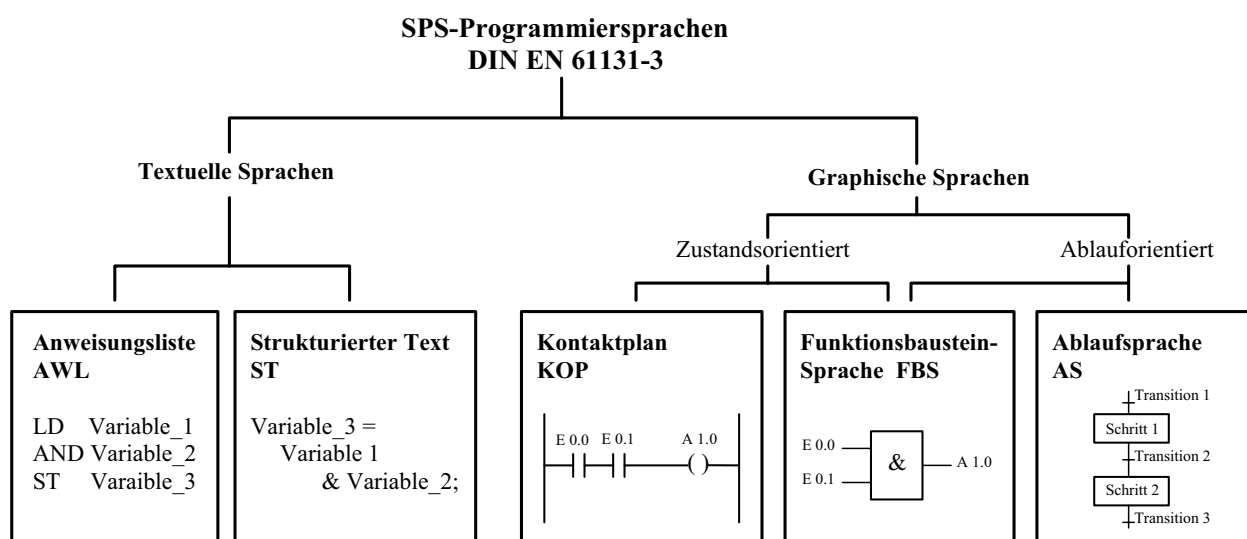

**SPS-Sprache: AWL**

Der Programmkörper der Textsprache **Anweisungsliste AWL** besteht aus einer Liste von Anweisungen. Jede Anweisung beginnt in einer neuen Zeile. Die Anweisung setzt sich aus Operator und Operand zusammen. In der AWL sind auch Sprünge erlaubt.

*Operatoren der Anweisungsliste*

| Art                 | Operator | Modifizierer | Operandtyp  |                                                     |
|---------------------|----------|--------------|-------------|-----------------------------------------------------|
| Bitbefehle          | LD       | N            | Alle        | Laden eines Operanden                               |
|                     | ST       | N            | Alle        | Speichern in einen Operanden                        |
|                     | S        |              | Alle        | Setzen einer logischen Variablen auf 1 (wahr)       |
|                     | R        |              | Alle        | Rücksetzen einer logischen Variablen auf 0 (falsch) |
|                     | AND, &   | N, (         | BOOLE       | Logisches UND                                       |
|                     | OR       | N, (         | BOOLE       | Logisches ODER                                      |
|                     | XOR      | N, (         | BOOLE       | Logisches Exklusiv-ODER                             |
| Arithmetikbefehle   | ADD      | (            | Alle        | Addition                                            |
|                     | SUB      | (            | Alle        | Subtraktion                                         |
|                     | MUL      | (            | Alle        | Multiplikation                                      |
|                     | DIV      | (            | Alle        | Division                                            |
| Relationale Befehle | GT       |              | Alle        | Vergleich >                                         |
|                     | GE       |              | Alle        | Vergleich $\geq$                                    |
|                     | EQ       |              | Alle        | Vergleich =                                         |
|                     | NE       |              | Alle        | Vergleich $\neq$                                    |
|                     | LT       |              | Alle        | Vergleich $\leq$                                    |
| Ablaufbefehle       | JMP      | C, N         | Sprungmarke | Sprung nach Sprungmarke                             |
|                     | CAL      | C, N         | FB-Name     | Aufruf eines FB                                     |
|                     | RET      | C, N         | -           | Rücksprung                                          |
|                     | )        |              | Alle        | Verknüpfung internes Ergebnis und Klammerinhalt     |

Die Modifizierer der Operatoren besitzen folgende Bedeutung:

| Modifizierer | Bedeutung                                                                              | Beispiel           |
|--------------|----------------------------------------------------------------------------------------|--------------------|
| N            | Negierung des Operanden                                                                | LDN Variable       |
| C            | Bedingte Ausführung eines Befehls (conditional) dann, wenn Bitergebnis WAHR ist.       | JMPC SR_FLIPFLOP   |
| CN           | Bedingte Ausführung eines Befehls (conditional not) dann, wenn Bitergebnis FALSCH ist. | CALLCN SR_FLIPFLOP |
| (            | Festlegung der Auswertungsfolge                                                        | AND( .... )        |

**SPS-Sprache: ST**

Der **Strukturierte Text ST** ist eine Pascal ähnliche Programmiersprache. Sie ist für Anwender mit Programmiererfahrung leicht zu erlernen.

*Operatoren des Strukturierten Textes*

| Operator                                     | Erklärung            | Priorität | Bemerkungen                                                  |
|----------------------------------------------|----------------------|-----------|--------------------------------------------------------------|
| ( <i>Ausdruck</i> )                          | Ausdruck-Klammer     | 1         | Notwendig für die Reihenfolge der Bearbeitung von Ausdrücken |
| <i>Funktionsname</i><br>( <i>Argumente</i> ) | Funktionsaufruf      | 2         | Beispiel: sin(x, y)                                          |
| **                                           | Potenzierung         | 3         |                                                              |
| -                                            | Negation             | 4         | Vorzeichen einer Variablen, Zahl: -x, -10                    |
| NOT                                          | Komplement           | 4         |                                                              |
| *                                            | Multiplikation       | 5         |                                                              |
| /                                            | Division             | 5         |                                                              |
| MOD                                          | Modulo Division      | 5         | Rest bei Integer-Division                                    |
| +                                            | Addition             | 6         |                                                              |
| -                                            | Subtraktion          | 6         | x - y, x - 10                                                |
| <, >, <=, >=                                 | Vergleiche           | 7         |                                                              |
| =, <>                                        | Gleich, Ungleich     | 8         |                                                              |
| &, AND                                       | Logische Konjunktion | 9         |                                                              |
| XOR                                          | Logische Antivalenz  | 10        |                                                              |
| OR                                           | Logische Disjunktion | 11        |                                                              |
| :=                                           | Zuweisung            |           | Wertübergabe an einen Links-Ausdruck                         |

*Sprachelemente für den Programmablauf*

| Steuerelement                                                                           | Verwendung (Beispiele ohne Bedeutung)                                                                                                                                  |
|-----------------------------------------------------------------------------------------|------------------------------------------------------------------------------------------------------------------------------------------------------------------------|
| IF <i>Bedingung</i> THEN ...<br>ELSEIF <i>Bedingung</i> THEN ...<br>ELSE ...<br>END_IF; | IF Schalter_1 <> 0 THEN      Licht_1 := 1;<br>ELSEIF Schalter_2 = 0 THEN    Licht_2 := 0;<br>ELSE                            Licht_1 := 0;<br>Licht_2 := 0;<br>END_IF; |
| CASE ... OF<br>K1: ...<br>K2: ...<br>ELSE<br>...<br>END_CASE;                           | CASE Zeichen OF<br>1: Licht_1 := 1;<br>2: Licht_2 := 1;<br>ELSE<br>Licht_1 := 0;<br>Licht_2 := 0;<br>END_CASE;                                                         |
| FOR ... TO ... BY ... DO<br>...<br>END_FOR;                                             | X := 0;<br>FOR i := 1 TO 100 BY 2 DO<br>X := X + i;<br>END_FOR;                                                                                                        |
| WHILE <i>Bedingung</i> DO<br>...<br>END_WHILE;                                          | X := 0;<br>I := 1;<br>WHILE i <= 100 DO<br>X := X + i;<br>i := i + 2;<br>END_WHILE;                                                                                    |
| REPEAT<br>...<br>UNTIL <i>Bedingung</i> ;<br>END_REPEAT;                                | X := 0;<br>I := 0;<br>REPEAT<br>X := X + i;<br>i := i + 2;<br>UNTIL i <= 100;<br>END_REPEAT;                                                                           |
| EXIT<br><br>RETURN                                                                      | Bei verschachtelter Bearbeitung von Ausdrücken wird die innerste Ebene verlassen.<br>Vorzeitiges Verlassen eines Funktionsbausteins oder einer Funktion.               |

### SPS-Sprache: KOP

Bei einem **Kontaktplan KOP** wird das SPS-Programm als Verkettung von Schalt- und Relaiskontakten repräsentiert. Er entspricht den Darstellungen der Beschreibungsform Kontaktplan für Steuerungen.

#### *Zusätzliche Symbole Kontaktplan nach IEC 1131*

 Marke Sprung zu der Marke

Marke:

 <RETURN> Sprung zurück

 Schalter erkennt eine positiven/negative Flanke

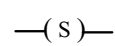 Setzen der Spule auf TRUE  
Wert bleibt gesetzt,  
bis Rücksetzspule aktiviert wird

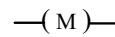 Speichern des Spulenwerts  
im nichtflüchtigen Speicherbereich

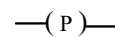 Spulenwert übernimmt den Wert  
bei positiver/negativer Flanke

(\* Kommentar \*)

### SPS-Sprache: FBS

Die **Funktionsbausteinsprache FBS** erstellt ein SPS-Programm durch das Verbinden von Funktionsblöcken und Funktionsbausteinen mit Wirkungslinien. Die Linien können untereinander ebenfalls verknüpft sein.

#### *Zusätzliche Symbole Funktionsplan FBS nach IEC 1131*

 >> Marke Bedingter Sprung

TRUE ———>> Marke Unbedingter Sprung

Marke:

 <RETURN> Bedingter Rücksprung

TRUE ———<RETURN> Unbedingter Rücksprung

(\* Kommentar \*)

**SPS-Sprache: AS**

Die **Ablaufsprache AS** ist nicht direkt mit den vier anderen SPS-Sprachen zu vergleichen. Sie ist eine Strukturierungssprache zur einfachen Beschreibung von Schrittketten für Ablaufsteuerungen. Mit AS können in die Programm-Organisationseinheiten (POE) die Schritte und Transitionen von Ablaufsteuerungen integriert werden.

*AS-Sprachelemente für die Schrittprogrammierung*

| Textuelle Darstellung                                                                                                                                                                                                                                                                                                                                                                                                                                                                                                                                                      | Graphische Darstellung                                                                                                                                                                                                                                                  |
|----------------------------------------------------------------------------------------------------------------------------------------------------------------------------------------------------------------------------------------------------------------------------------------------------------------------------------------------------------------------------------------------------------------------------------------------------------------------------------------------------------------------------------------------------------------------------|-------------------------------------------------------------------------------------------------------------------------------------------------------------------------------------------------------------------------------------------------------------------------|
| <pre> INITIAL_STEP Start:     Init_Aktion; END_STEP  TRANSITION FROM Start TO Schritt_1 :=TRUE; END_TRANSITION  STEP Schritt_1:     Aktion_1; END_STEP  TRANSITION FROM Schritt_1 TO Schritt_2 :=Bedingung_1; END_TRANSITION  STEP Schritt_2:     Aktion_2; END_STEP  TRANSITION FROM Schritt_2 TO Schritt_3 :=Bedingung_2; END_TRANSITION ...  TRANSITION FROM Schritt_n TO Schritt_1 :=Bedingung_n; END_TRANSITION  ACTION Init_Aktion:     AWL-, ST-, FBS- oder KOP-Programm; END_ACTION  ACTION Aktion_1:     AWL-, ST-, FBS- oder KOP-Programm; END_ACTION ... </pre> | <pre> graph TD     Start[Start] -.-&gt; TRUE  Schritt1[Schritt_1]     Schritt1 -.-&gt; Bedingung_1  Schritt2[Schritt_2]     Schritt2 -.-&gt; Bedingung_2  ...[...]     ... -.-&gt; Bedingung_n-1  Schrittn[Schritt_n]     Schrittn -.-&gt; Bedingung_n  Schritt1 </pre> |



## 5 Anhang

In diesem Anhang sind Eigenschaften und Gesetzmäßigkeiten zusammengestellt, die zur mathematischen Darstellung und Berechnung von Signalen und Systemen notwendig sind.

### 5.A Der Dirac-Impuls $\delta(t)$

Graphische Darstellung der verallgemeinerten Impulsfunktion (Distribution):

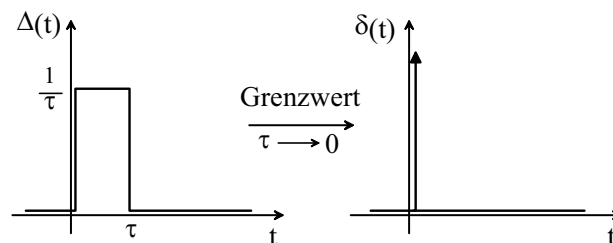

Eine Funktion mit solchen Eigenschaften kann im Rahmen der klassischen Analysis nicht behandelt werden. Sie wird deshalb durch das Integral

$$\lim_{\tau \rightarrow 0} \int_{-\infty}^{\infty} \Delta(t) dt = \int_{-\infty}^{\infty} \delta(t) dt = 1$$

definiert; man verwendet für das Rechnen jedoch den in dieser Gleichung zum Ausdruck kommenden Grenzübergang der Funktion  $\Delta(t)$ .

#### *Gesetzmäßigkeiten der "Dirac-Funktion"*

|                                                                                          |                           |
|------------------------------------------------------------------------------------------|---------------------------|
| $\delta(t) = \delta(-t)$                                                                 | Gerade Funktion           |
| $\delta(t - t_0)$                                                                        | Nadelimpuls bei $t = t_0$ |
| $f(t) \cdot \delta(t - t_0) = f(t_0) \cdot \delta(t - t_0)$                              | Vertauschung              |
| $\int_{-\infty}^{\infty} \delta(t) dt = 1$                                               | Normierung                |
| $\int_{-\infty}^{\infty} f(t) \cdot \delta(t - t_0) dt = f(t_0)$                         | Ausblendung               |
| $\delta(t) = \frac{1}{2\pi} \int_{-\infty}^{\infty} 1 \cdot e^{j\omega \cdot t} d\omega$ | Fourier-Darstellung       |

## 5.B Fourier- und Laplace-Transformation

### Definition: Fourier-Transformierte

Die **Fourier-Transformierte** eines Signals  $x(t)$  wird durch

$$\text{FT}\{x(t)\} = X(j\omega) = \int_{-\infty}^{\infty} x(t) \cdot e^{-j\omega \cdot t} dt$$

gegeben.

### Definition: Inverse Fourier-Transformation

Die **Fourier-Rücktransformation**

$$x(t) = \frac{1}{2\pi} \int_{-\infty}^{\infty} X(j\omega) \cdot e^{j\omega \cdot t} d\omega$$

stellt die umkehrbar eindeutige Beziehung zum Zeitbereich eines Signals her.

### Definition: Komplexe Frequenz

**Komplexe Frequenzen** werden durch die Variable

$$s \equiv \sigma + j \cdot \omega$$

definiert.

### Definition: Bildbereich

Die Ebene der komplexen Frequenzen  $s$  spannt den **Bildbereich** auf.

### Definition: Laplace-Transformation

Ist  $x(t)$  ein Signal mit der Eigenschaft  $x(t) = 0$  für  $t < 0$ , so lautet die einseitige **Laplace-Transformierte**:

$$X(s) = \text{LT}\{x(t)\} = \int_{0-}^{\infty} x(t) \cdot e^{-s \cdot t} dt$$

### Definition: Konvergenzbereich

Den Wertebereich von  $s$ , für den die Laplace-Transformierte ausgewertet werden kann, bezeichnet man als den **Konvergenzbereich** der Laplace-Transformation.

### Definition: Inverse Laplace-Transformation

Die **inverse Laplace-Transformation** wird durch das komplexe Integral

$$x(t) = \text{FT}^{-1}\{X(s)\} = \frac{1}{2\pi \cdot j} \int_{c-j\cdot\infty}^{c+j\cdot\infty} X(s) \cdot e^{+s \cdot t} ds$$

gegeben. Bei der Integration ist darauf zu achten, dass der Integrationsweg im Konvergenzbereich liegt. Man erreicht dies dadurch, dass alle singulären Punkte (Unendlichkeitsstellen) von  $X(s)$  im linken Halbraum bzgl. der Konstanten  $c$  zu liegen kommen.



**Gesetzmäßigkeiten der Frequenztransformationen**

|                           | <b>Fourier-Transformation</b>                                                                                                                                                                       | <b>Laplace-Transformation<br/>(gültig für <math>t &gt; 0</math>)</b>                                                                                                                                                                                  |
|---------------------------|-----------------------------------------------------------------------------------------------------------------------------------------------------------------------------------------------------|-------------------------------------------------------------------------------------------------------------------------------------------------------------------------------------------------------------------------------------------------------|
| Linearität                | $FT \{k_1 \cdot u(t) + k_2 \cdot v(t)\} =$<br>$= k_1 \cdot U(j\omega) + k_2 \cdot V(j\omega)$                                                                                                       | $LT \{k_1 \cdot u(t) + k_2 \cdot v(t)\} =$<br>$= k_1 \cdot U(s) + k_2 \cdot V(s)$                                                                                                                                                                     |
| Zeit-<br>verschiebung     | $FT \{u(t - t_0)\} = e^{-j\omega \cdot t_0} \cdot U(j\omega)$                                                                                                                                       | $LT \{u(t - t_0)\} = e^{-s \cdot t_0} \cdot U(s)$                                                                                                                                                                                                     |
| Frequenz-<br>verschiebung | $FT \{e^{-j\omega_0 \cdot t} \cdot u(t)\} = U(j(\omega + \omega_0))$                                                                                                                                | $LT \{e^{-s_0 \cdot t} \cdot u(t)\} = U(s + s_0)$                                                                                                                                                                                                     |
| Ähnlichkeit               | $FT \{u(a \cdot t)\} = \frac{1}{ a } \cdot U\left(\frac{j\omega}{a}\right)$                                                                                                                         | $LT \{u(a \cdot t)\} = \frac{1}{a} \cdot U\left(\frac{s}{a}\right)$                                                                                                                                                                                   |
| Differentiation           | $FT \left\{ \frac{d^n}{dt^n} u(t) \right\} = (j\omega)^n \cdot U(j\omega)$<br>für $n = 1, 2, 3, \dots$<br><br>Für 1. Zeitableitung gilt:<br>$FT \{\dot{u}(t)\} = j\omega \cdot U(j\omega) - u(t=0)$ | $LT \left\{ \frac{d^n}{dt^n} u(t) \right\} =$<br>$= s^n \cdot U(s) - \sum_{k=0}^{n-1} s^{n-k-1} \cdot \frac{d^k}{dt^k} u(t) \Big _{t=0}$<br>für $n = 1, 2, 3, \dots$<br><br>Für 1. Zeitableitung gilt:<br>$LT \{\dot{u}(t)\} = s \cdot U(s) - u(t=0)$ |
| Integration               | $FT \left\{ \int_{-\infty}^t f(\tau) d\tau \right\} = \frac{1}{j\omega} \cdot U(j\omega) +$<br>$+ \pi \cdot U(0) \cdot \delta(\omega)$                                                              | $LT \left\{ \int_0^t u(\tau) d\tau \right\} = \frac{1}{s} \cdot U(s)$<br>gültig für $u(t \leq 0) = 0$                                                                                                                                                 |
| Faltung                   | $FT \{u(t) * v(t)\} = U(j\omega) \cdot V(j\omega)$                                                                                                                                                  | $LT \{u(t) * v(t)\} = U(s) \cdot V(s)$                                                                                                                                                                                                                |
| Grenzwerte                |                                                                                                                                                                                                     | $\lim_{t \rightarrow +0} u(t) = \lim_{s \rightarrow \infty} \{s \cdot U(s)\}$<br><br>$\lim_{t \rightarrow \infty} u(t) = \lim_{s \rightarrow 0} \{s \cdot U(s)\}$                                                                                     |

## 5.C Korrespondenztabelle von Laplace-Transformationen<sup>1</sup>

| Nr. | Zeitfunktion $x(t)$<br>(Originalfunktion)                                                                                          | Laplace-Transformierte $X(s)$<br>(Bildfunktion)       |
|-----|------------------------------------------------------------------------------------------------------------------------------------|-------------------------------------------------------|
| 1   | Nadel-Impuls: $\delta(t)$                                                                                                          | 1                                                     |
| 2   | Verschobener Nadelimpuls: $\delta(t - T)$                                                                                          | $e^{-T \cdot s}$                                      |
| 3   | Sprungsignal: $\varepsilon(t)$                                                                                                     | $\frac{1}{s}$                                         |
| 4   | Rampensignal: $\rho(t) = \varepsilon(t) \cdot t$                                                                                   | $\frac{1}{s^2}$                                       |
| 5   | $\varepsilon(t) \cdot \frac{t^n}{n!} \quad n = 0, 1, 2, \dots$                                                                     | $\frac{1}{s^{n+1}}$                                   |
| 6   | Rechteckimpuls: $\varepsilon(t) - \varepsilon(t - T)$                                                                              | $\frac{1 - e^{-T \cdot s}}{s}$                        |
| 7   | $\varepsilon(t) \cdot e^{-\alpha \cdot t}$                                                                                         | $\frac{1}{s + \alpha}$                                |
| 8   | $\varepsilon(t) \cdot \frac{t^n}{n!} \cdot e^{-\alpha \cdot t} \quad n = 0, 1, 2, \dots$                                           | $\frac{1}{(s + \alpha)^{n+1}}$                        |
| 9   | $\varepsilon(t) \cdot (1 - e^{-\alpha \cdot t})$                                                                                   | $\frac{\alpha}{s(s + \alpha)}$                        |
| 10  | $\varepsilon(t) \cdot \sin(\omega_0 t)$                                                                                            | $\frac{\omega_0}{s^2 + \omega_0^2}$                   |
| 11  | $\varepsilon(t) \cdot \cos(\omega_0 t)$                                                                                            | $\frac{s}{s^2 + \omega_0^2}$                          |
| 12  | $\varepsilon(t) \cdot (1 - (1 + \alpha \cdot t)e^{-\alpha \cdot t})$                                                               | $\frac{\alpha^2}{s(s + \alpha)^2}$                    |
| 13  | $\varepsilon(t) \cdot \left( 1 + \frac{\beta \cdot e^{-\alpha \cdot t} - \alpha \cdot e^{-\beta \cdot t}}{\alpha - \beta} \right)$ | $\frac{\alpha \cdot \beta}{s(s + \alpha)(s + \beta)}$ |
| 14  | $\varepsilon(t) \cdot (e^{-\alpha \cdot t} \sin(\omega_0 t))$                                                                      | $\frac{\omega_0}{(s + \alpha)^2 + \omega_0^2}$        |
| 15  | $\varepsilon(t) \cdot (e^{-\alpha \cdot t} \cos(\omega_0 t))$                                                                      | $\frac{s + \alpha}{(s + \alpha)^2 + \omega_0^2}$      |
| 16  | $\varepsilon(t) \cdot t \cdot \sin(\omega_0 t)$                                                                                    | $\frac{2s \cdot \omega_0}{(s^2 + \omega_0^2)^2}$      |
| 17  | $\varepsilon(t) \cdot t \cdot \cos(\omega_0 t)$                                                                                    | $\frac{s^2 - \omega_0^2}{(s^2 + \omega_0^2)^2}$       |

<sup>1</sup> Weitere Korrespondenzen befinden sich in allen mathematischen Nachschlagwerken. Speziell wird auf das *Taschenbuch der Regelungstechnik*, L. Wendt, Verlag Harri Deutsch verwiesen.

## 5.D Partialbruchzerlegung

Bei der Berechnung von Zeitsignalen aus Bildfunktionen treten jedoch immer wieder gebrochen rationale Funktionen höheren Grades auf. Diese sind in Korrespondenztabelle i. a. nicht aufgelistet. Sie können aber mit Hilfe der Partialbruchzerlegung auf Grundfunktionen zurückgeführt werden, so dass einer Rücktransformation in den Zeitbereich mit Hilfe der Tabelle Anhang 5.C nichts im Wege steht.

Geht man von der gebrochen rationalen Funktion

$$U(s) = \frac{b_0 + b_1 \cdot s + \dots + b_m \cdot s^m}{a_0 + a_1 \cdot s + \dots + a_n \cdot s^n} \quad \text{mit: } m \leq n$$

im Bildbereich aus, sind für die Anwendung der Partialbruchzerlegung zuerst ihre Polstellen zu berechnen. Die Bildfunktion lässt sich mit diesen auf folgende Art darstellen:

$$U(s) = \frac{1}{a_n} \cdot \frac{b_0 + b_1 \cdot s + \dots + b_m \cdot s^m}{(s - s_{p1}) \cdot \dots \cdot (s - s_{pn})}.$$

Der Lösungsweg der Partialbruchzerlegung hängt von der Art der Polstellen ab. Man muss zwischen zwei Fällen unterscheiden:

- Die Polstellen sind nur einfach vorhanden.
- Es treten mehrfache Polstellen auf.

### Fall A: Die Polstellen sind nur einfach vorhanden

Die Bildfunktion lässt sich durch eine Summe von Partialbrüchen der Form

$$U(s) = \frac{b_m}{a_n} + \frac{C_1}{(s - s_{p1})} + \dots + \frac{C_n}{(s - s_{pn})}$$

mit den Koeffizienten  $C_i$  ( $1 \leq i \leq n$ )

$$C_i = \left\{ (s - s_{pi}) \cdot U(s) \right\} \Big|_{s=s_{pi}}$$

schreiben.

**Zeitfunktion:**

$$U(s) \rightarrow u(t) = \frac{b_m}{a_n} \delta(t) + C_1 \cdot e^{s_{p1} \cdot t} + \dots + C_n \cdot e^{s_{pn} \cdot t}.$$

### Fall B: Es treten mehrfache Polstellen auf

Existieren für die Bildfunktion  $U(s)$  insgesamt  $n'$  ( $n' < n$ ) verschiedene Polstellen  $s_{pi}$ , die jeweils  $k_i$ -fach vorhanden sind, schreibt sich ihre Partialbruchform auf folgende Art:

$$U(s) = \frac{b_m}{a_n} + \sum_{i=1}^{n'} \left\{ \sum_{k=1}^{k_i} \frac{C_{i,k}}{s - s_{pi}} \right\}$$

mit den Koeffizienten  $C_{i,k}$  ( $1 \leq i \leq n'$  und  $1 \leq k \leq k_i$ ):

$$C_{i,k} = \frac{1}{(k_i - k)!} \cdot \frac{d^{k_i - k}}{ds^{k_i - k}} \left\{ (s - s_{pi})^{k_i} \cdot U(s) \right\} \Big|_{s=s_{pi}}.$$

**Zeitfunktion:**

$$U(s) \rightarrow u(t) = \frac{b_m}{a_n} \delta(t) + \sum_{i=1}^{n'} \left\{ \sum_{k=1}^{k_i} C_{i,k} \frac{t^{k-1}}{(k-1)!} \cdot e^{s_{pi} \cdot t} \right\}.$$
